# Supplementary material
Source: publisher figshare collection journal article supplement (https://acs.figshare.com/ndownloader/files/10881704)
Supplement: Supplementary file 1 [file 10881704]

## **Supporting Information**

### **Pure water induced dehalogenation of 2,4-di-*tert*-amino-6-substituted-5-halogenopyrimidines**

Mahsa Mousavi, Mehdi Bakavoli,\* Ali Shiri, Hossein Eshghi

*Department of Chemistry, Faculty of Science, Ferdowsi University of Mashhad, 91775-1436,  
Vakilabad Blvd., Mashhad, Iran.*

*\*Corresponding author e-mail: mbakavoli@um.ac.ir; mbakavoli@yahoo.com*

#### **Contains:**

Copies of  $^1\text{H}$  NMR,  $^{13}\text{C}$  NMR, FTIR and Mass spectra as figures

- Total number of pages: 42 (S1 - S42)
- Total number of figures: 74 (Figure S1 – Figure S74)

Figure S1.  $^1\text{H}$  NMR spectrum for compound 2a.

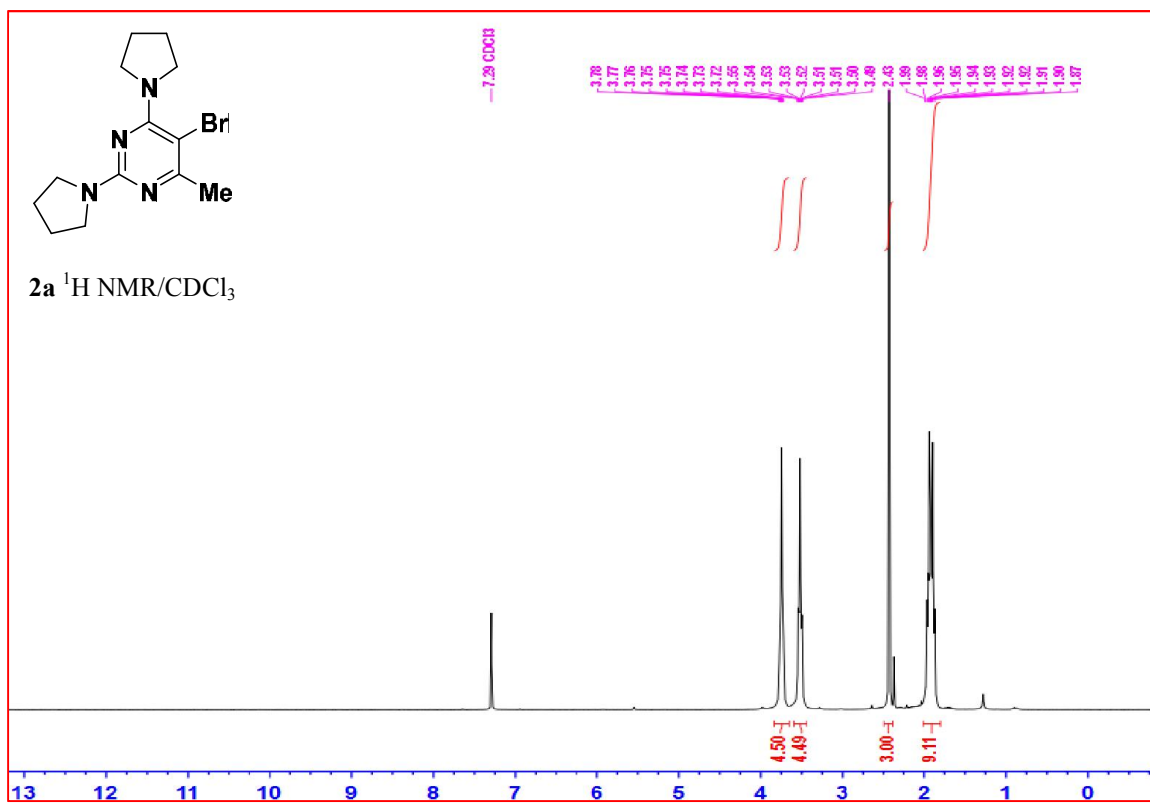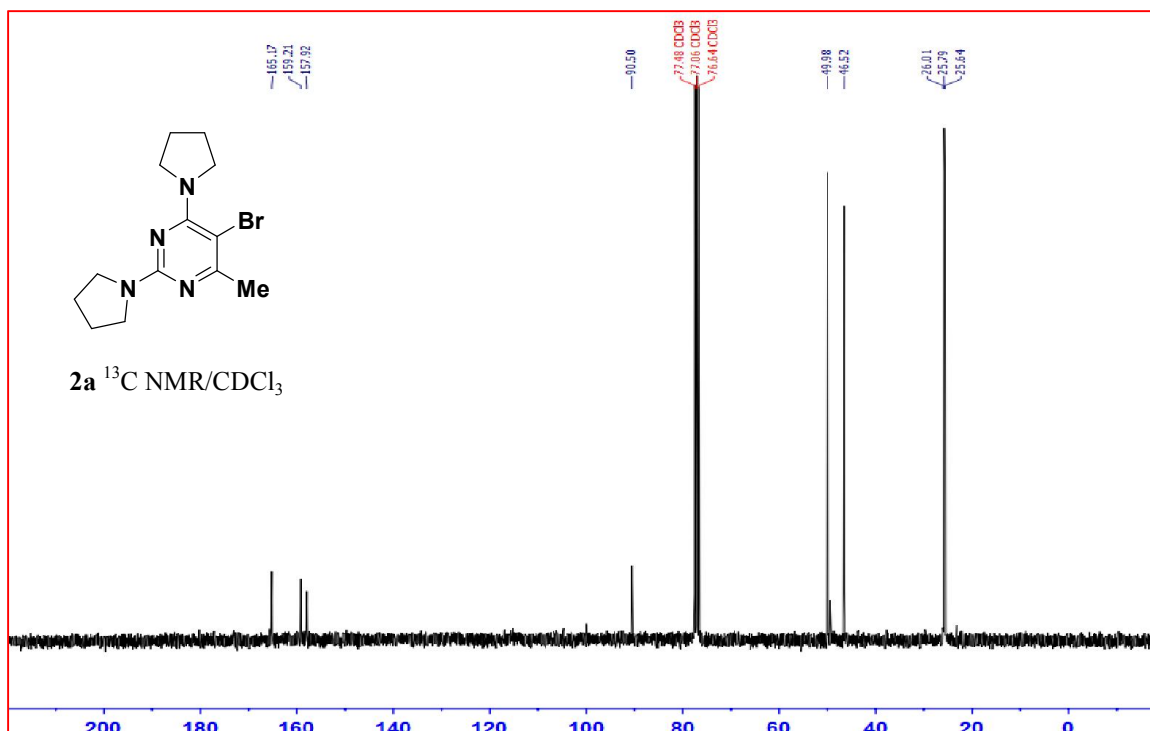

Figure S2.  $^{13}\text{C}$  NMR spectrum for compound 2a.

**Figure S3.** Mass spectrum for compound 2a.

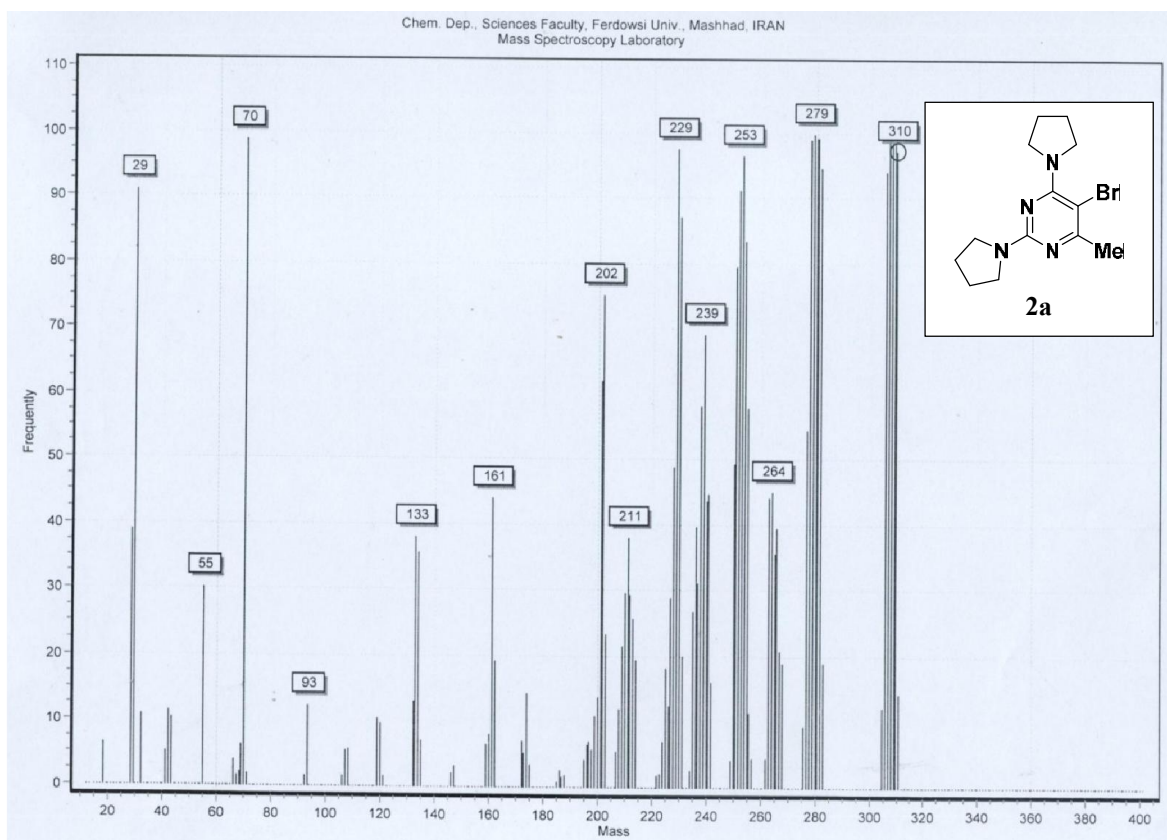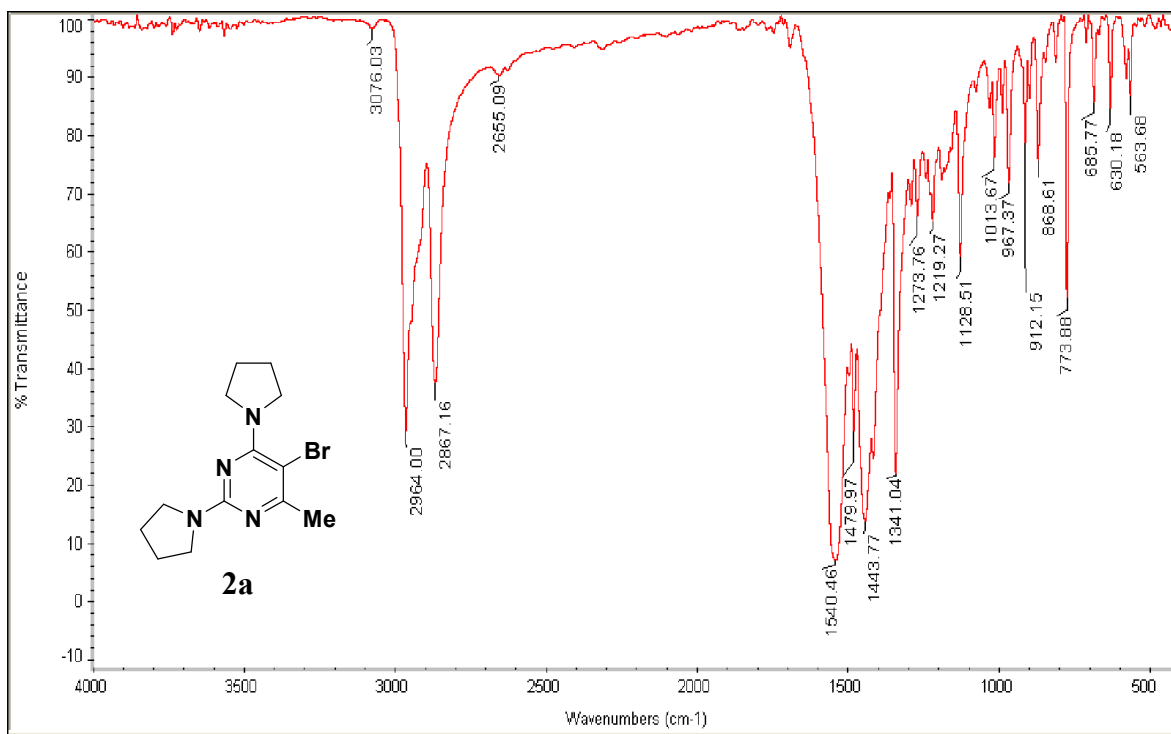

**Figure S4.** FTIR spectrum for compound 2a.

Figure S5.  $^1\text{H}$  NMR spectrum for compound 2b.

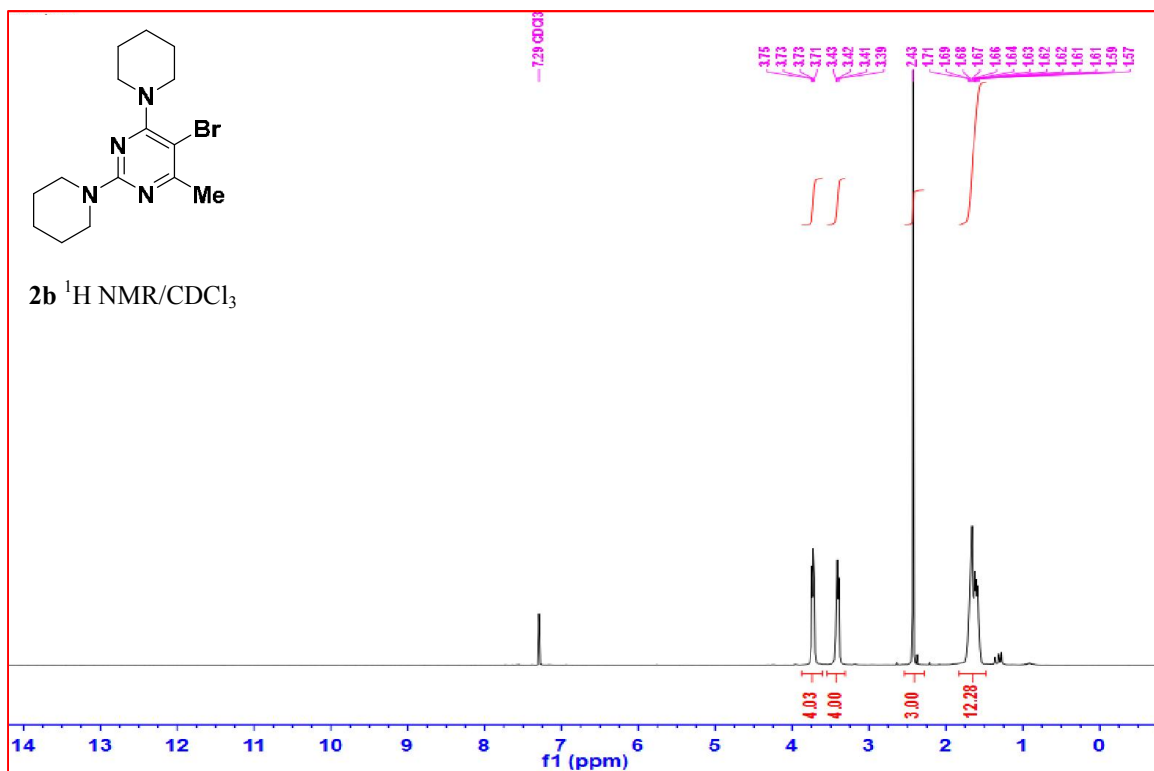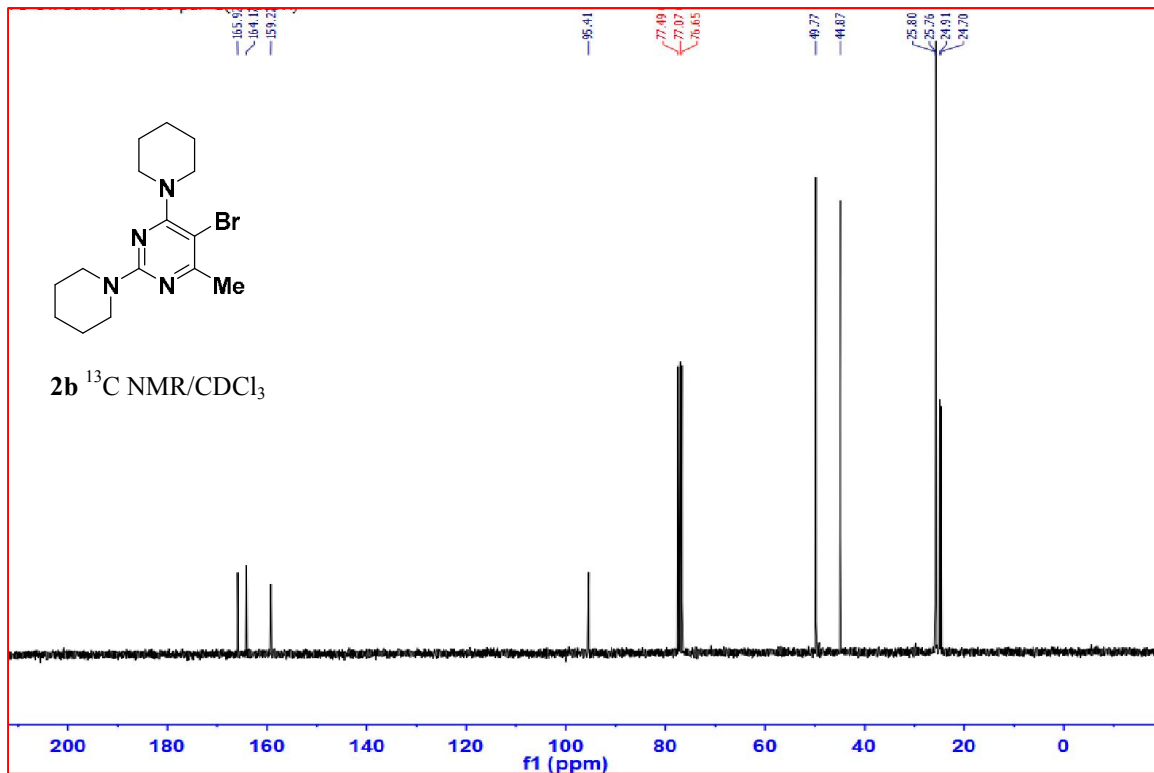

Figure S6.  $^{13}\text{C}$  NMR spectrum for compound 2b.

**Figure S7.** Mass spectrum for compound 2b.

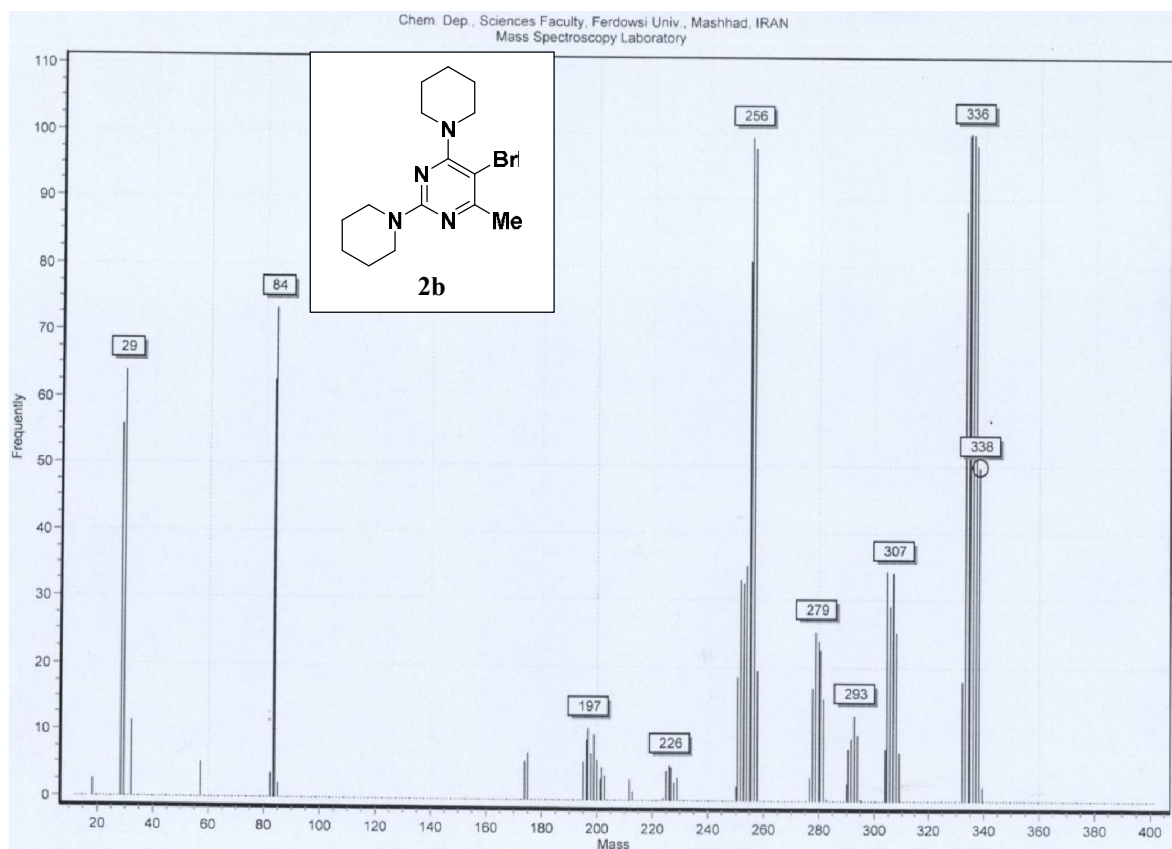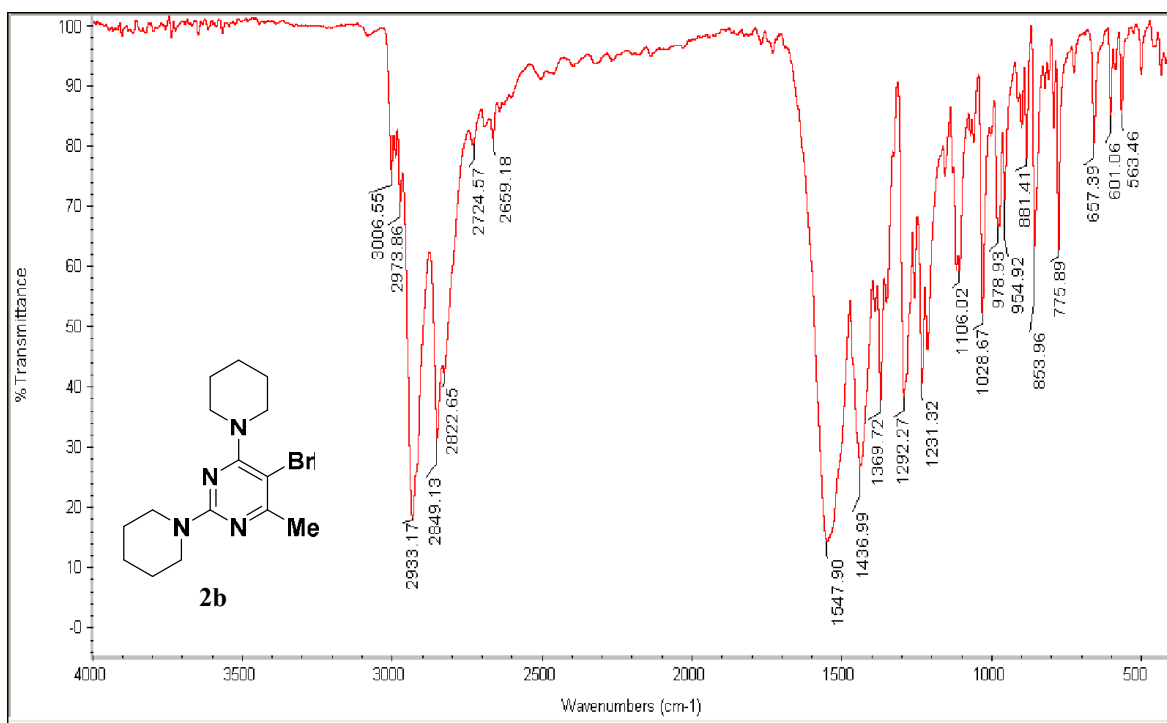

**Figure S8.** FTIR spectrum for compound 2b.

Figure S9.  $^1\text{H}$  NMR spectrum for compound 2c

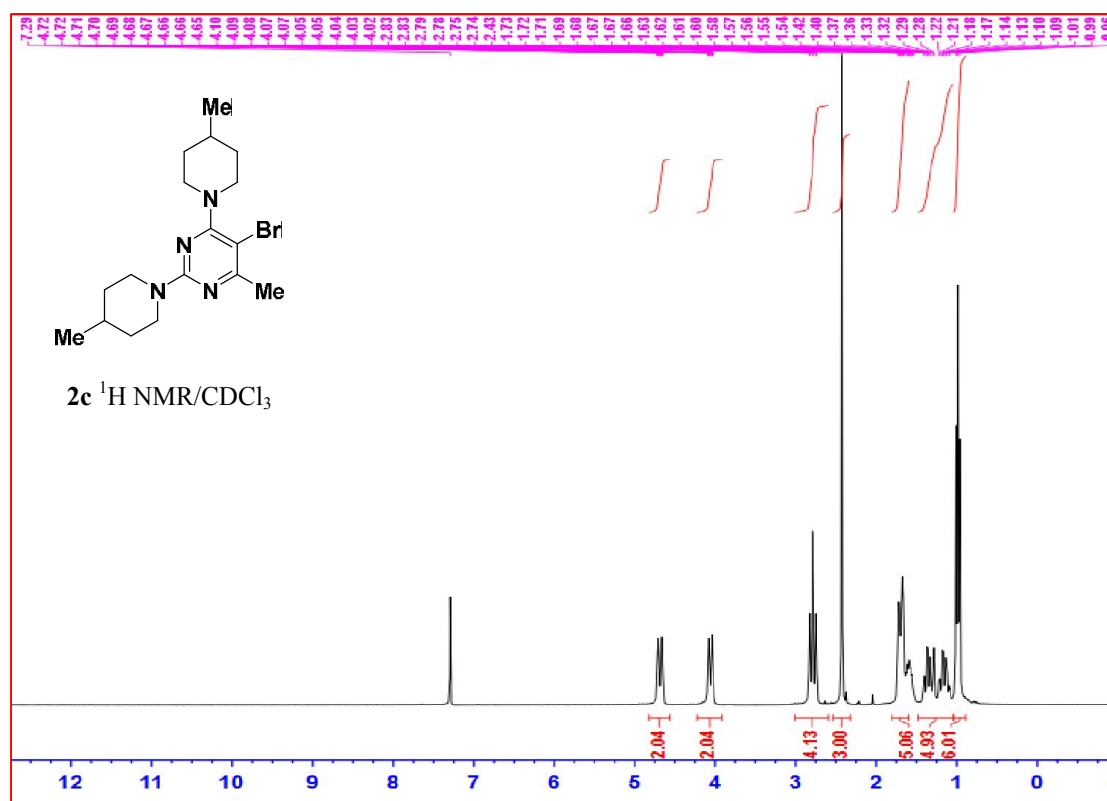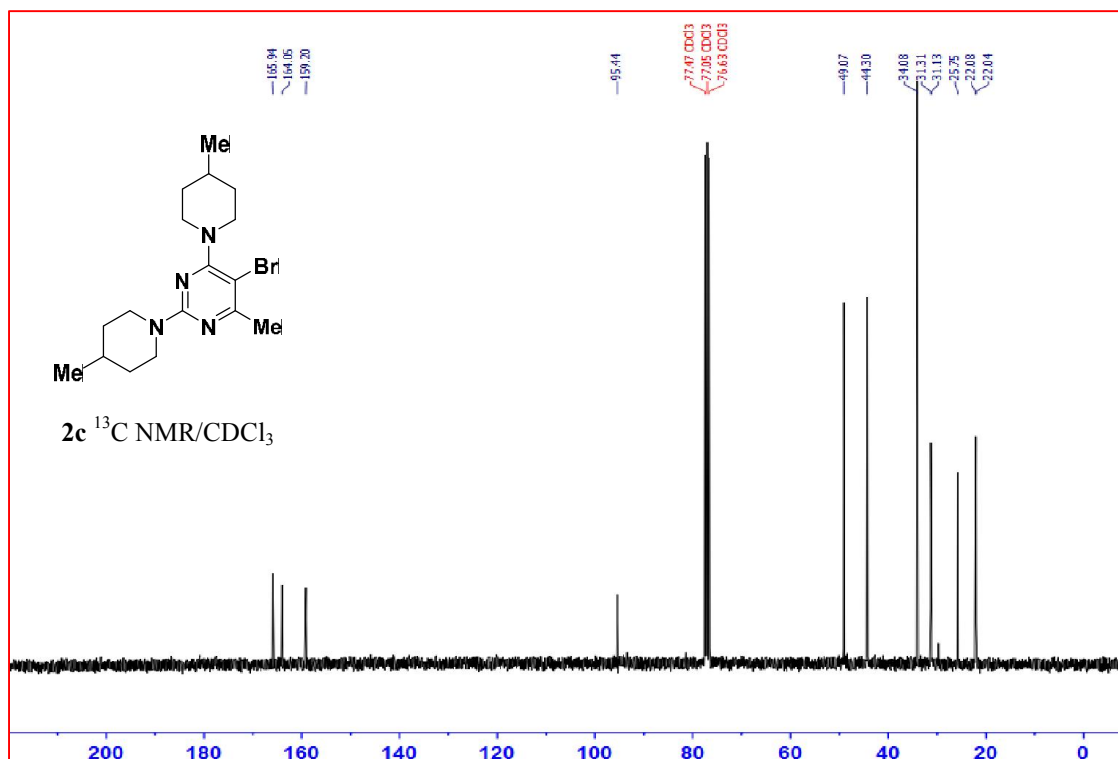

Figure S10.  $^{13}\text{C}$  NMR spectrum for compound 2c

**Figure S11.** Mass spectrum for compound **2c**.

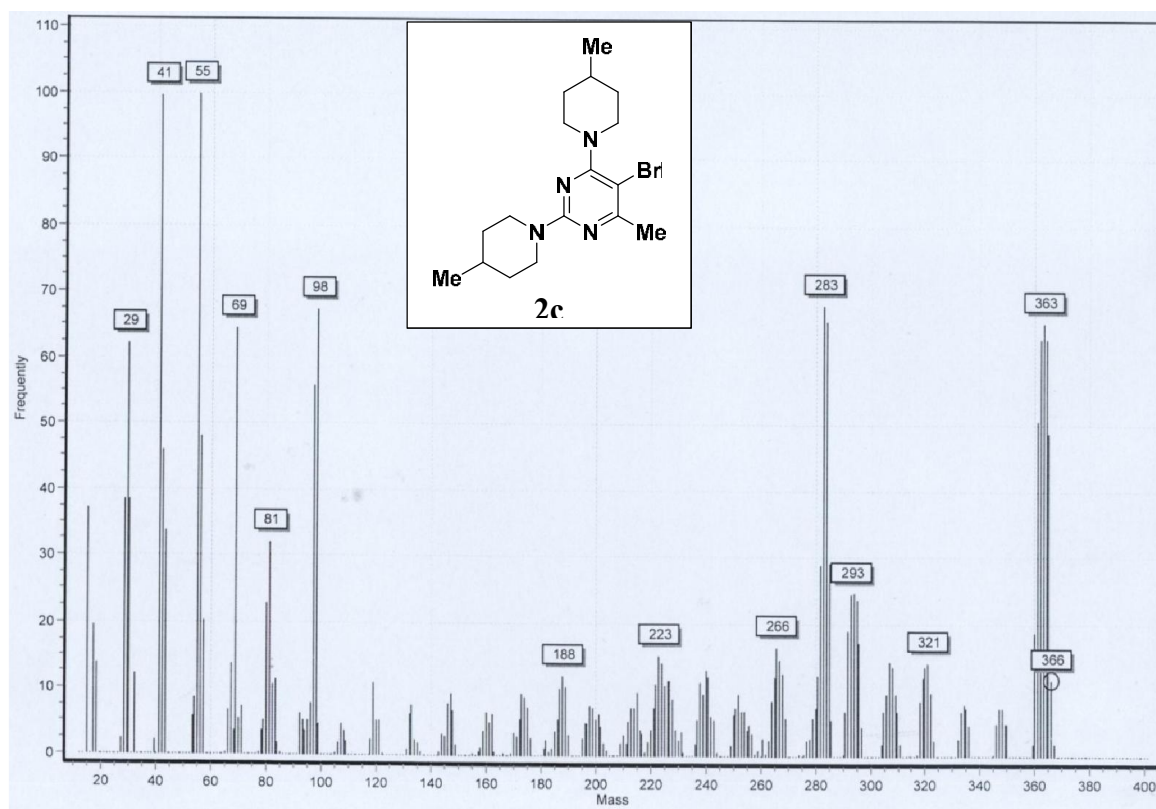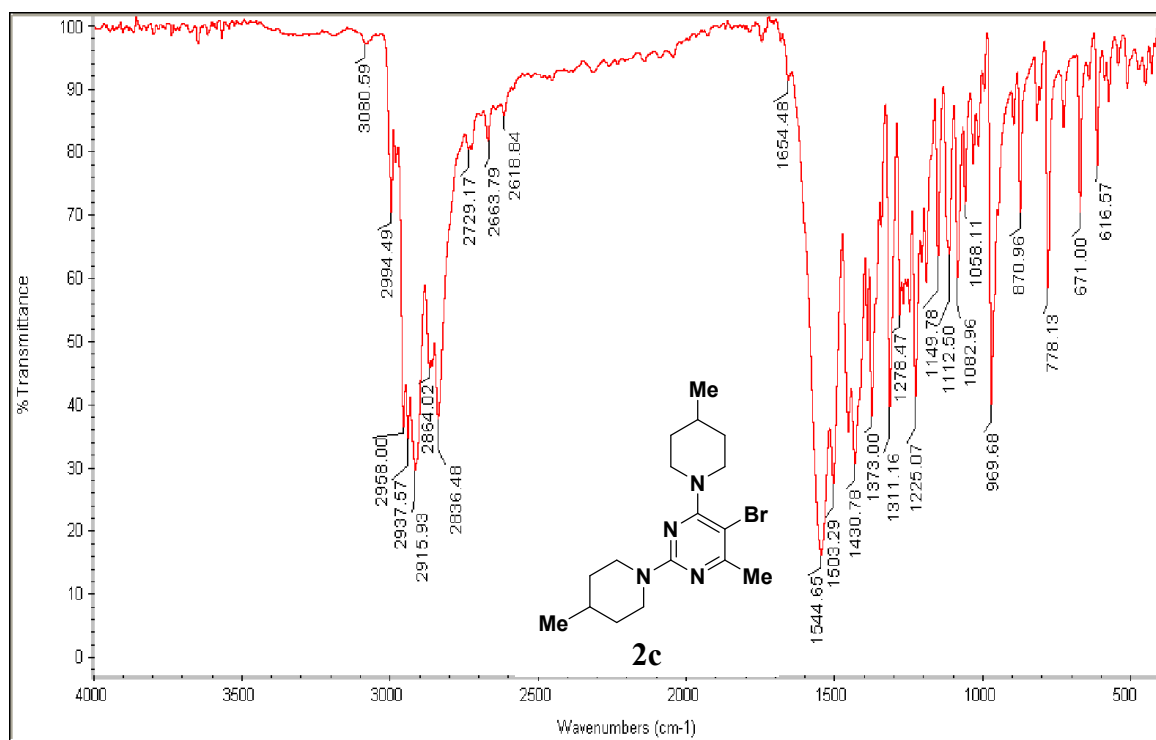

**Figure S12.** FTIR spectrum for compound **2c**

**Figure S13.**  $^1\text{H}$  NMR spectrum for compound 2d

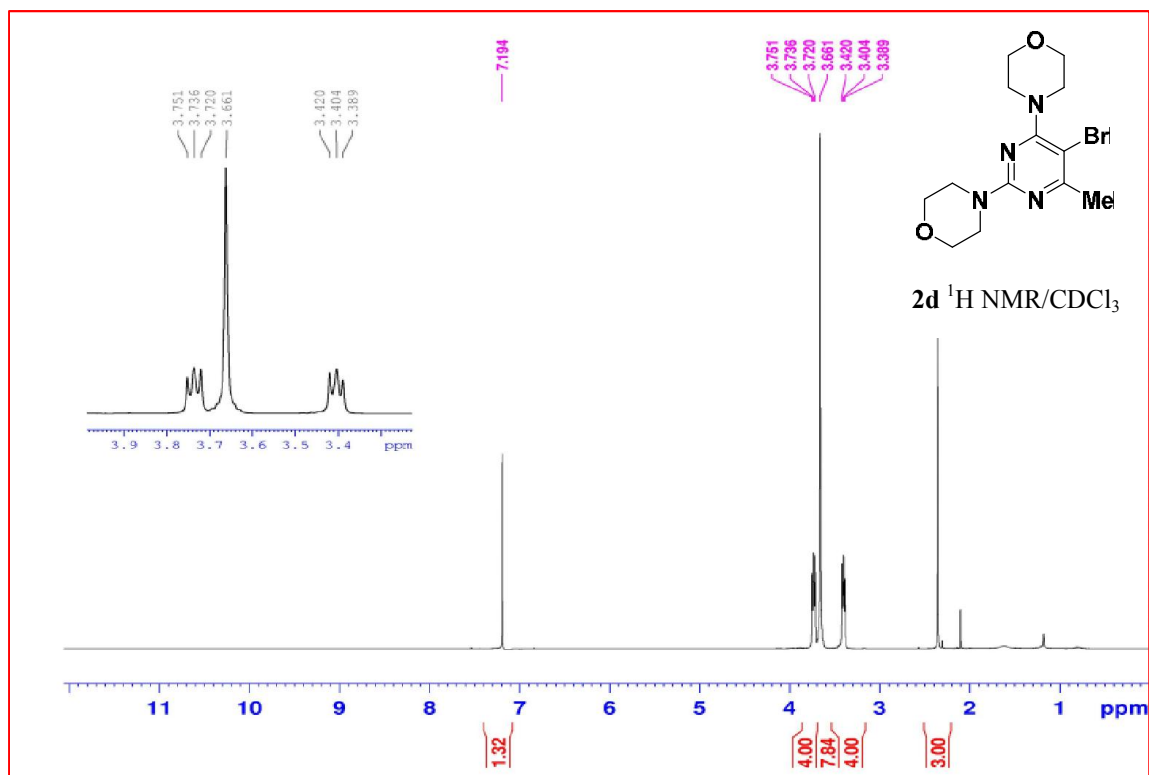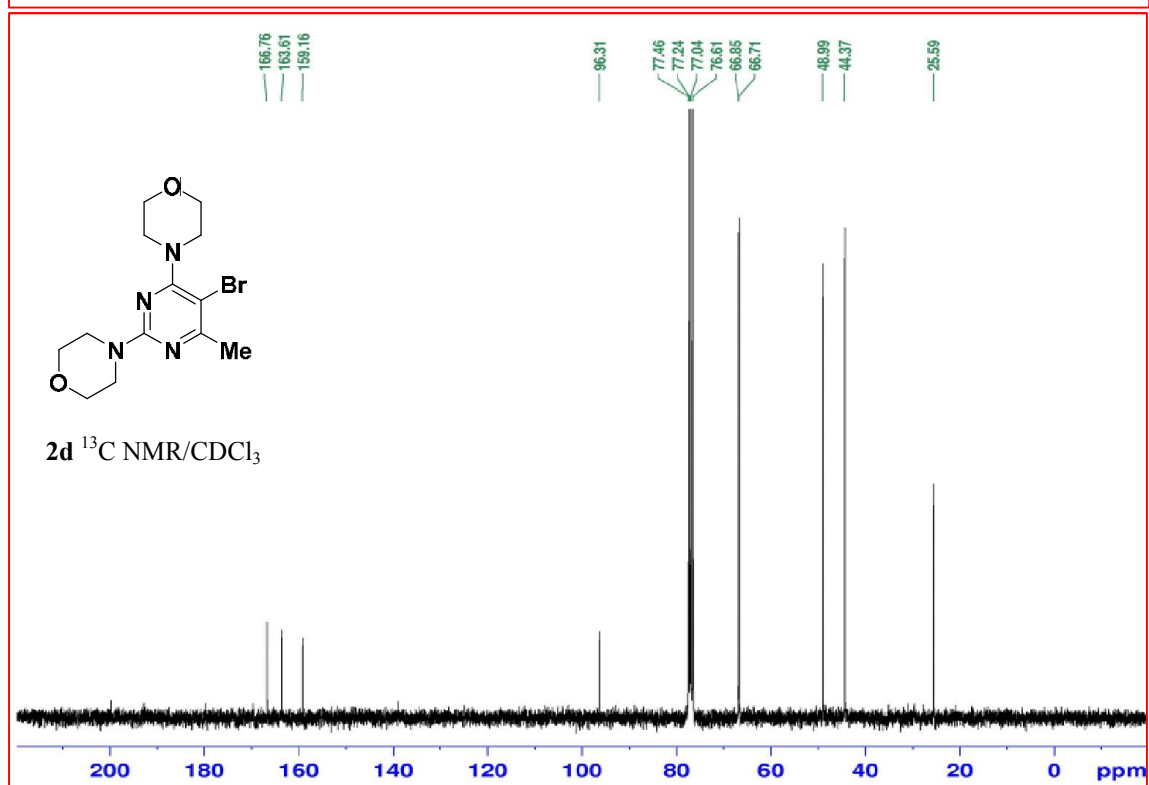

**Figure S14.**  $^{13}\text{C}$  NMR spectrum for compound 2d



**Figure S15.** Mass spectrum for compound 2d

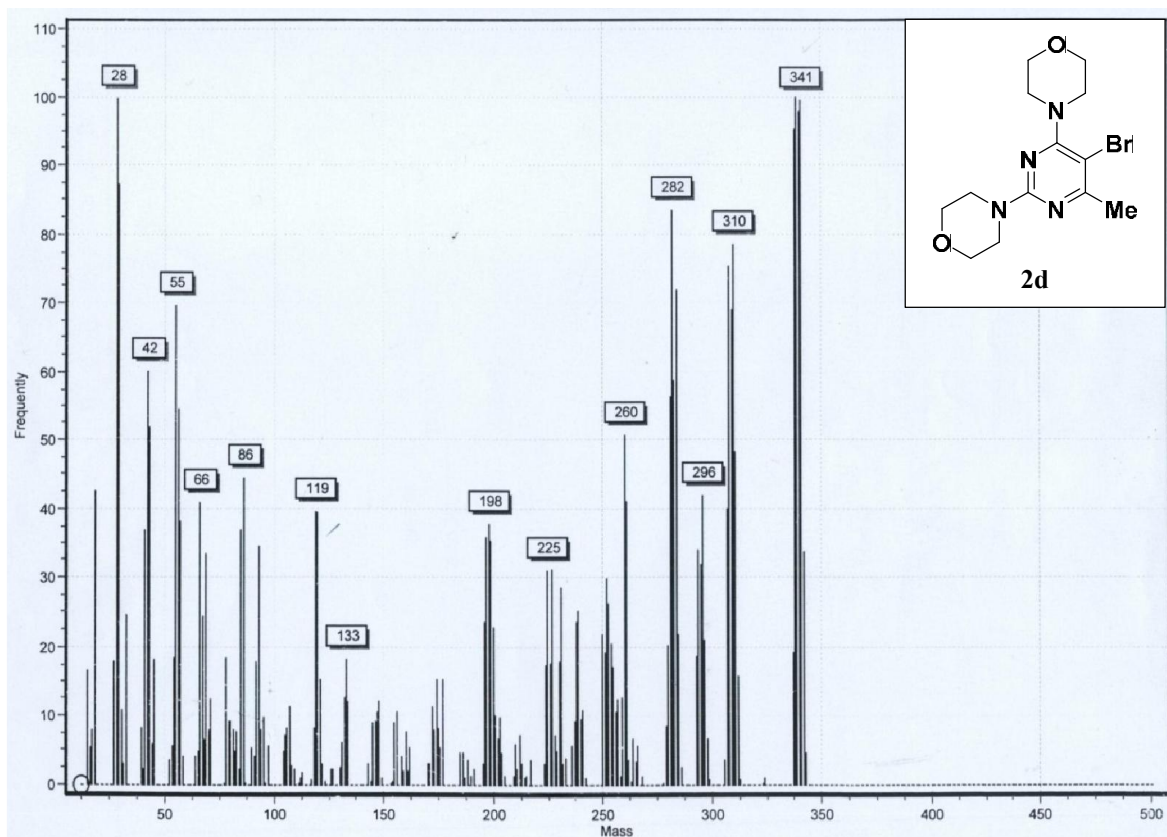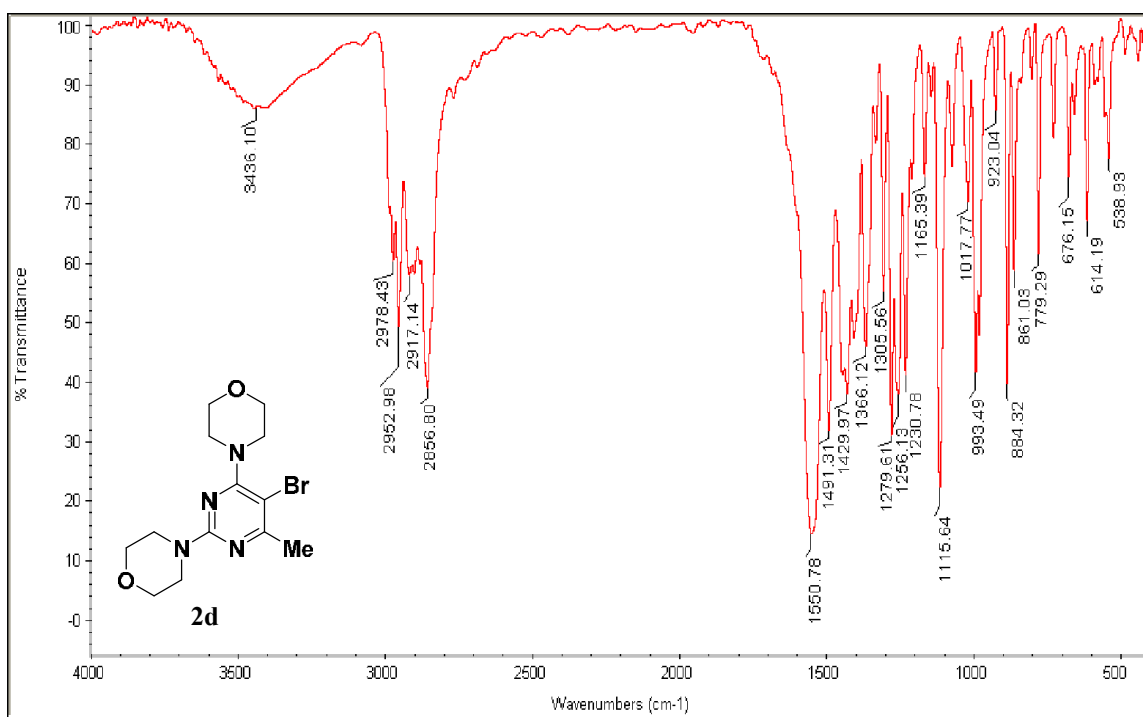

**Figure S16.** FTIR spectrum for compound 2d

**Figure S17.**  $^1\text{H}$  NMR spectrum for compound 3a

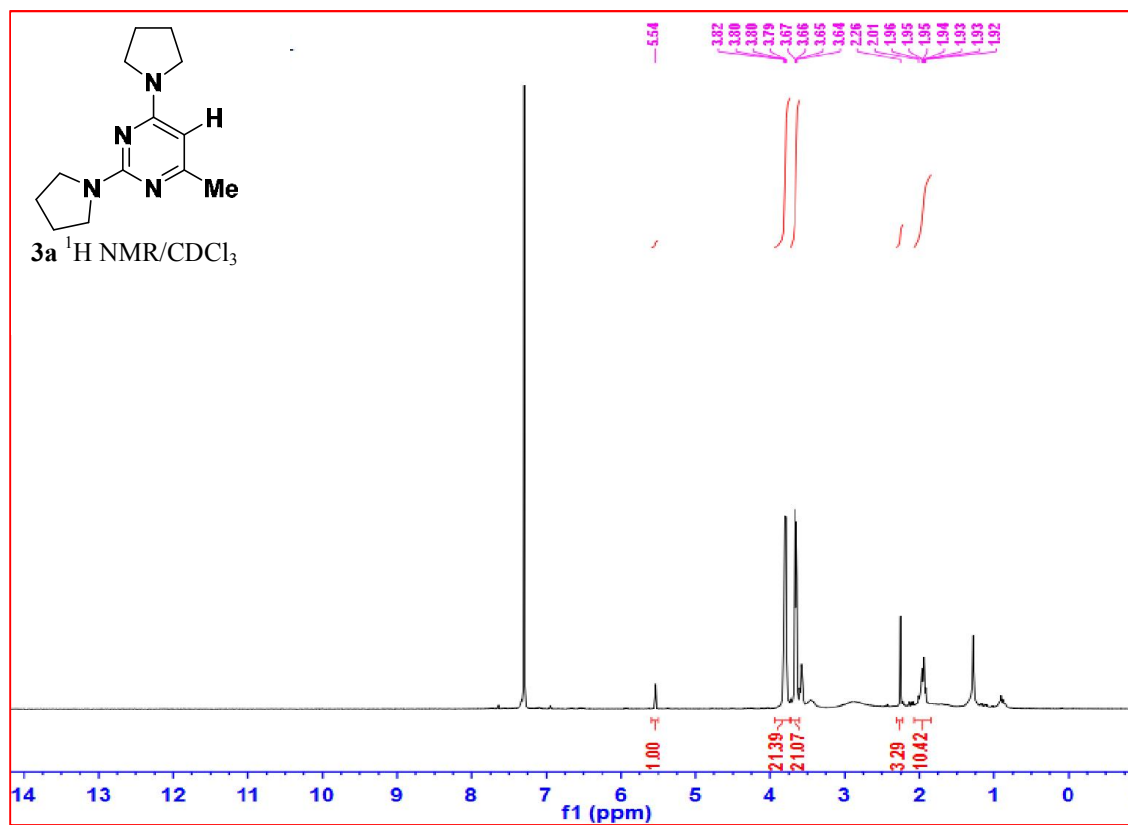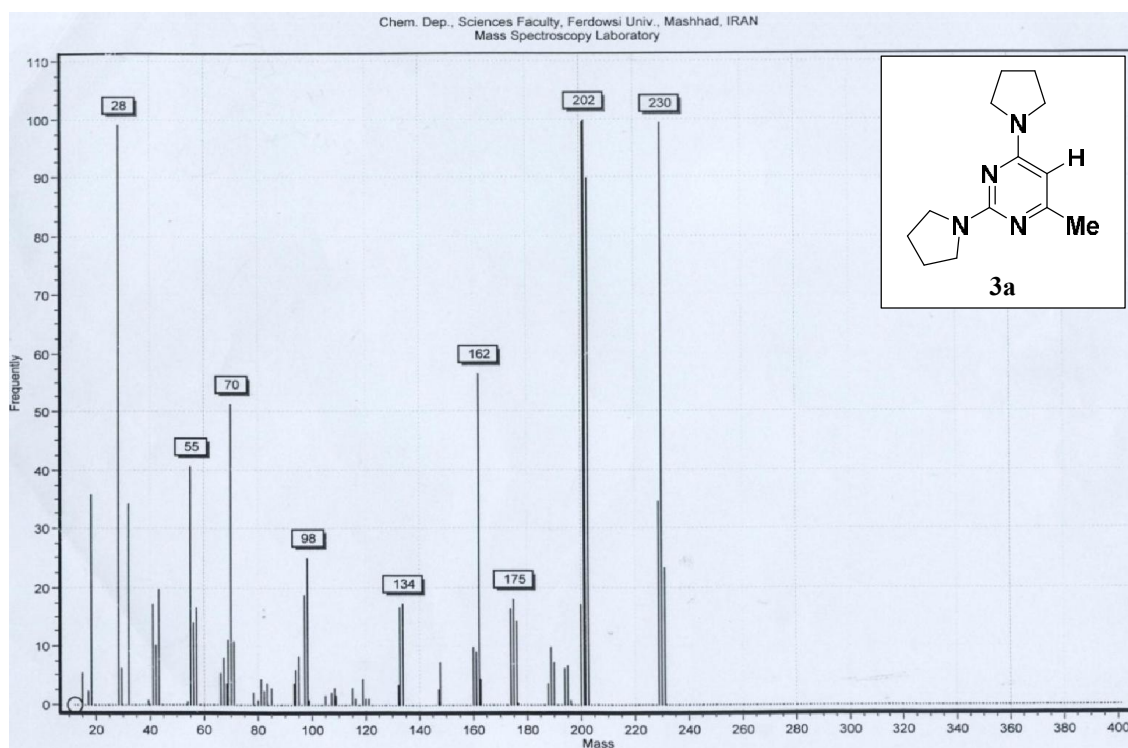

**Figure S18.** Mass spectrum for compound 3a

Figure S19.  $^1\text{H}$  NMR spectrum for compound 3b

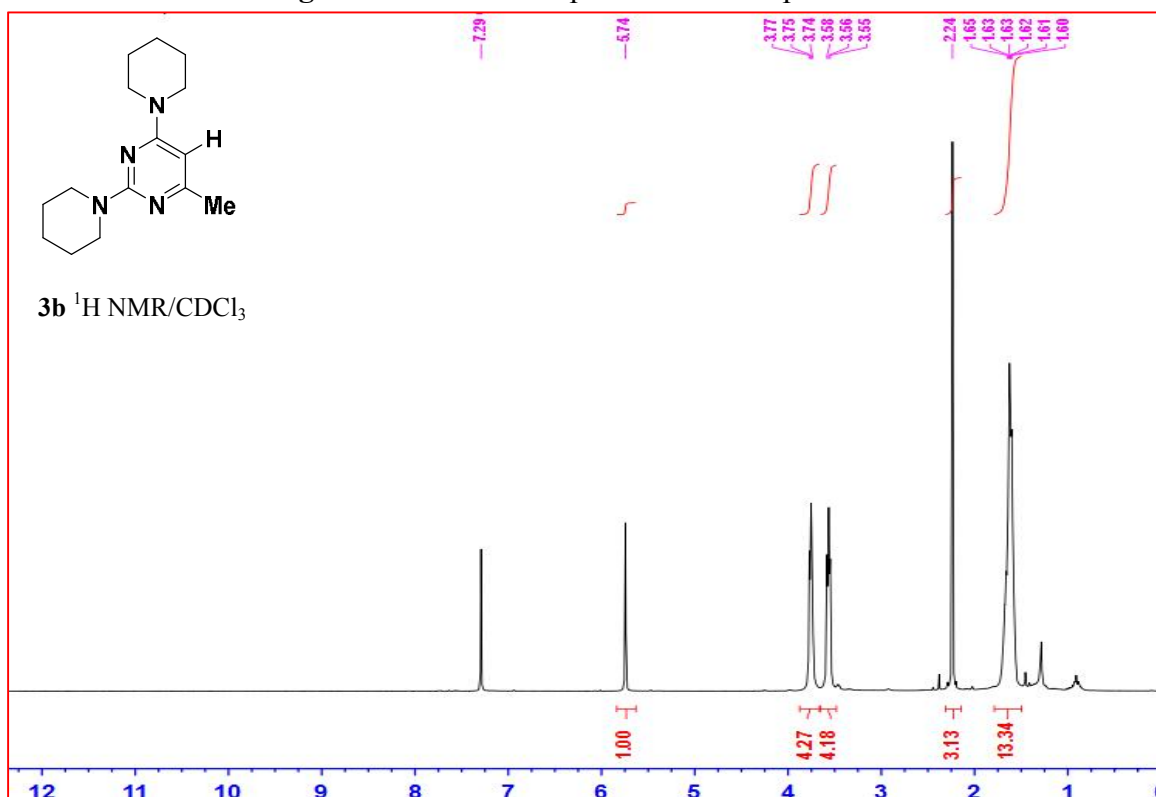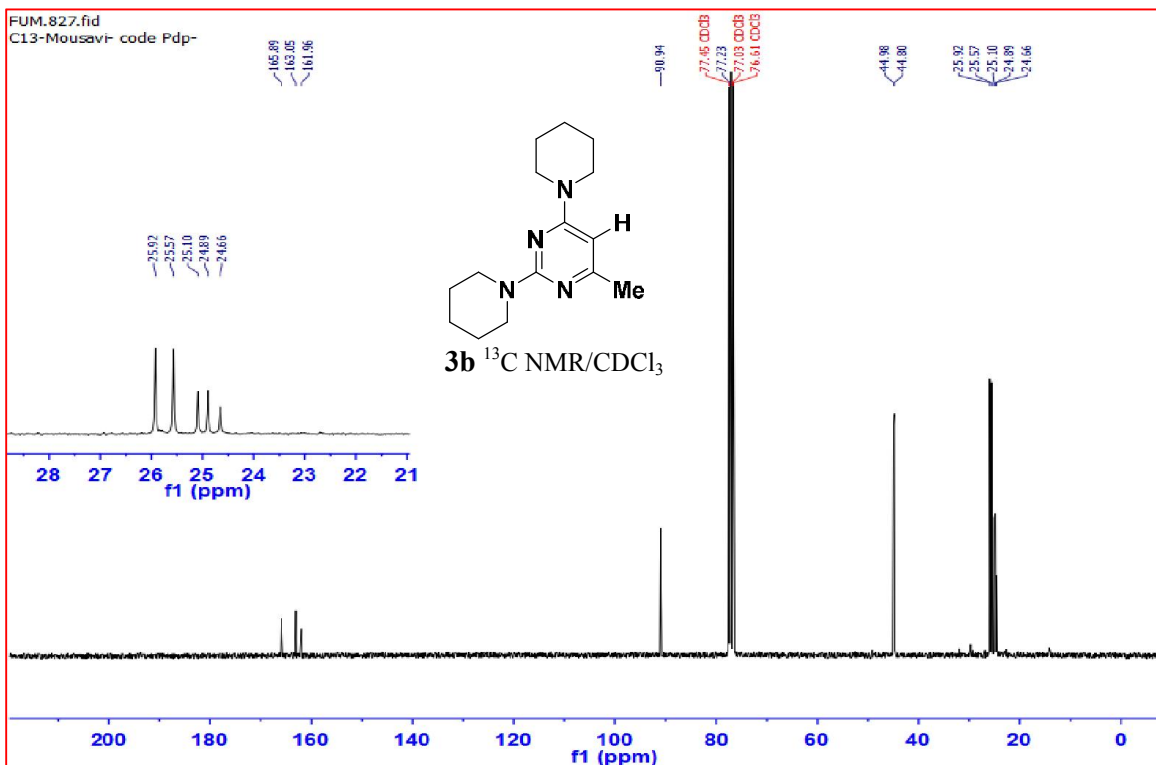

Figure S20.  $^{13}\text{C}$  NMR spectrum for compound 3b

**Figure S21.** Mass spectrum for compound **3b**

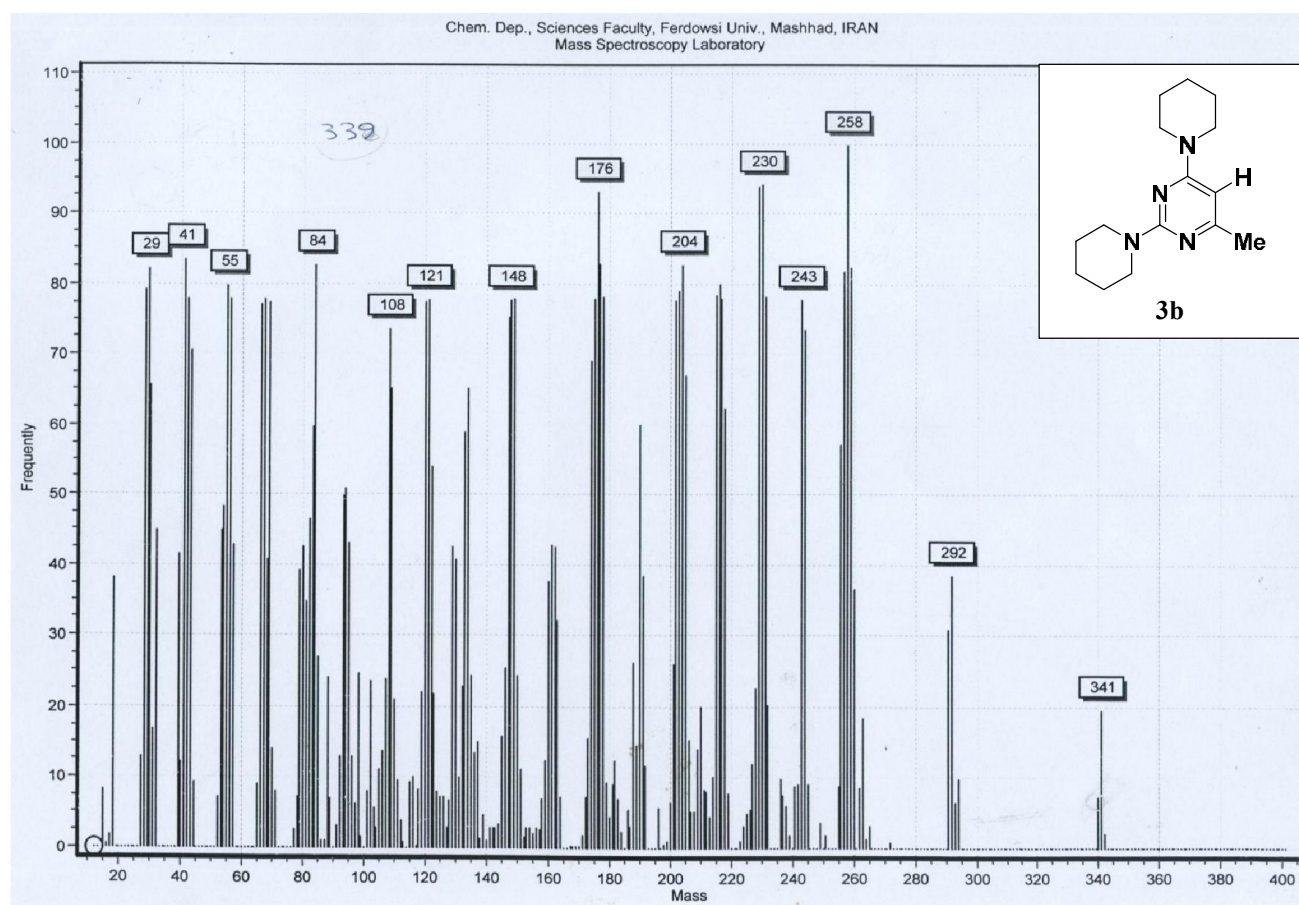

Figure S22.  $^1\text{H}$  NMR spectrum for compound 3c

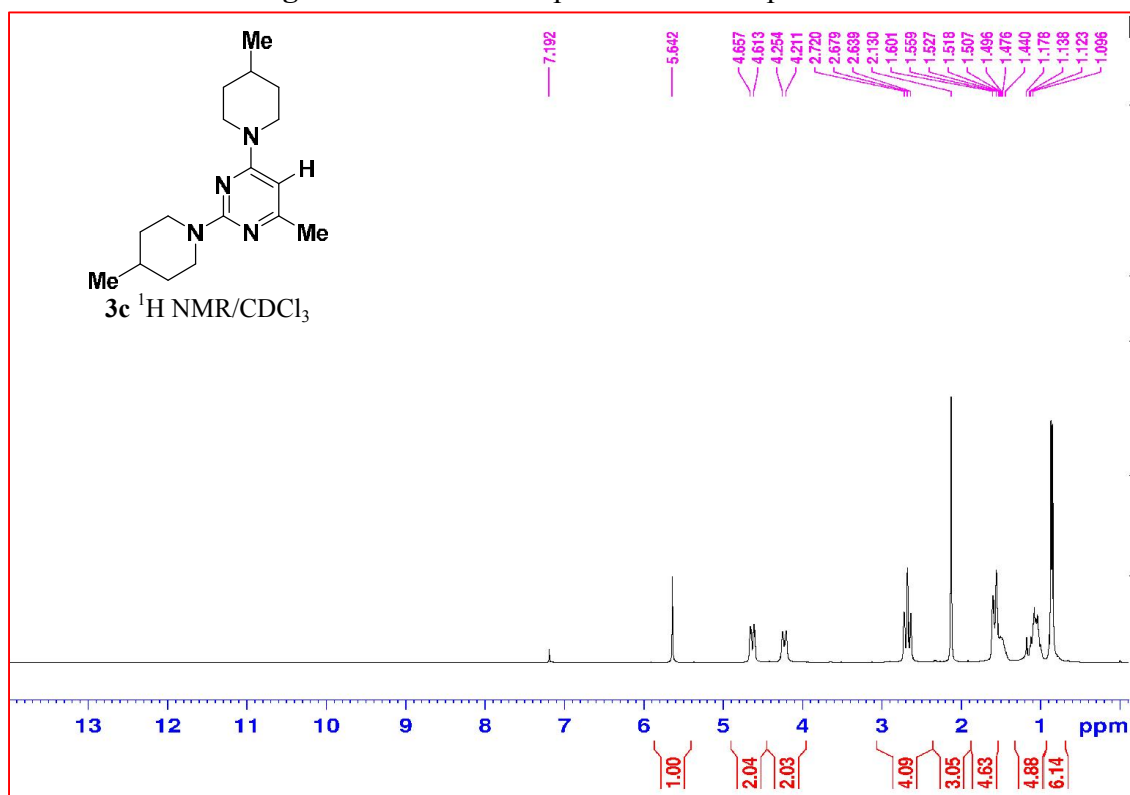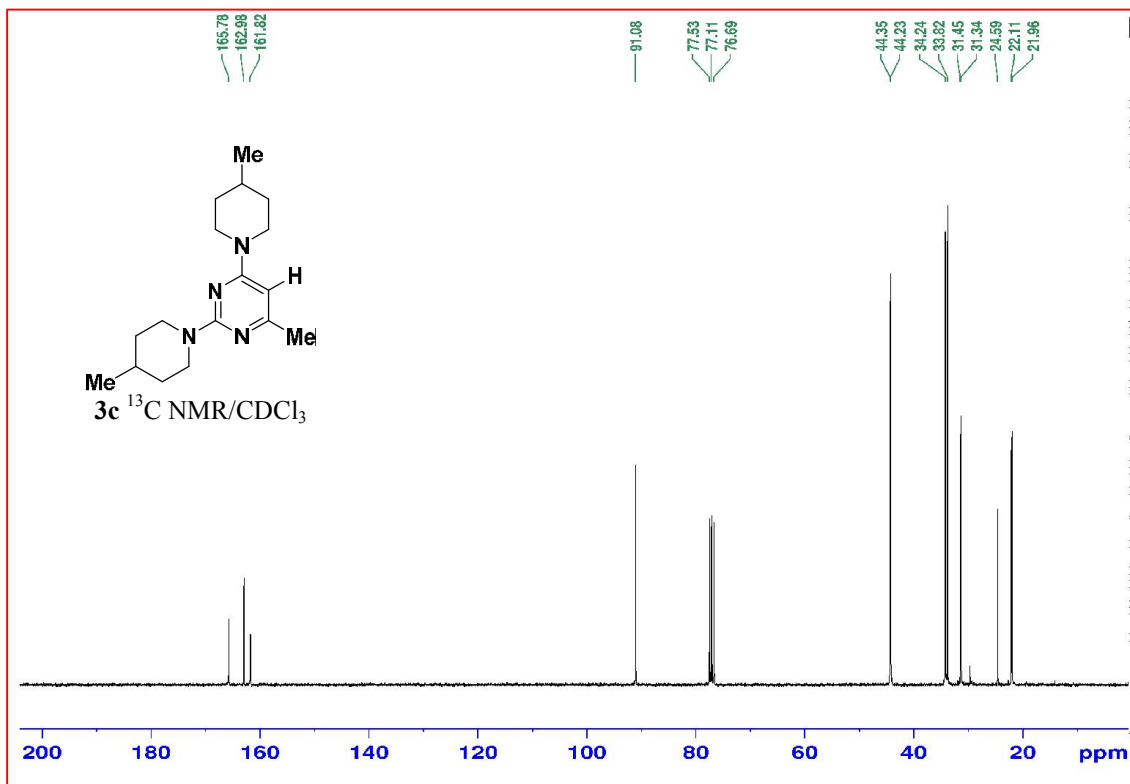

Figure S23.  $^{13}\text{C}$  NMR spectrum for compound 3c

**Figure S24.** Mass spectrum for compound **3c**

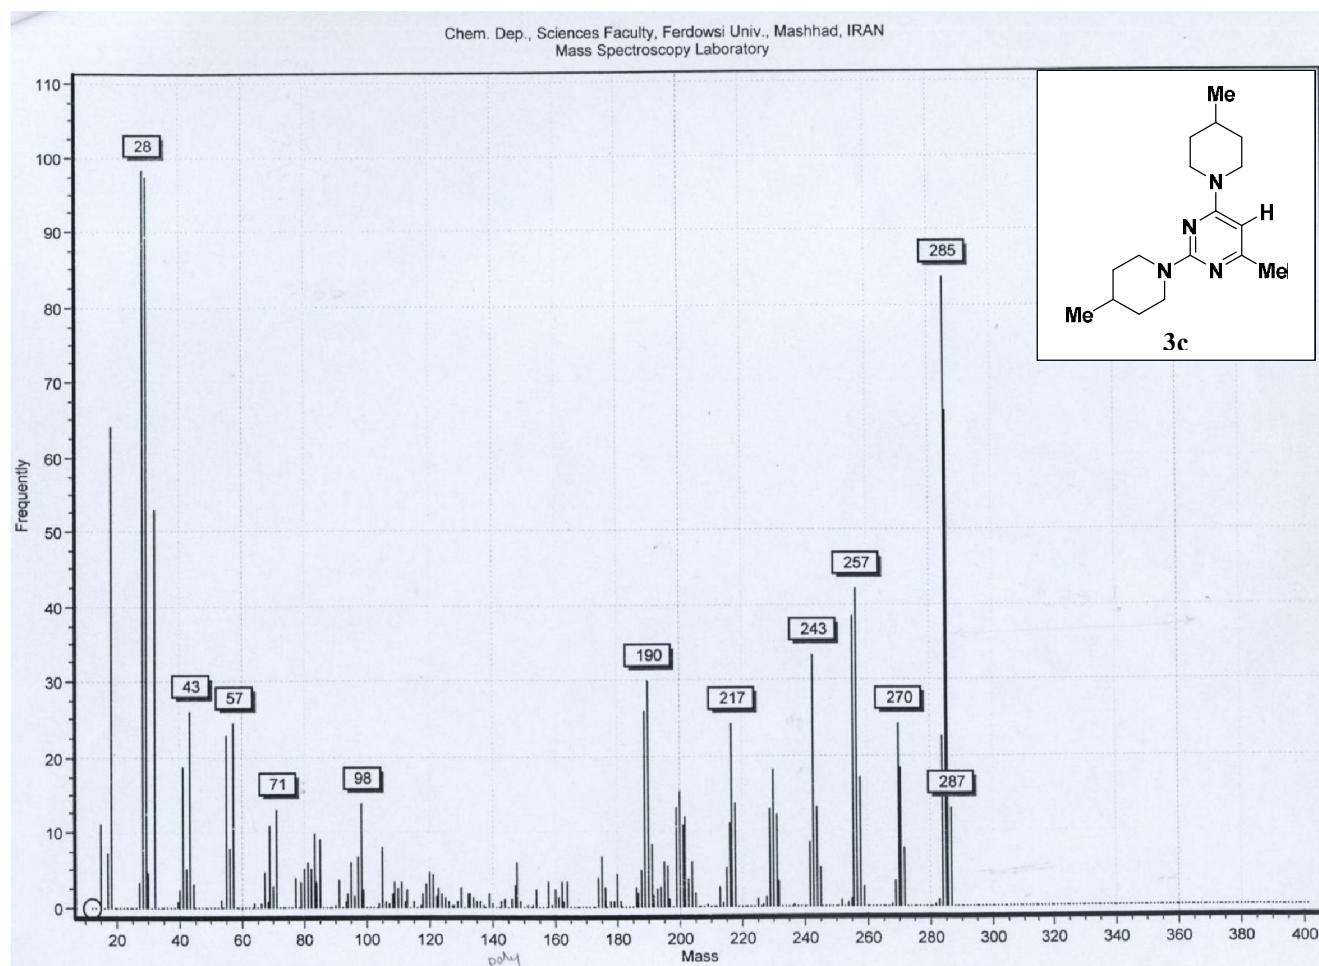



Figure S25.  $^1\text{H}$  NMR spectrum for compound 3d.

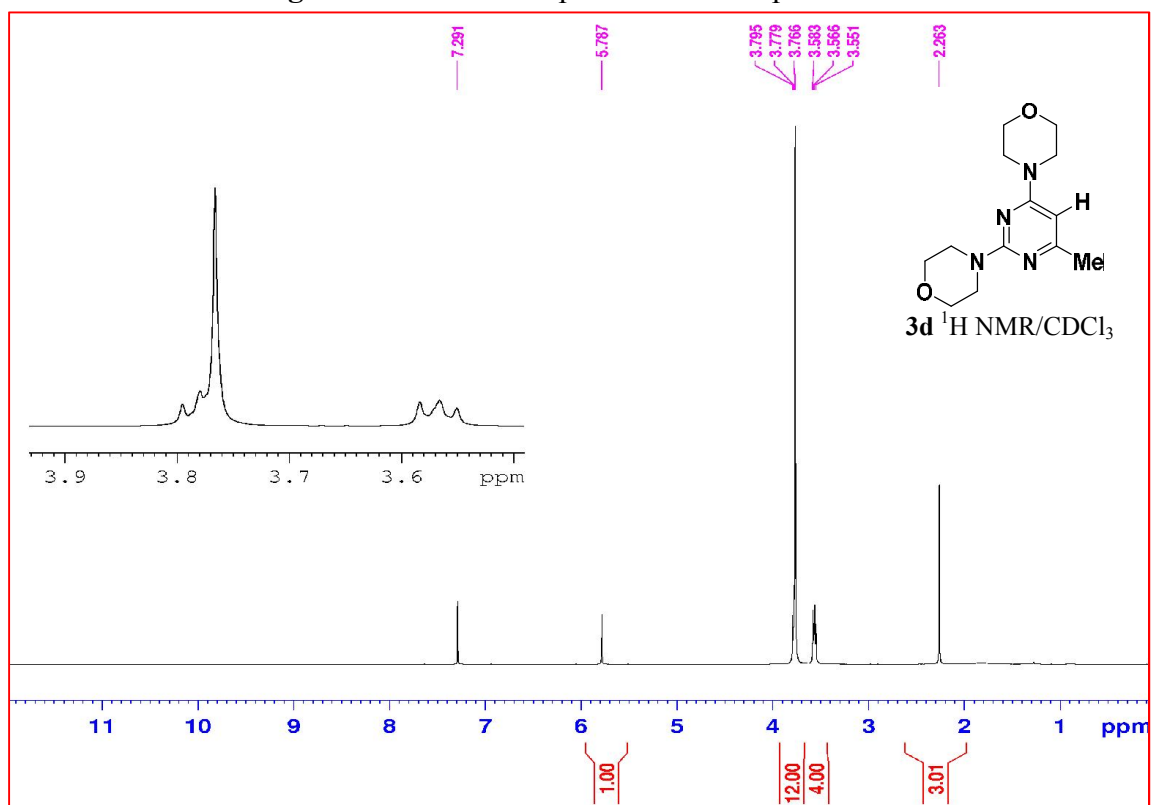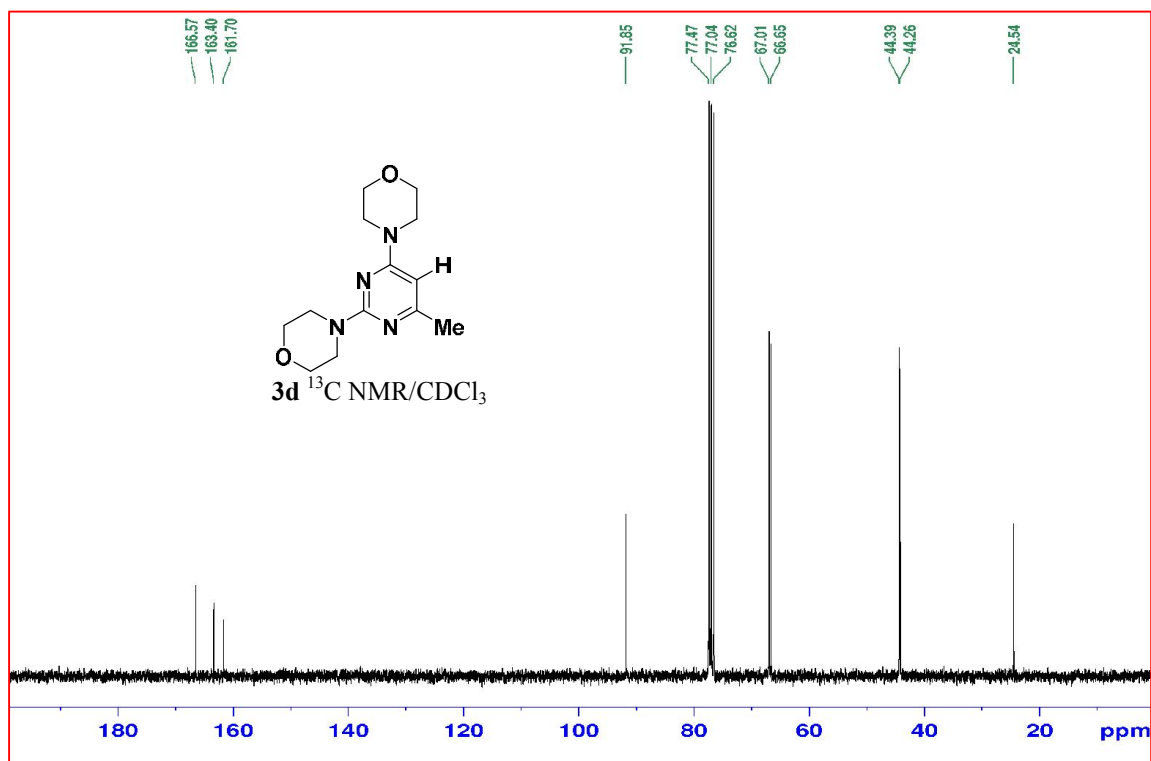

Figure S26.  $^{13}\text{C}$  NMR spectrum for compound 3d.

**Figure S27.** Mass spectrum for compound 3d.

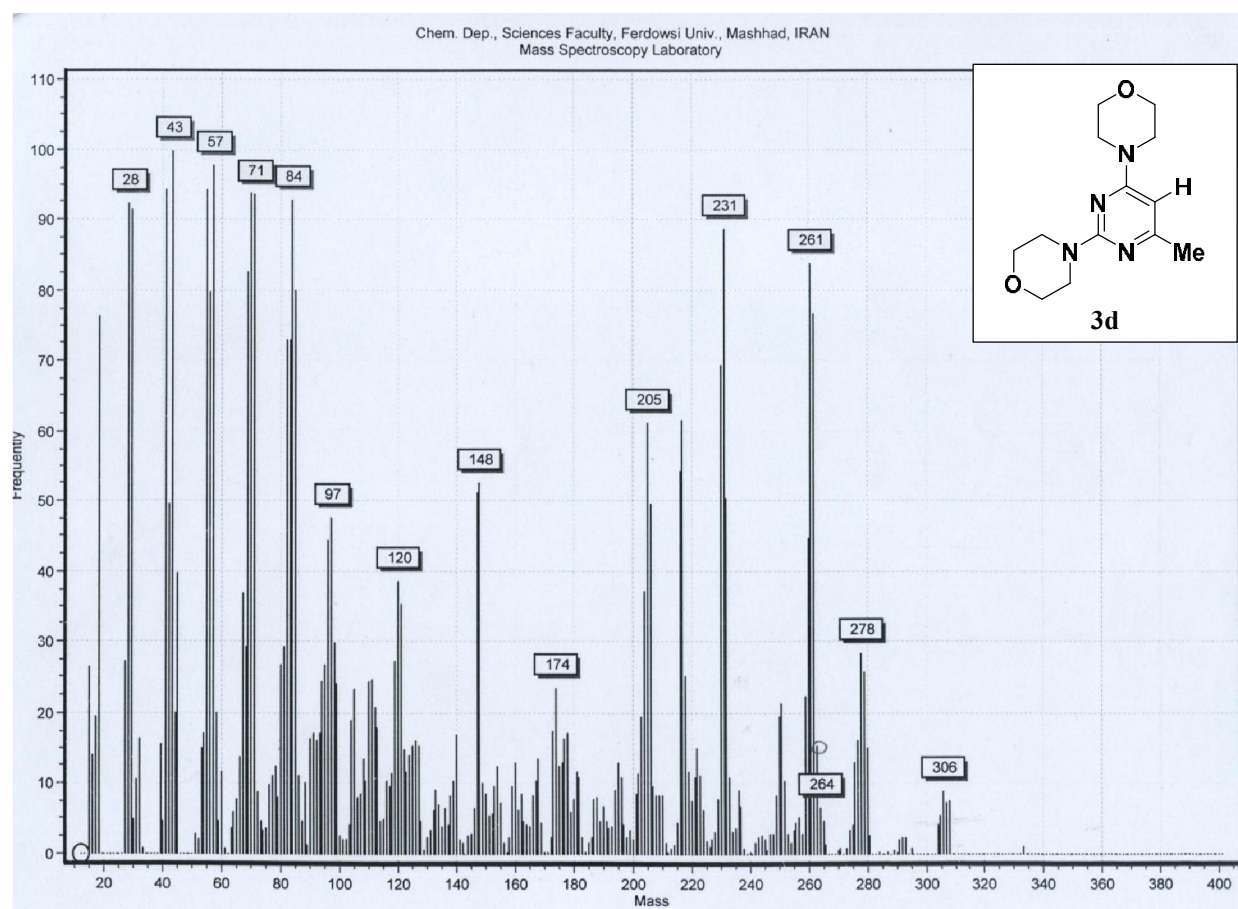



**Figure S28.**  $^1\text{H}$  NMR spectrum for compound 7a.

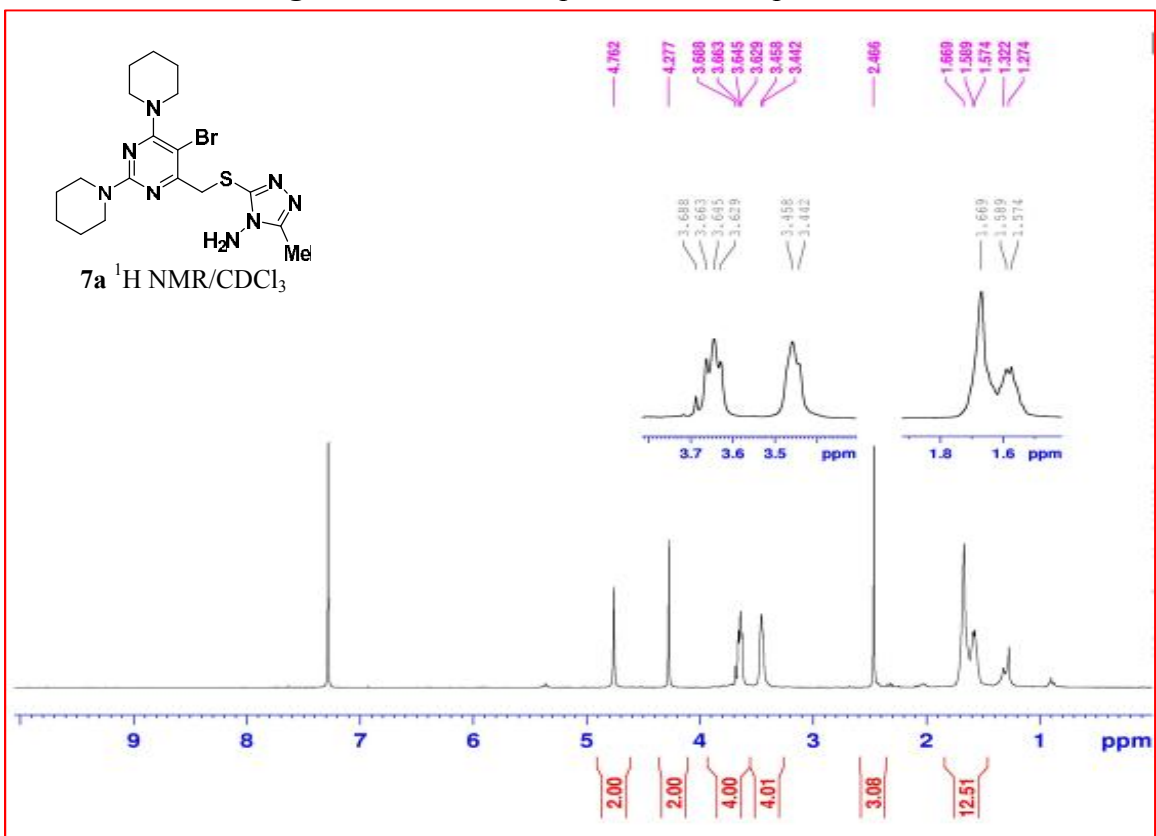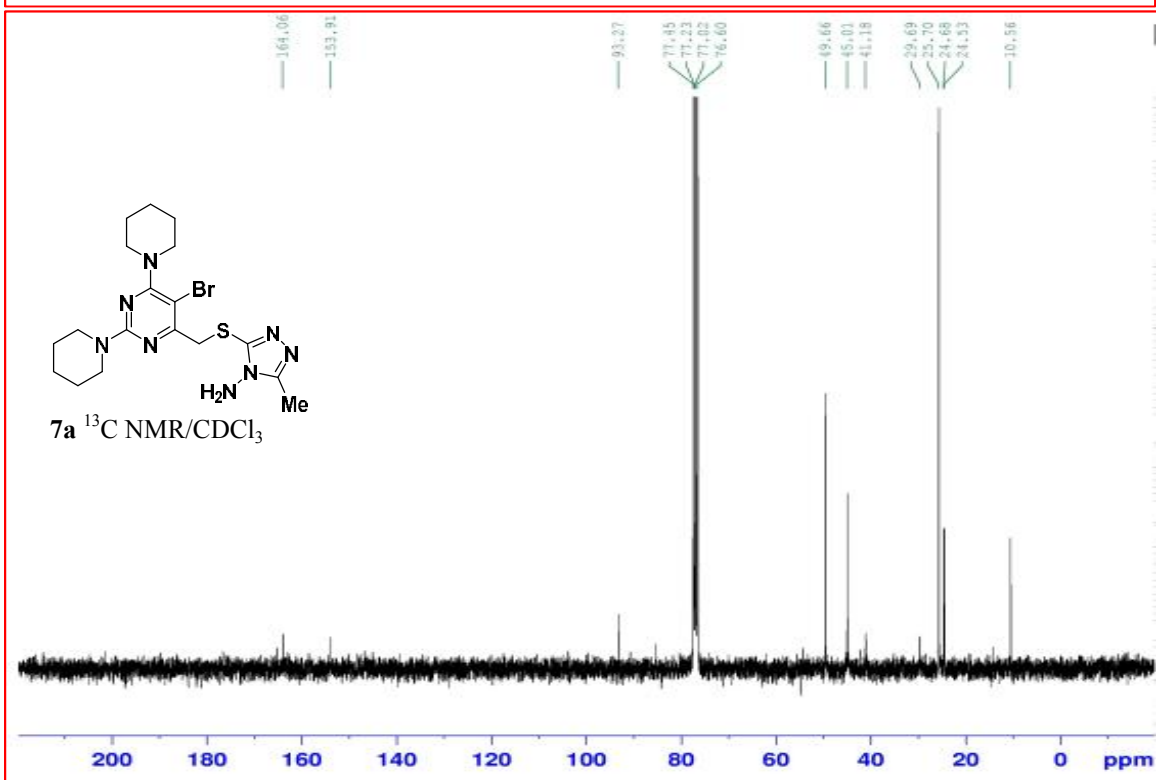

**Figure S29.**  $^{13}\text{C}$  NMR spectrum for compound 7a.

**Figure S30.** D<sub>2</sub>O exchange-<sup>1</sup>H NMR spectrum for compound 7a.

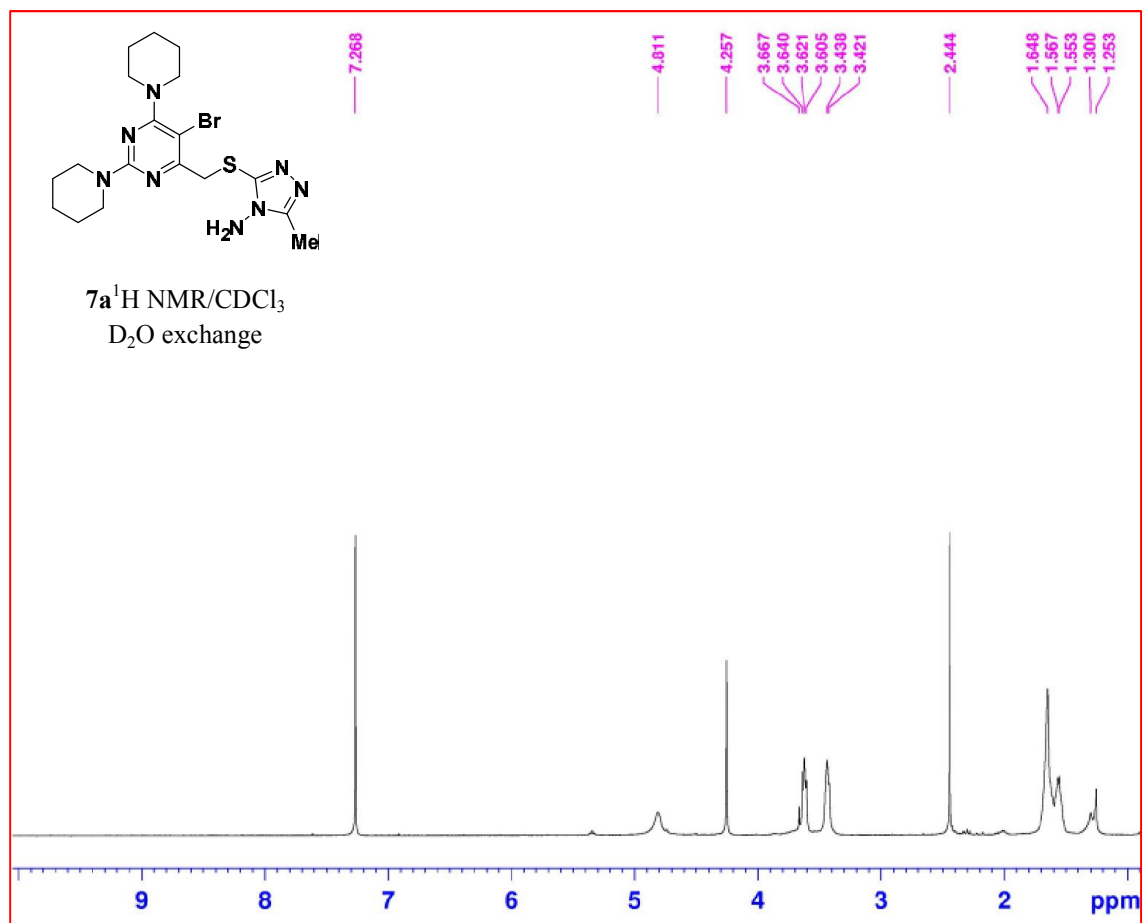

**Figure S31.** Mass spectrum for compound 7a.

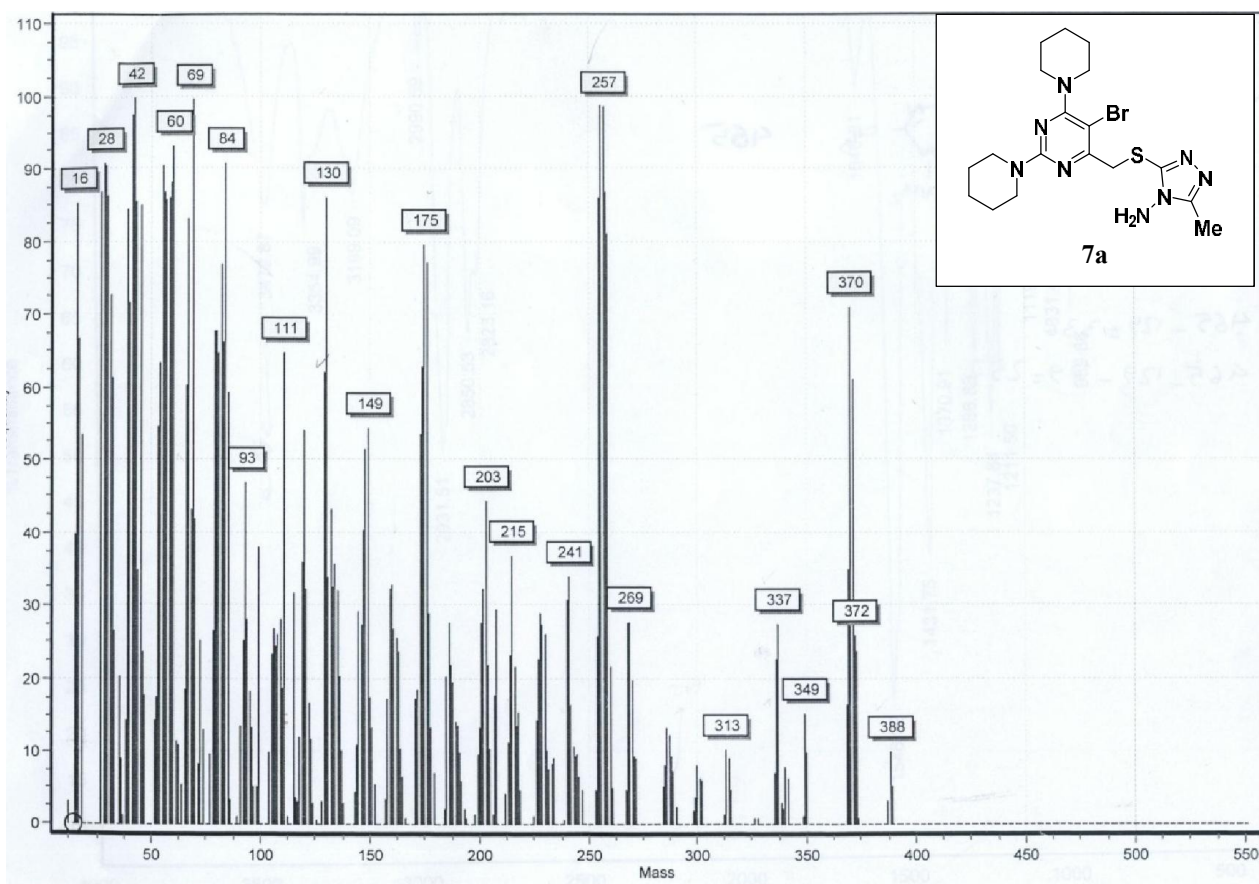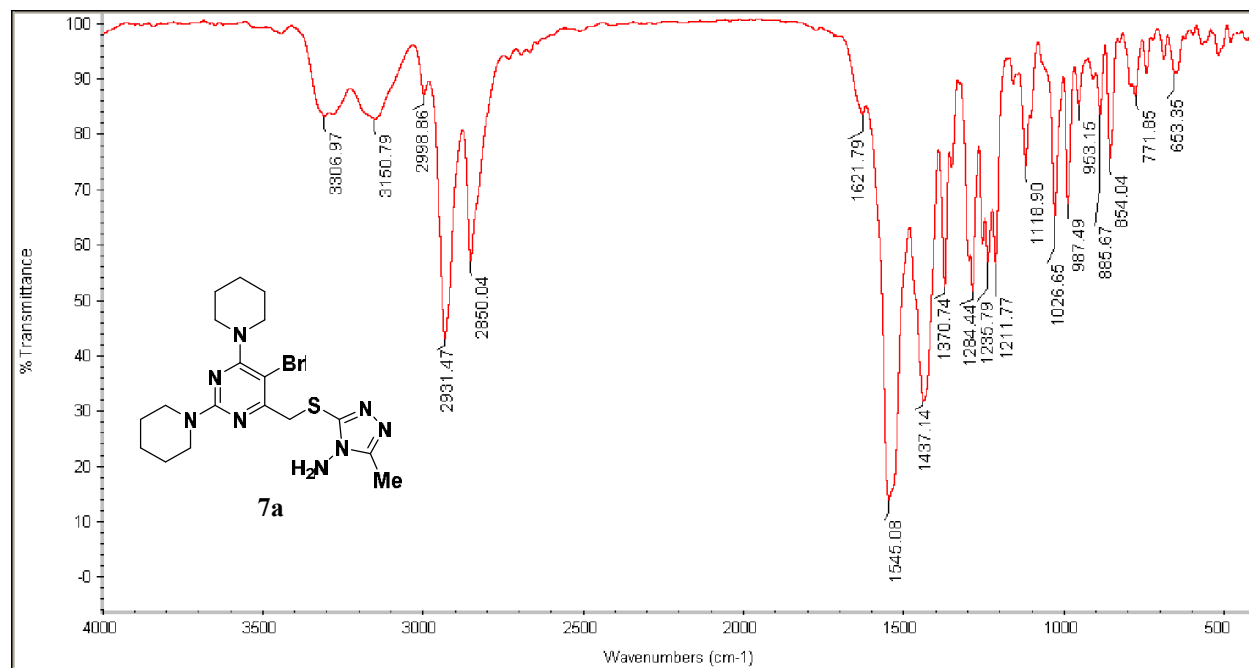

**Figure S32.** FTIR spectrum for compound 7a.

Figure S33.  $^1\text{H}$  NMR spectrum for compound 7b.

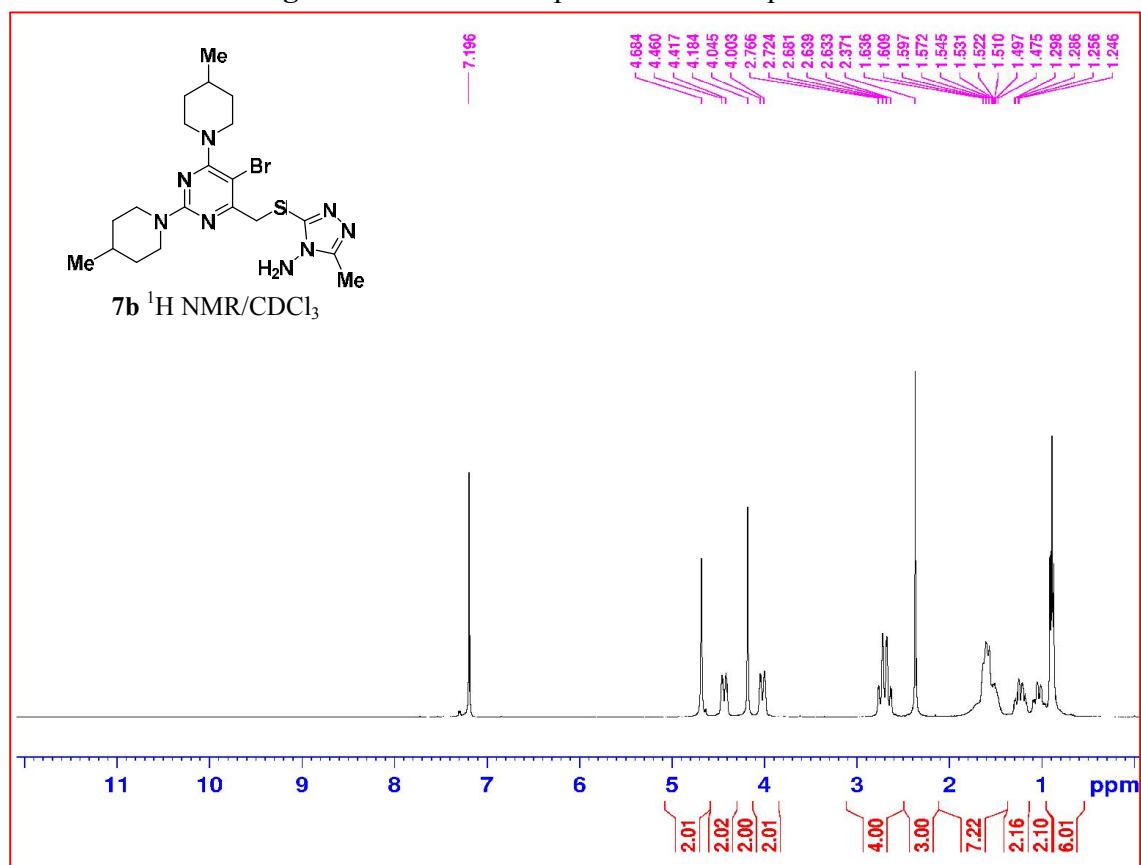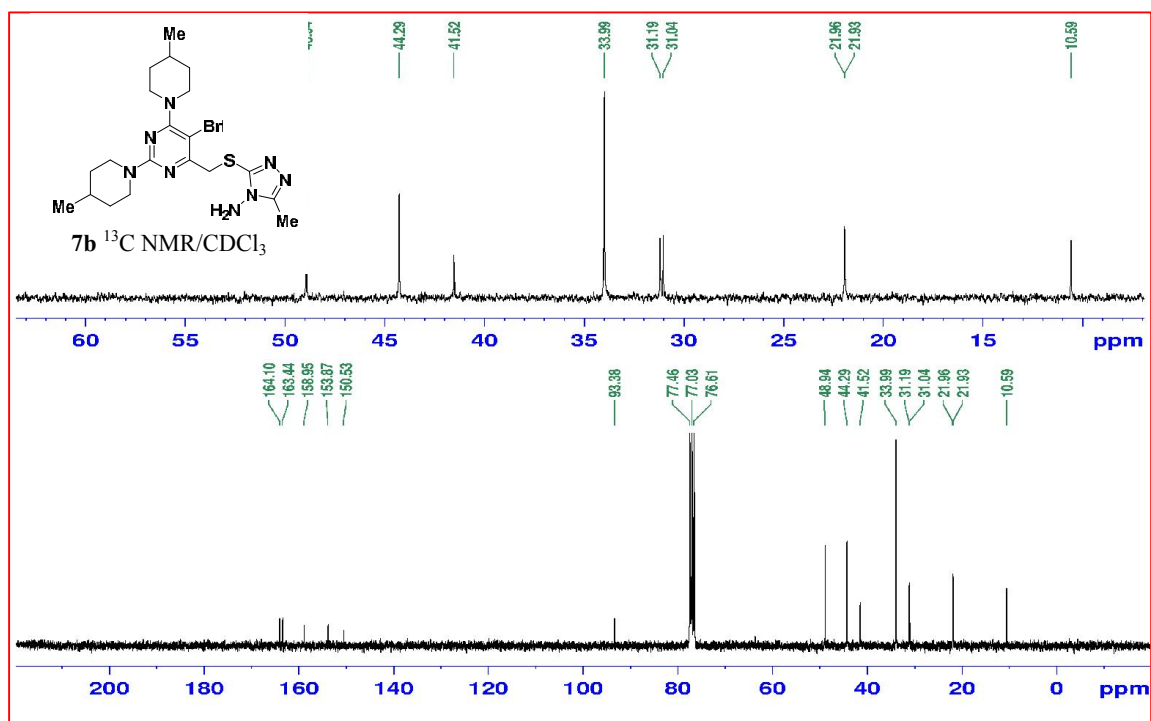

Figure S34.  $^{13}\text{C}$  NMR spectrum for compound 7b.

Figure S35. Mass spectrum for compound 7b.

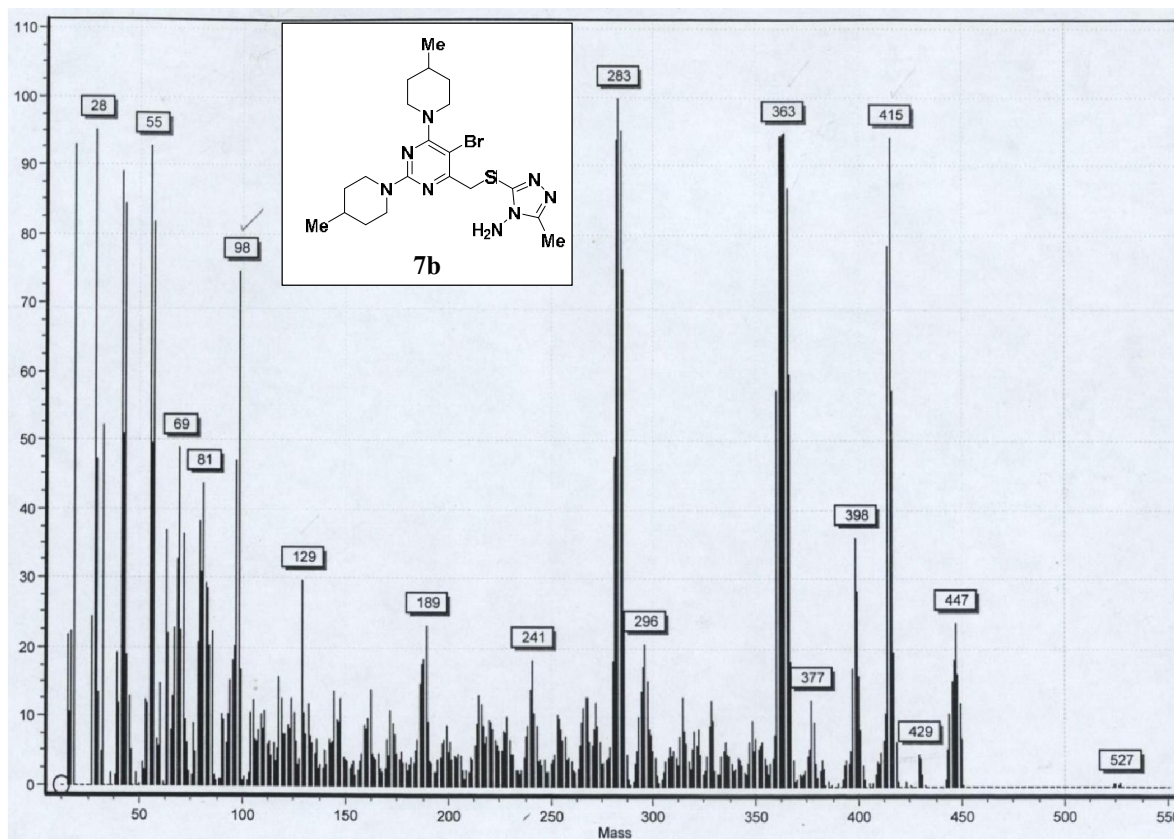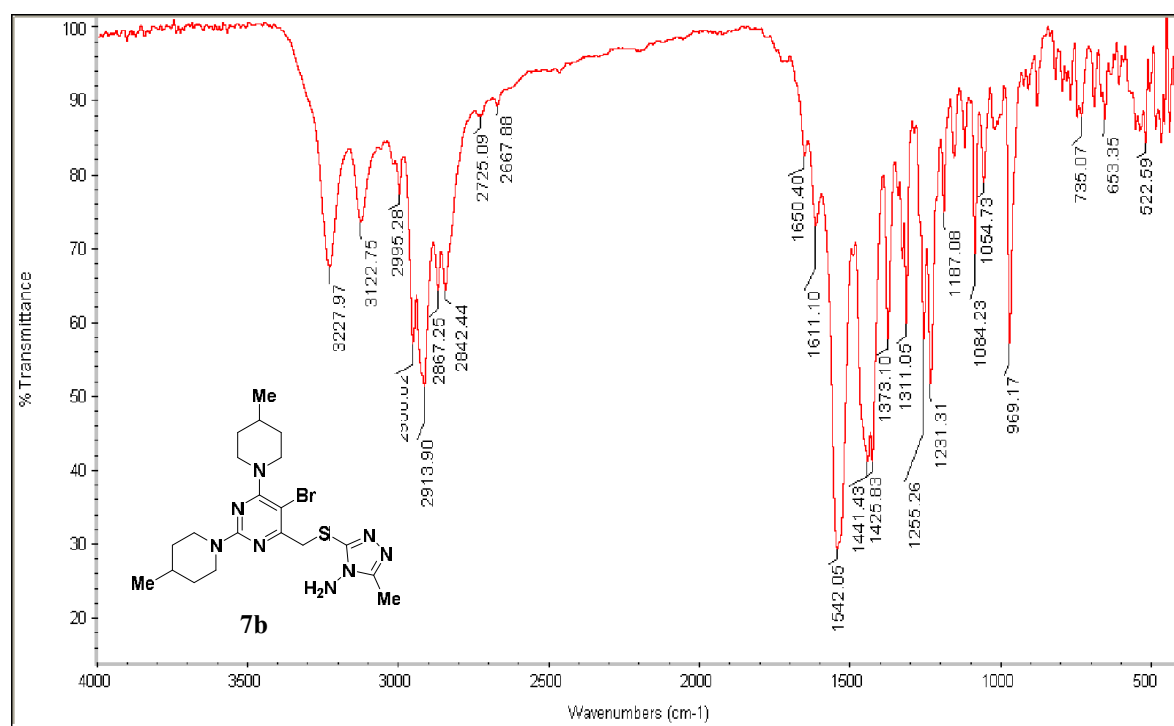

Figure S36. FTIR spectrum for compound 7b.

Figure S37.  $^1\text{H}$  NMR spectrum for compound 7c.

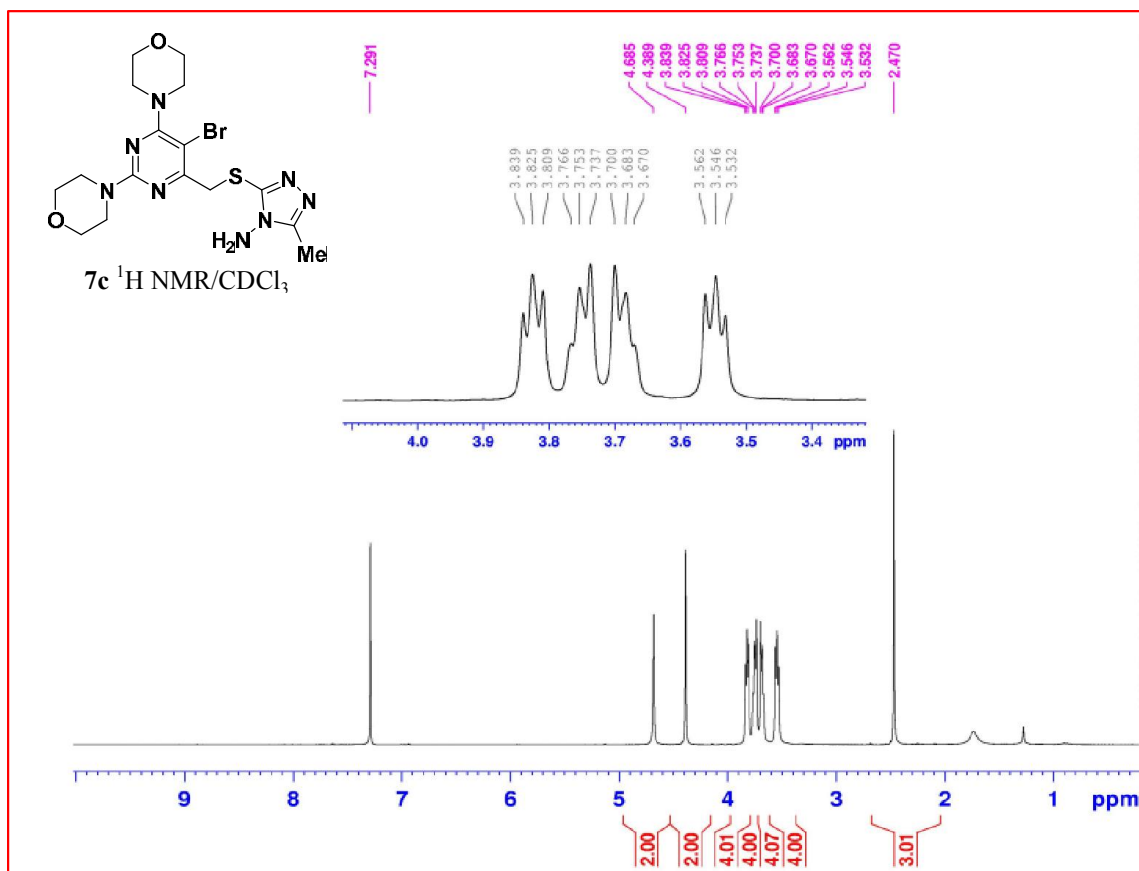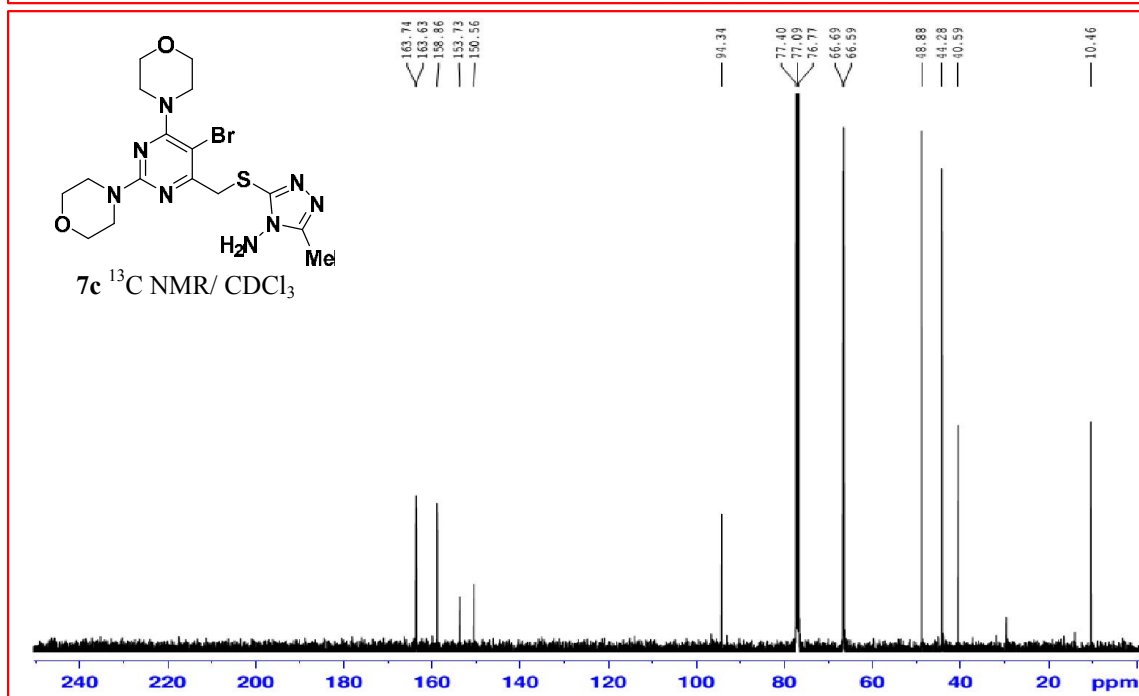

Figure S38.  $^{13}\text{C}$  NMR spectrum for compound 7c.

**Figure S39.** D<sub>2</sub>O exchange-<sup>1</sup>H NMR spectrum for compound **7c**.

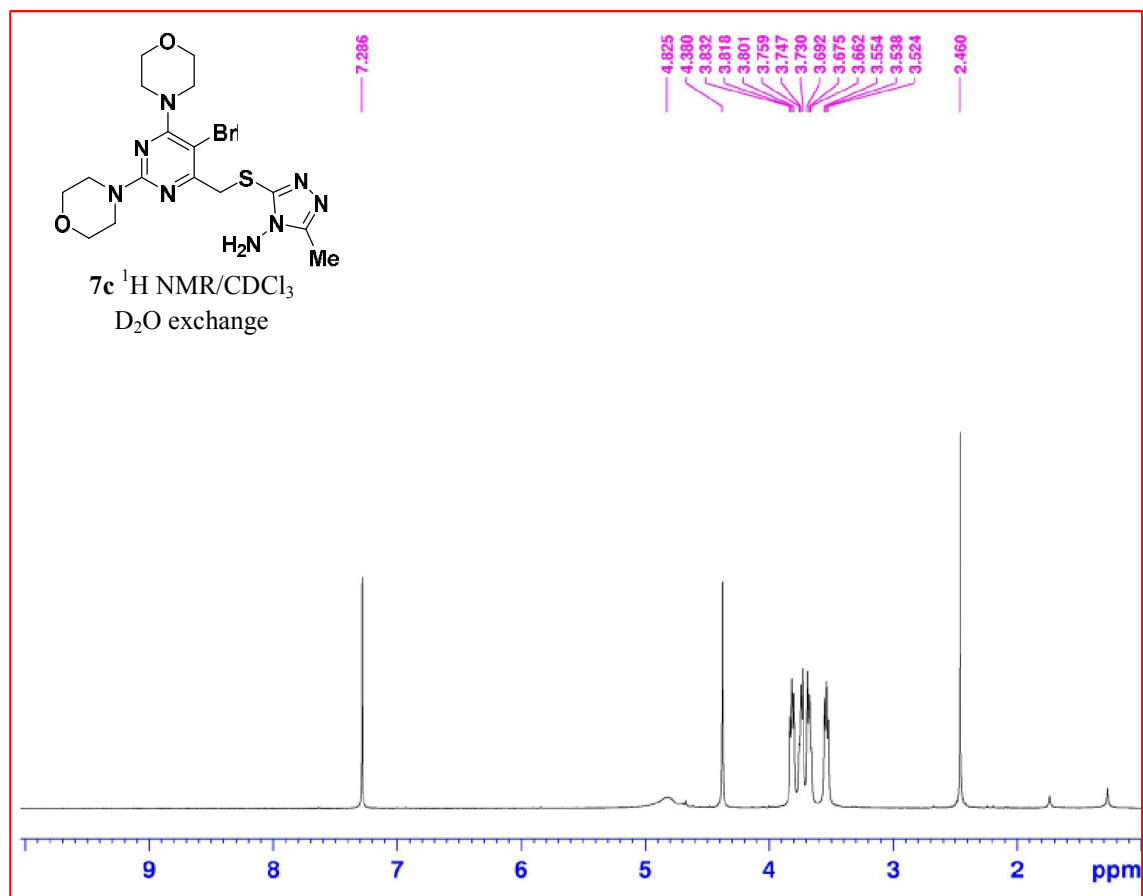



Figure S40. Mass spectrum for compound 7c.

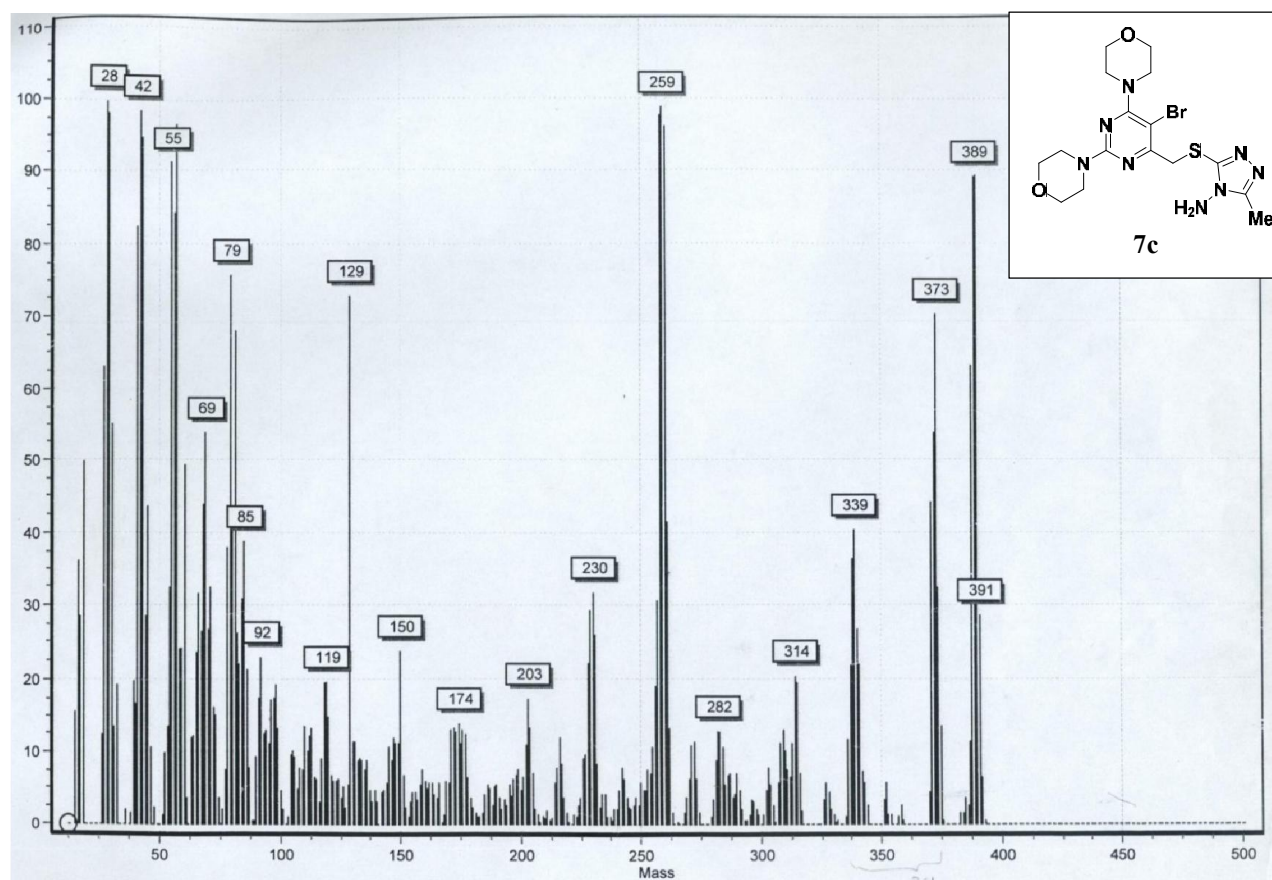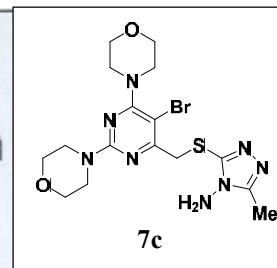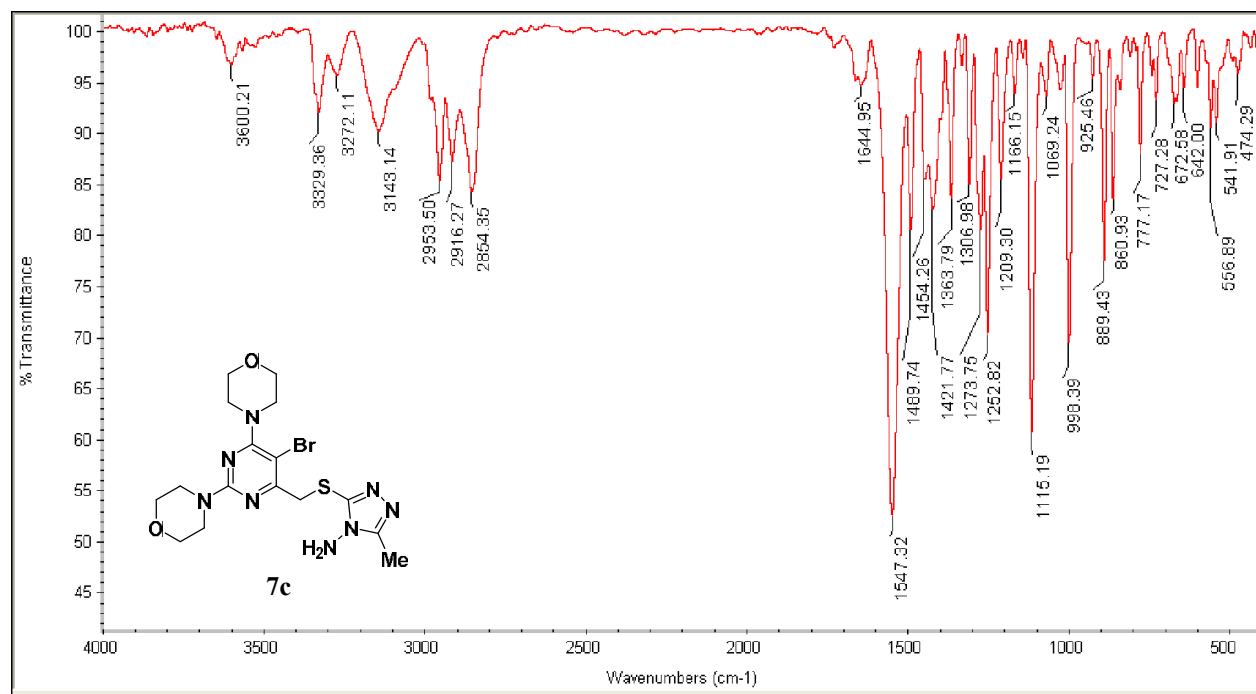

Figure S41. FTIR spectrum for compound 7c.



Figure S42.  $^1\text{H}$  NMR spectrum for compound 7d.

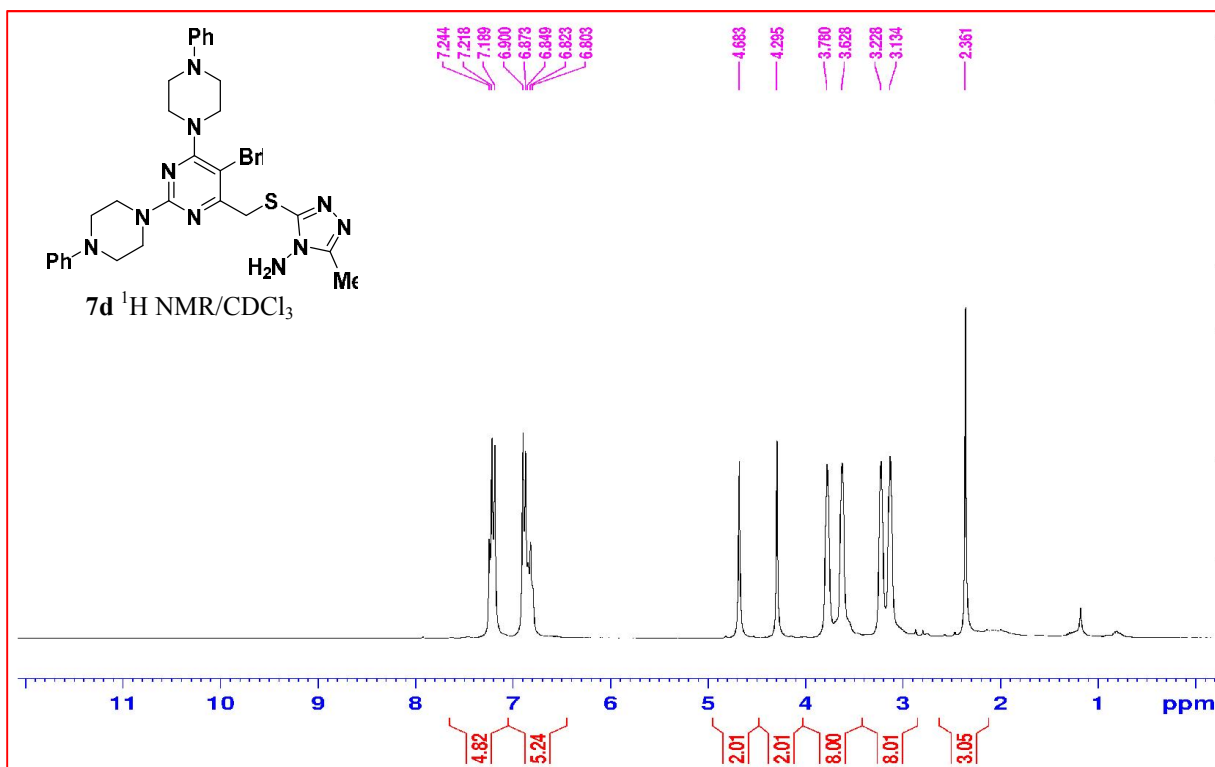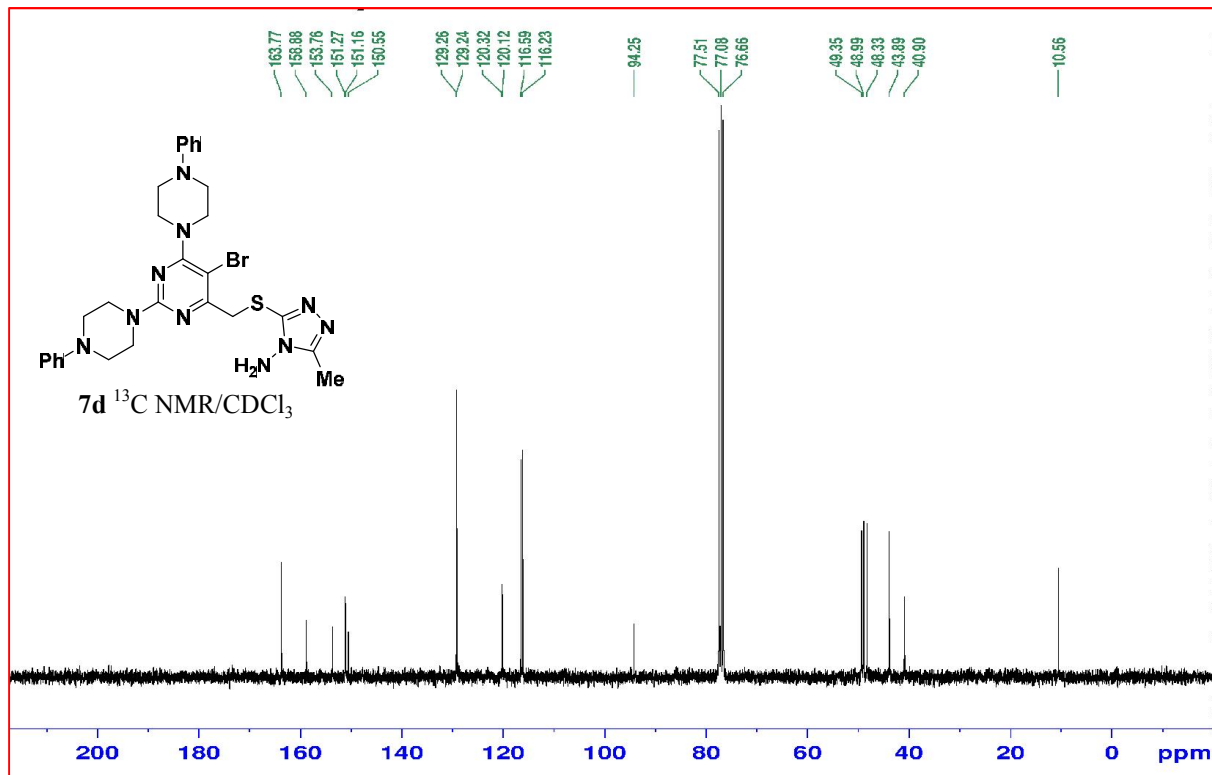

Figure S43.  $^{13}\text{C}$  NMR spectrum for compound 7d.

**Figure S44.** Mass spectrum for compound 7d.

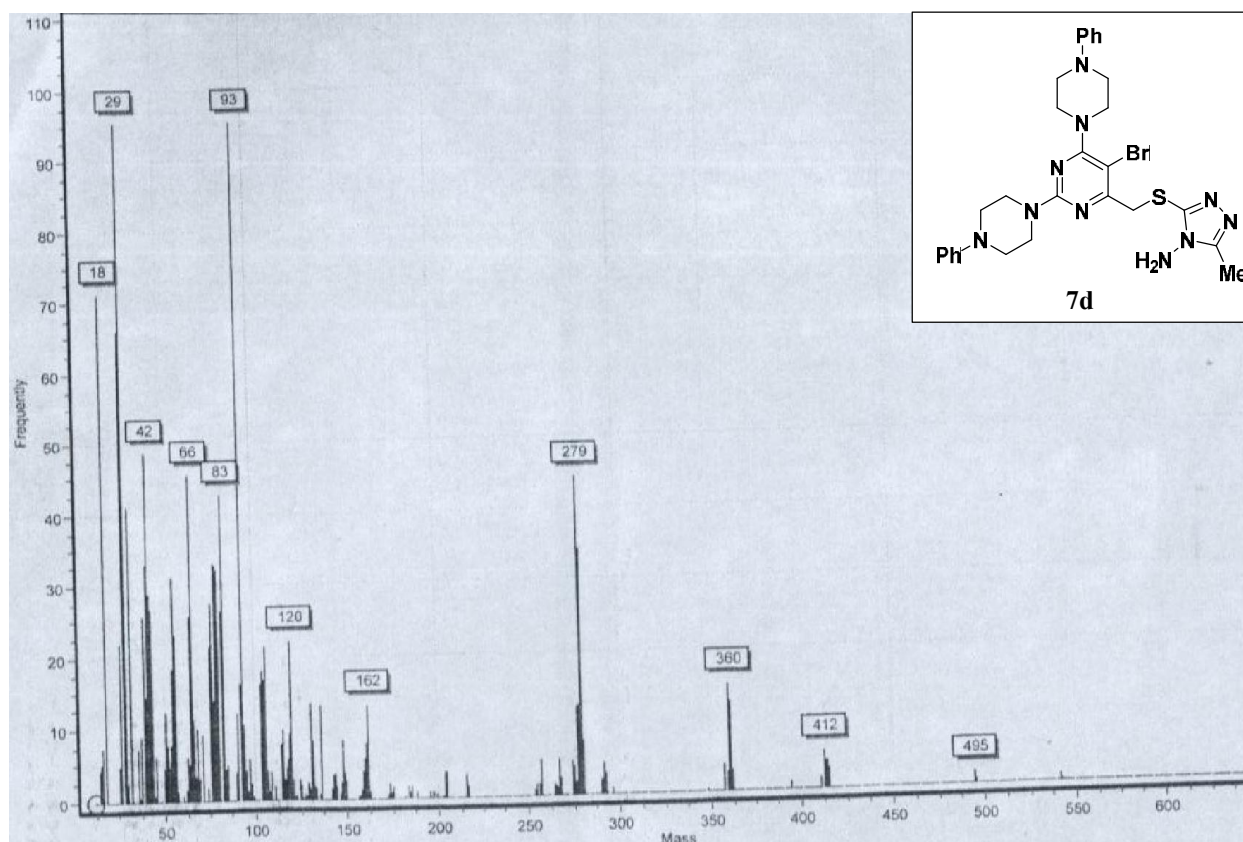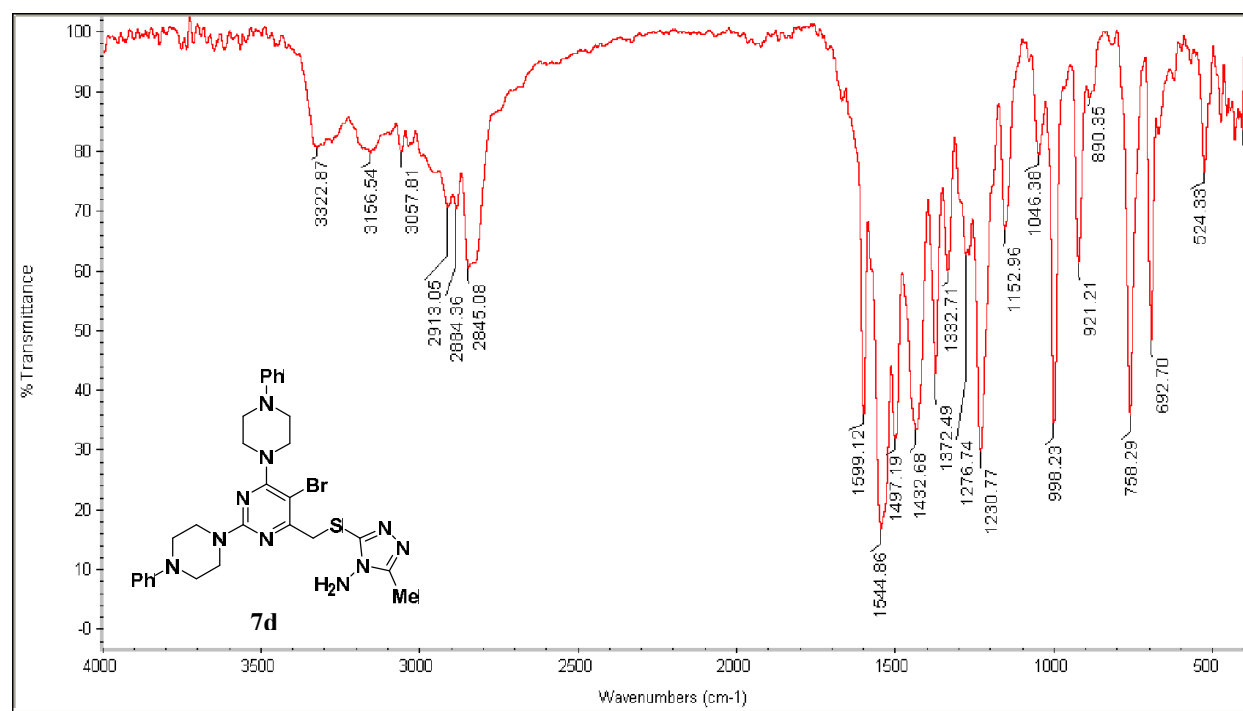

**Figure S45.** FTIR spectrum for compound 7d.

Figure S46.  $^1\text{H}$  NMR spectrum for compound 7e.

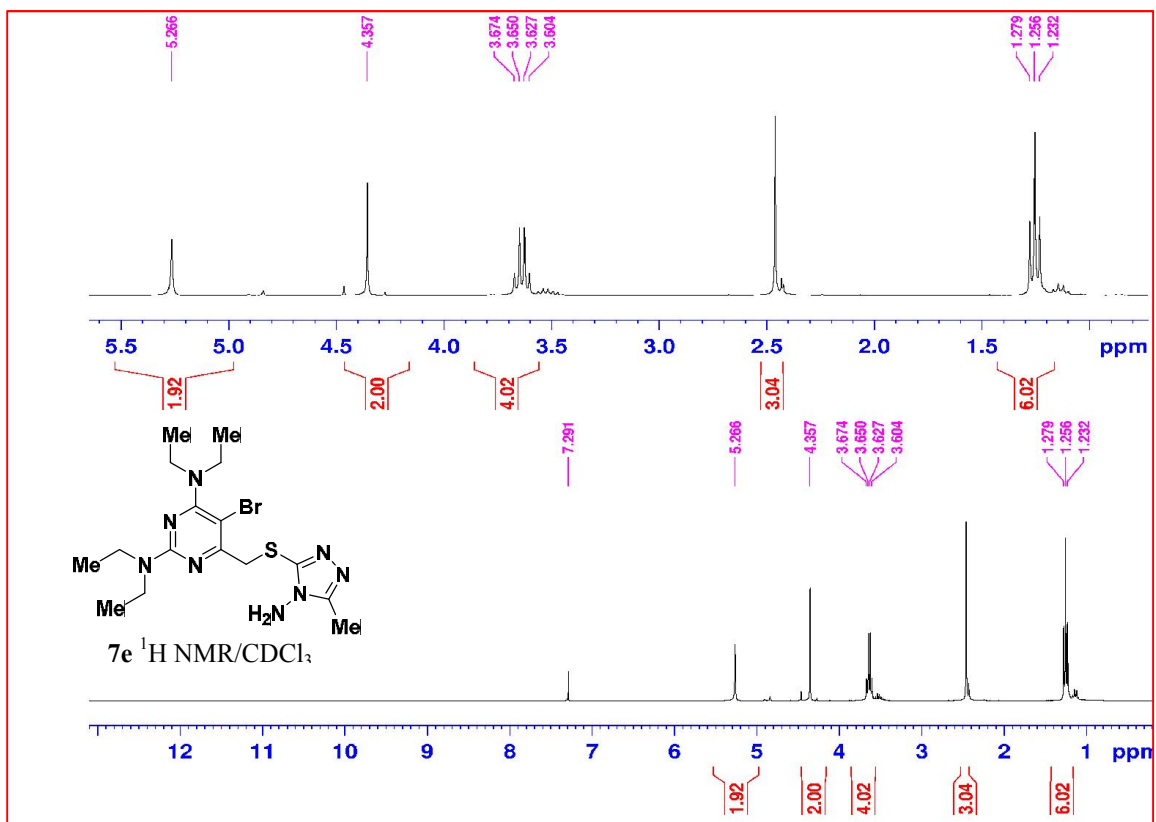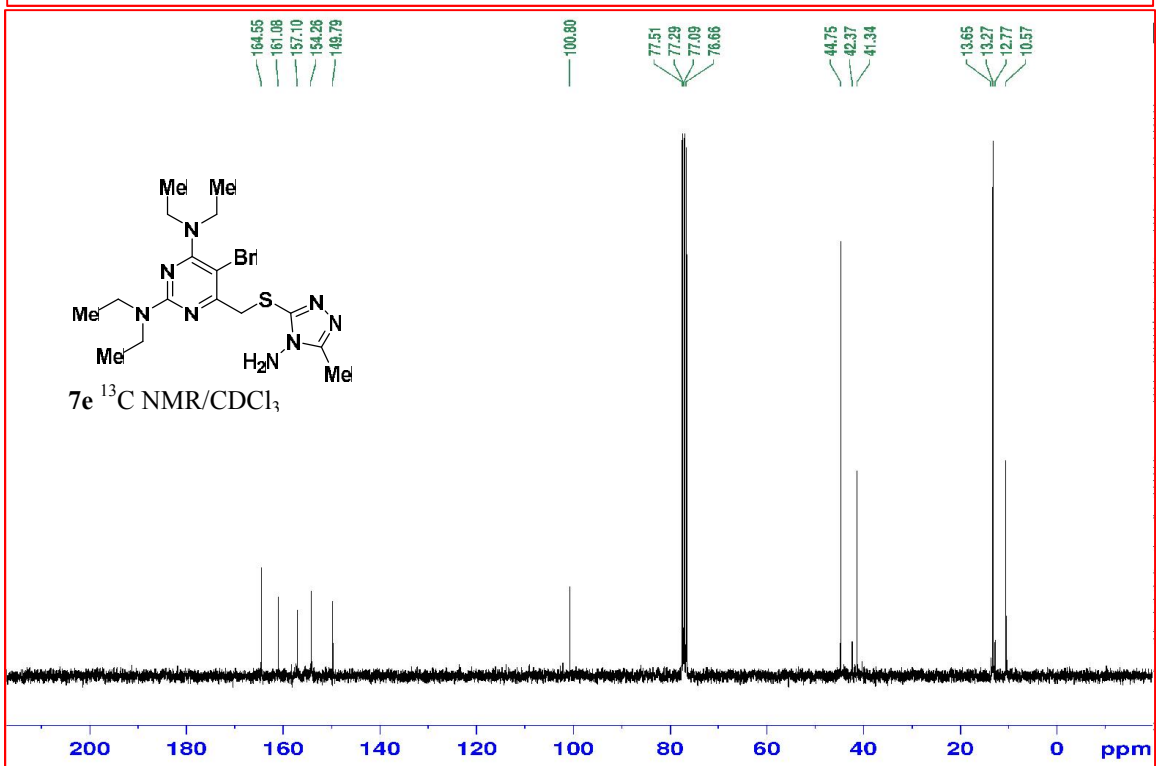

Figure S47.  $^{13}\text{C}$  NMR spectrum for compound 7e.

**Figure S48.** Mass spectrum for compound 7e.

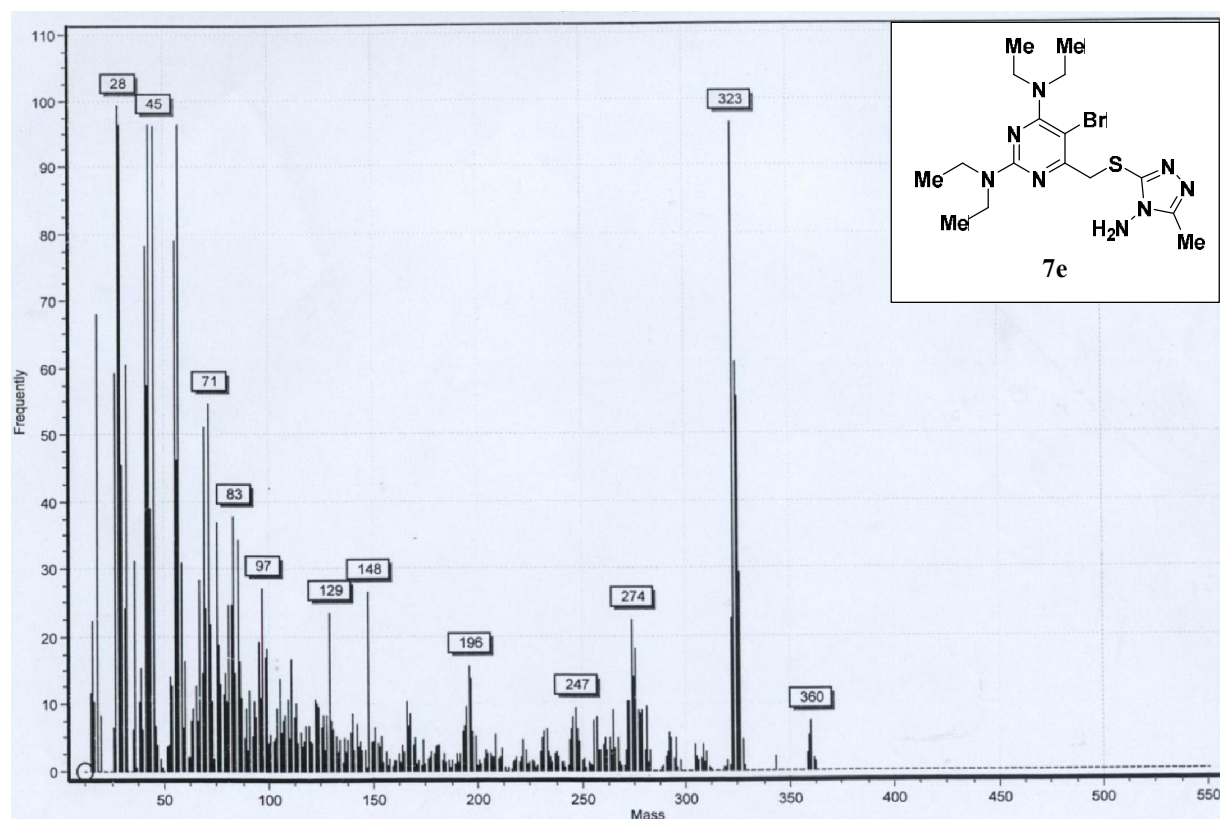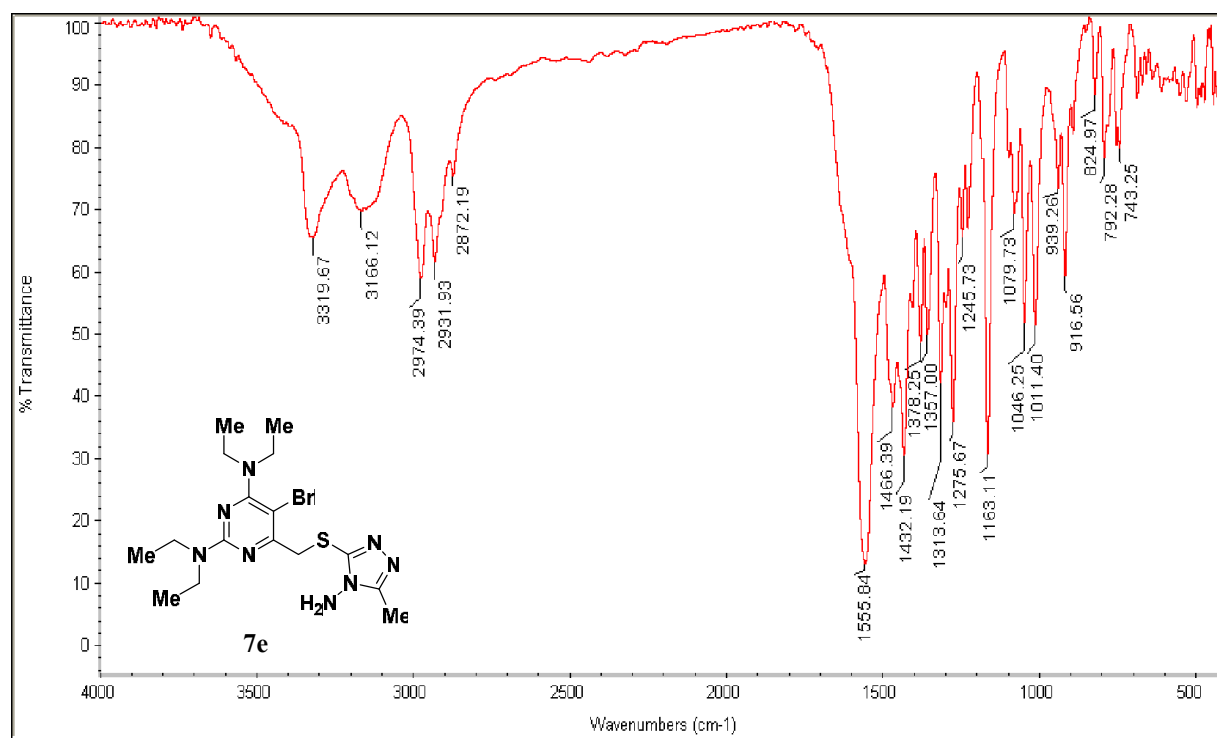

**Figure S49.** FTIR spectrum for compound 7e.

Figure S50.  $^1\text{H}$  NMR spectrum for compound 8a.

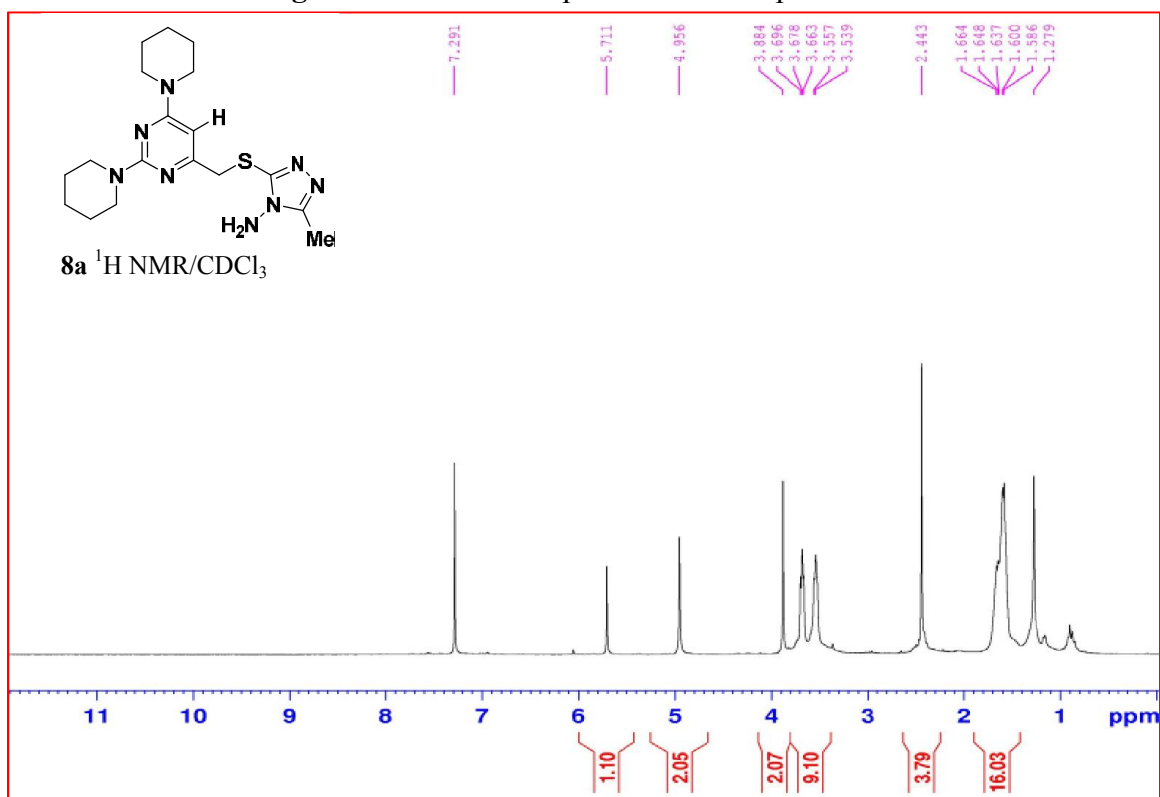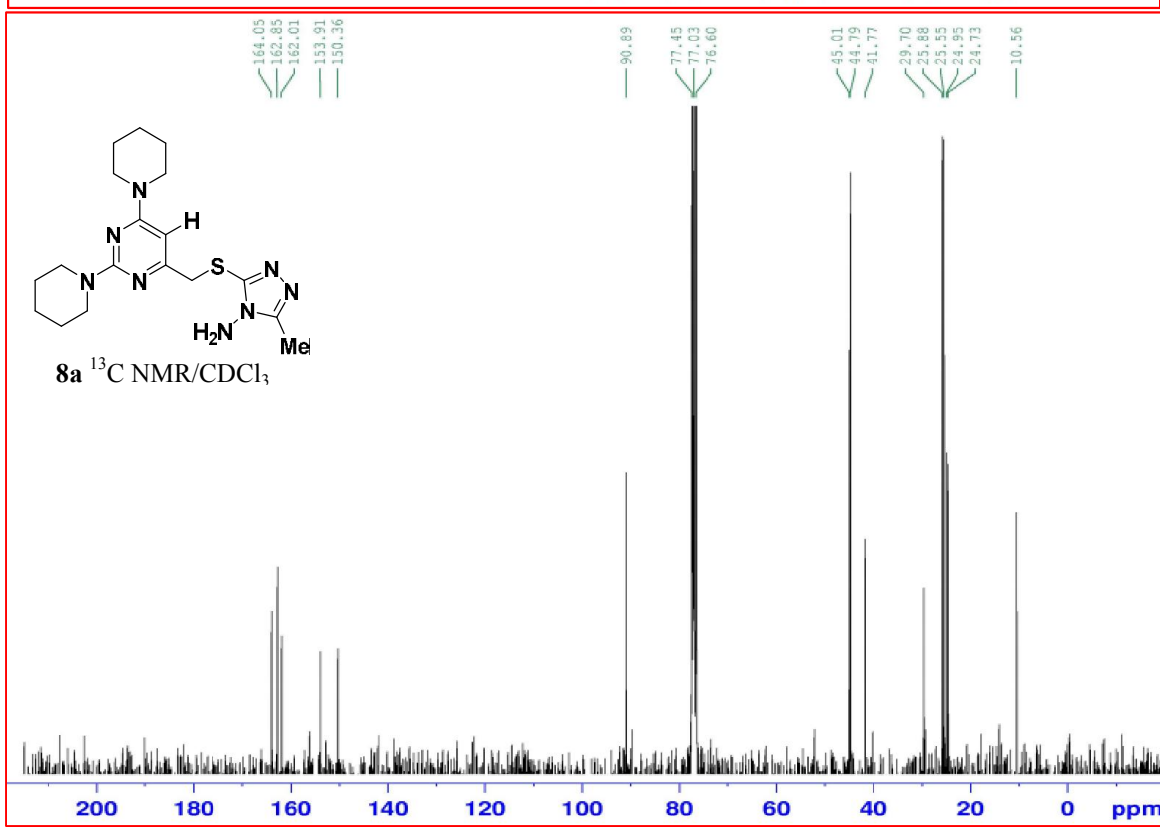

Figure S51.  $^{13}\text{C}$  NMR spectrum for compound 8a.

**Figure S52.** D<sub>2</sub>O exchange-<sup>1</sup>H NMR spectrum for compound 8a.

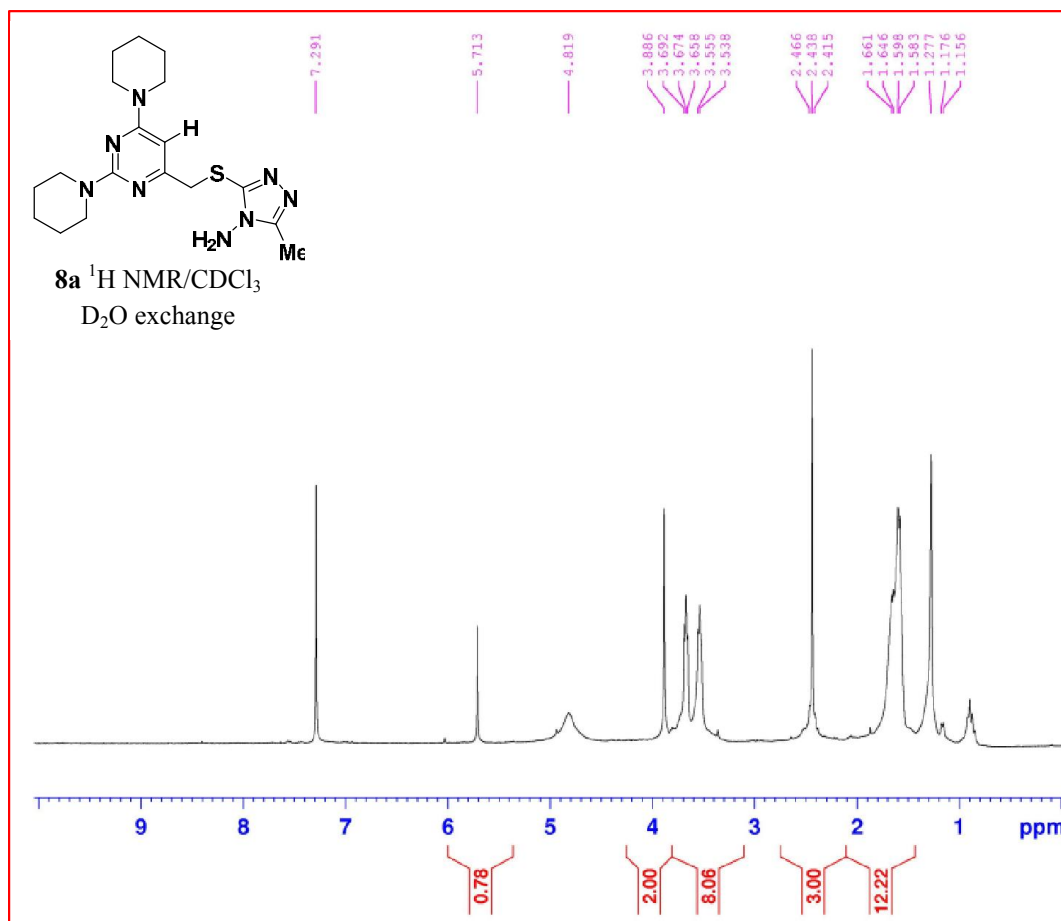

**Figure S53.** Mass spectrum for compound 8a.

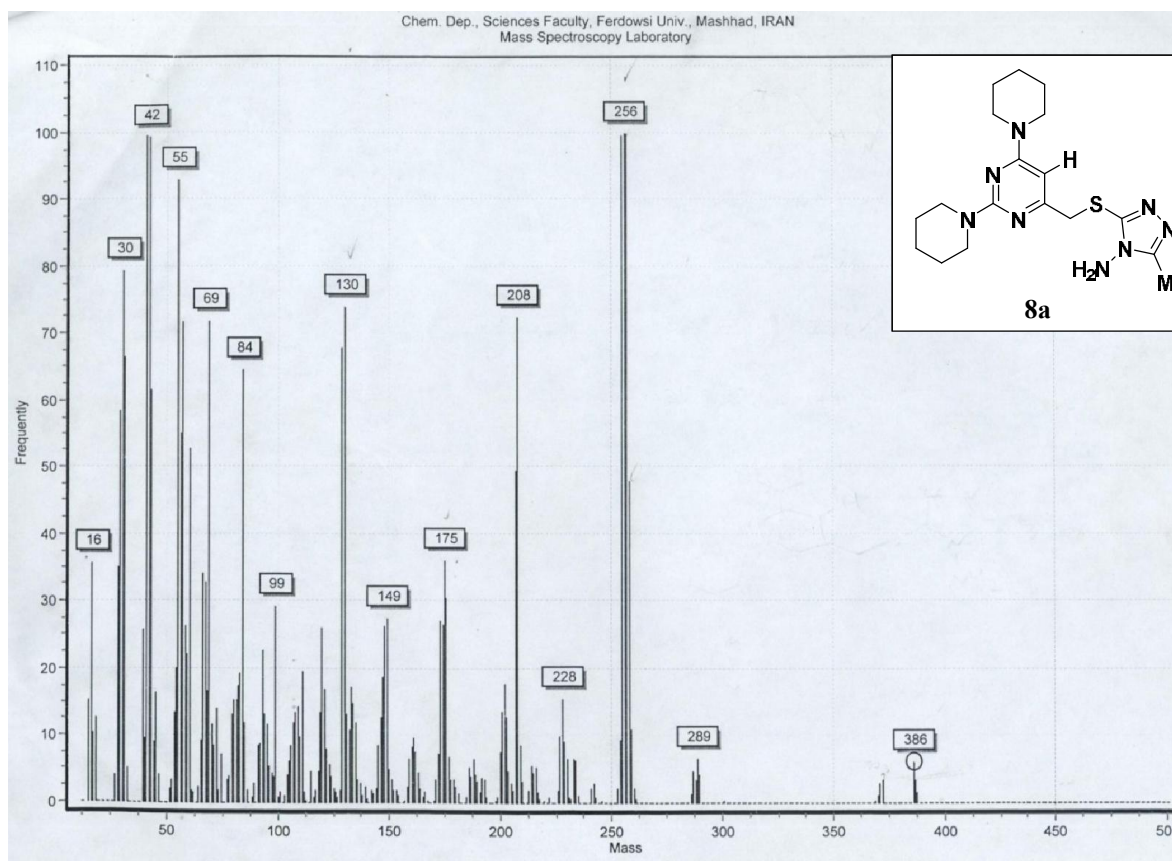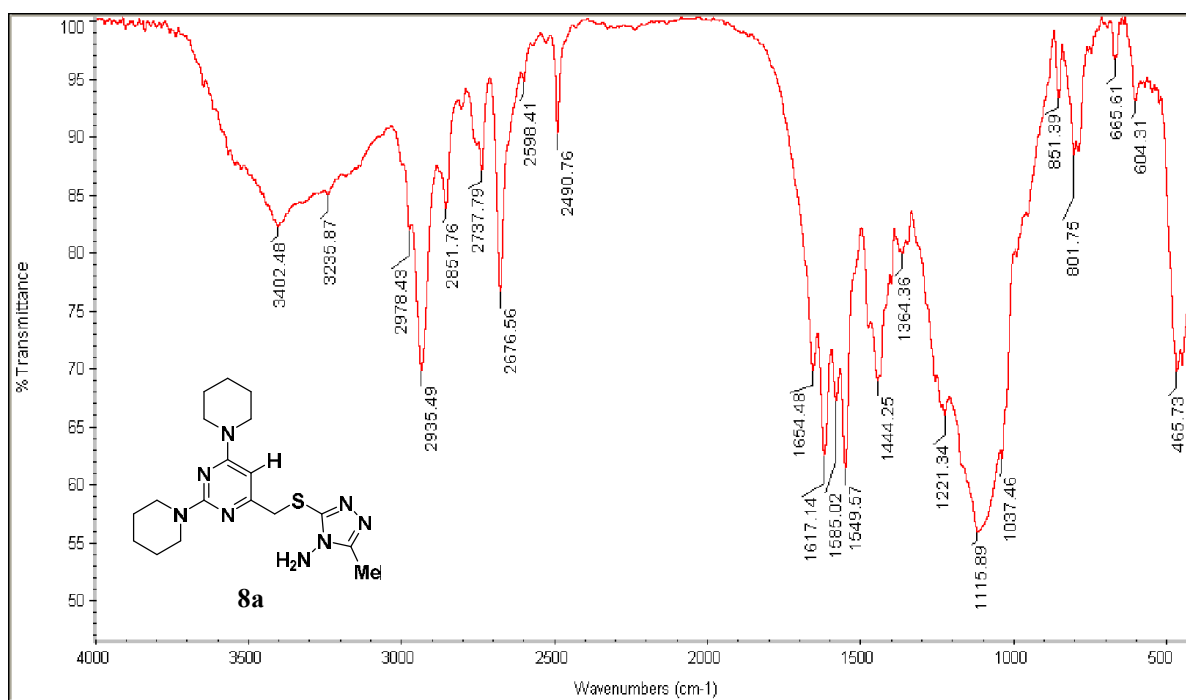

**Figure S54.** FTIR spectrum for compound 8a.



Figure S55.  $^1\text{H}$  NMR spectrum for compound 8b.

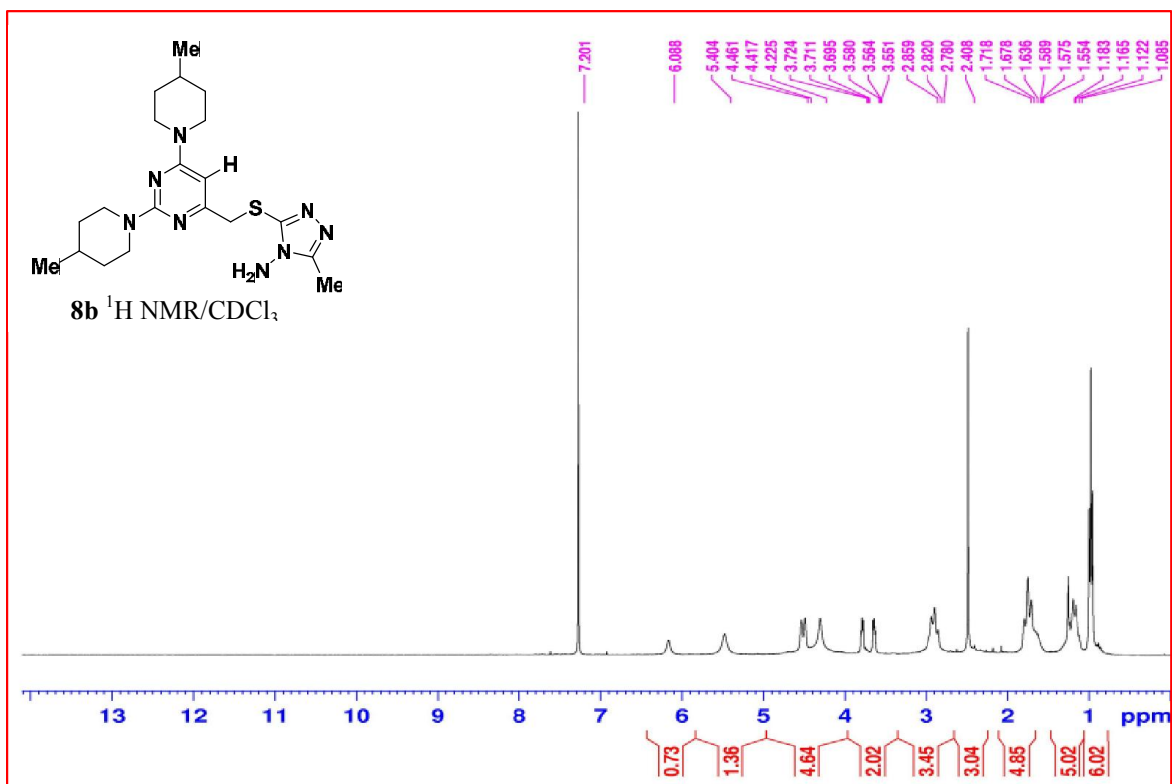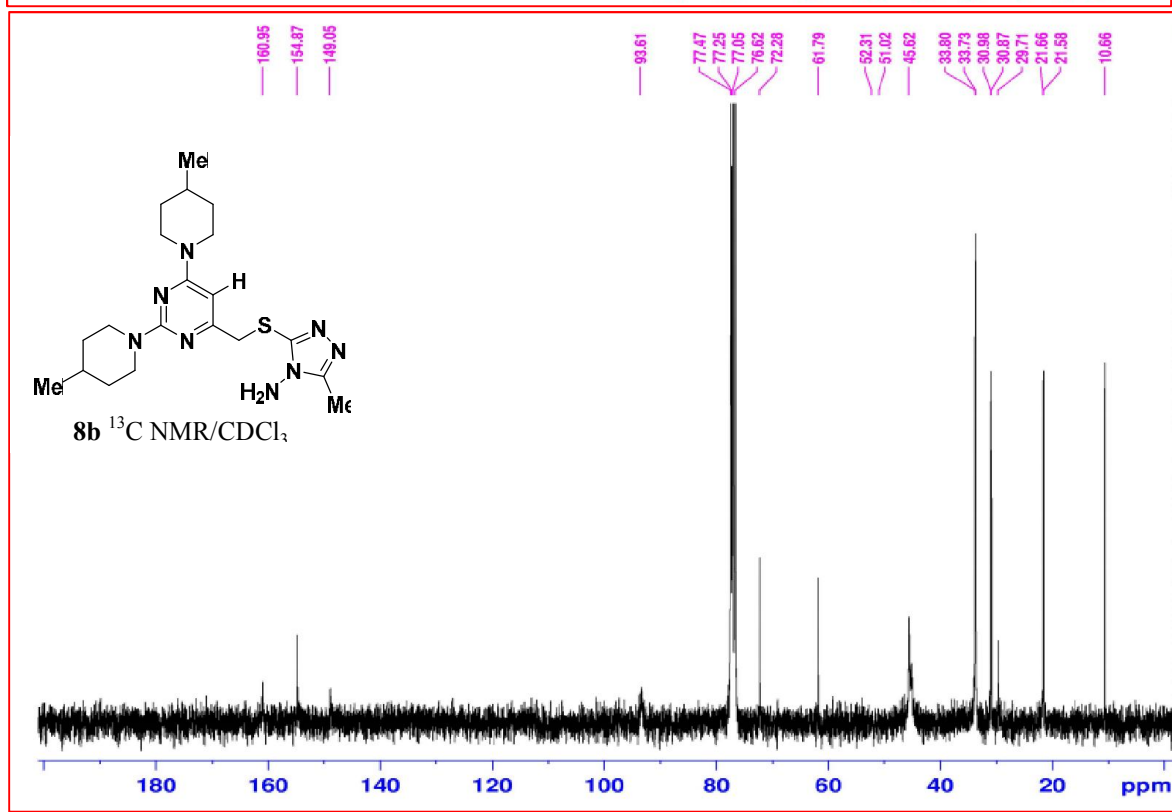

Figure S56.  $^{13}\text{C}$  NMR spectrum for compound 8b.



**Figure S57.** D<sub>2</sub>O exchange-<sup>1</sup>H NMR spectrum for compound 8b.

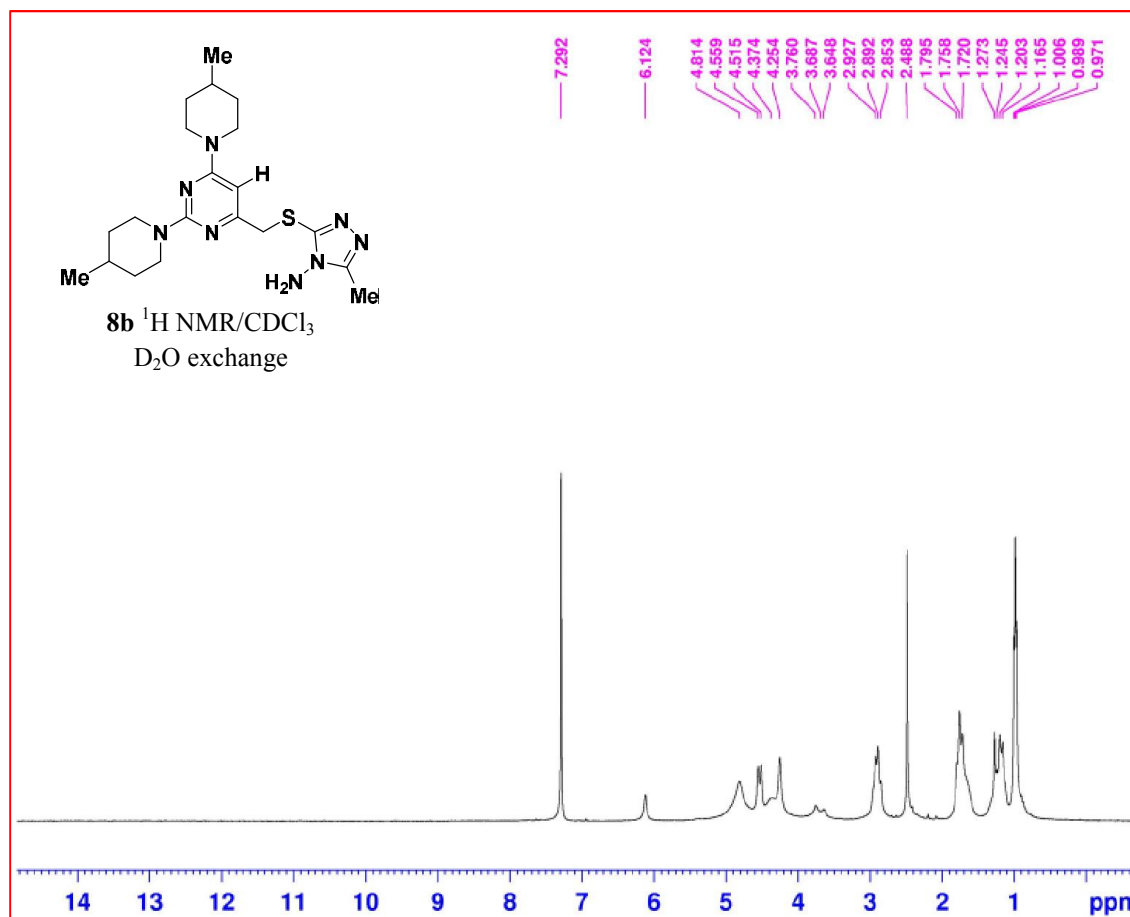

**Figure S58.** Mass spectrum for compound 8b

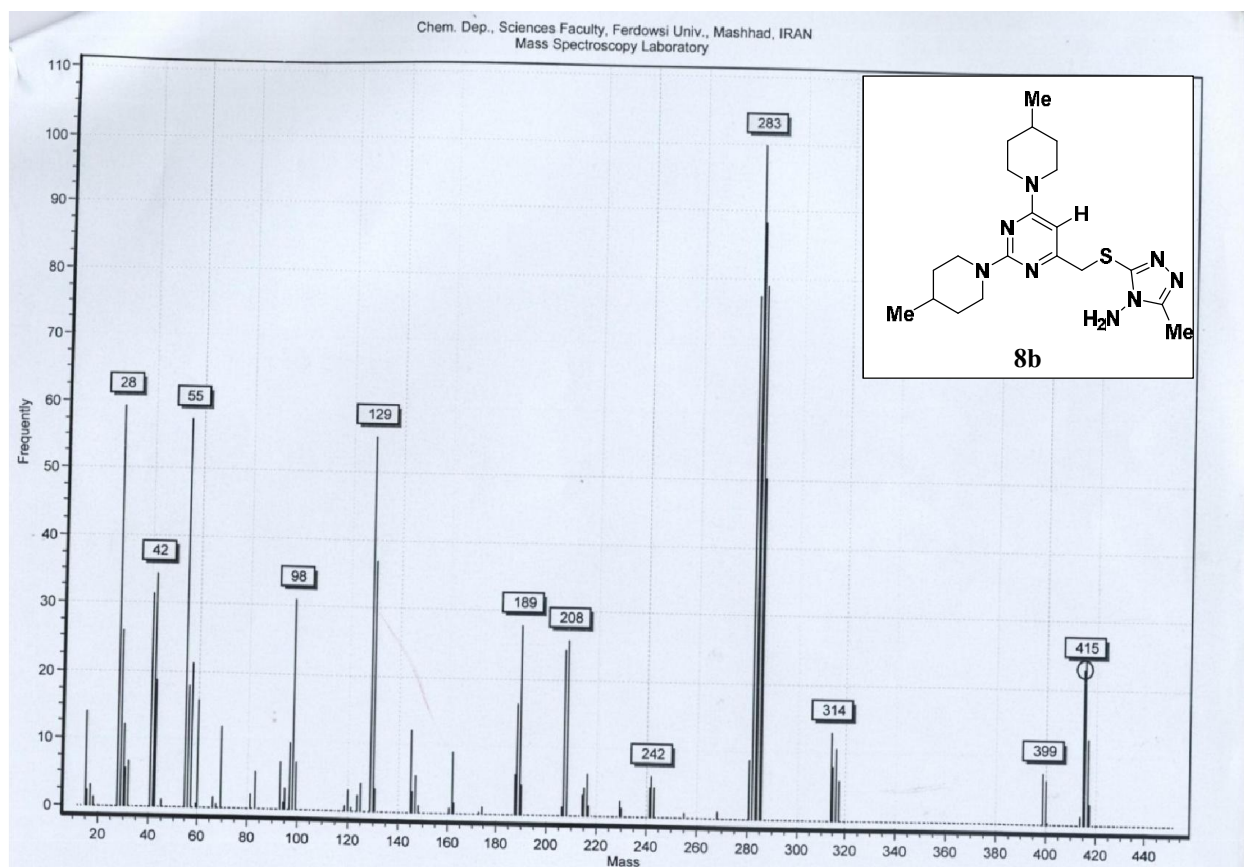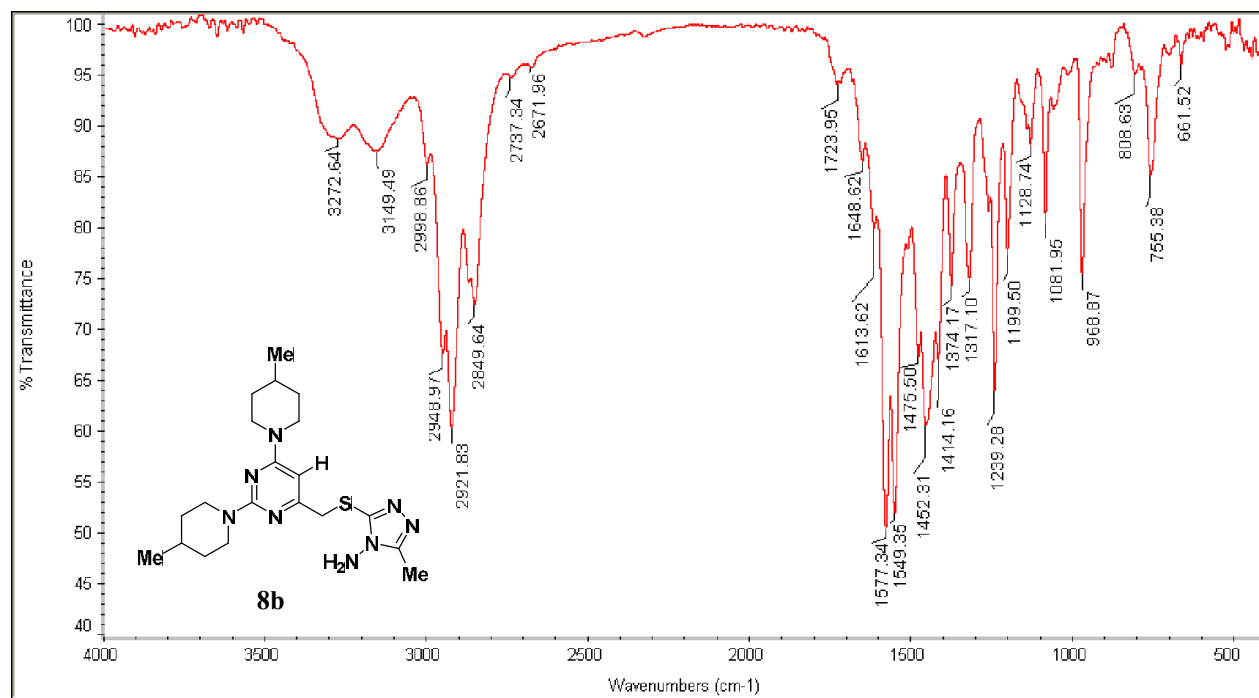

**Figure S59.** FTIR spectrum for compound 8b.

Figure S60.  $^1\text{H}$  NMR spectrum for compound 8c.

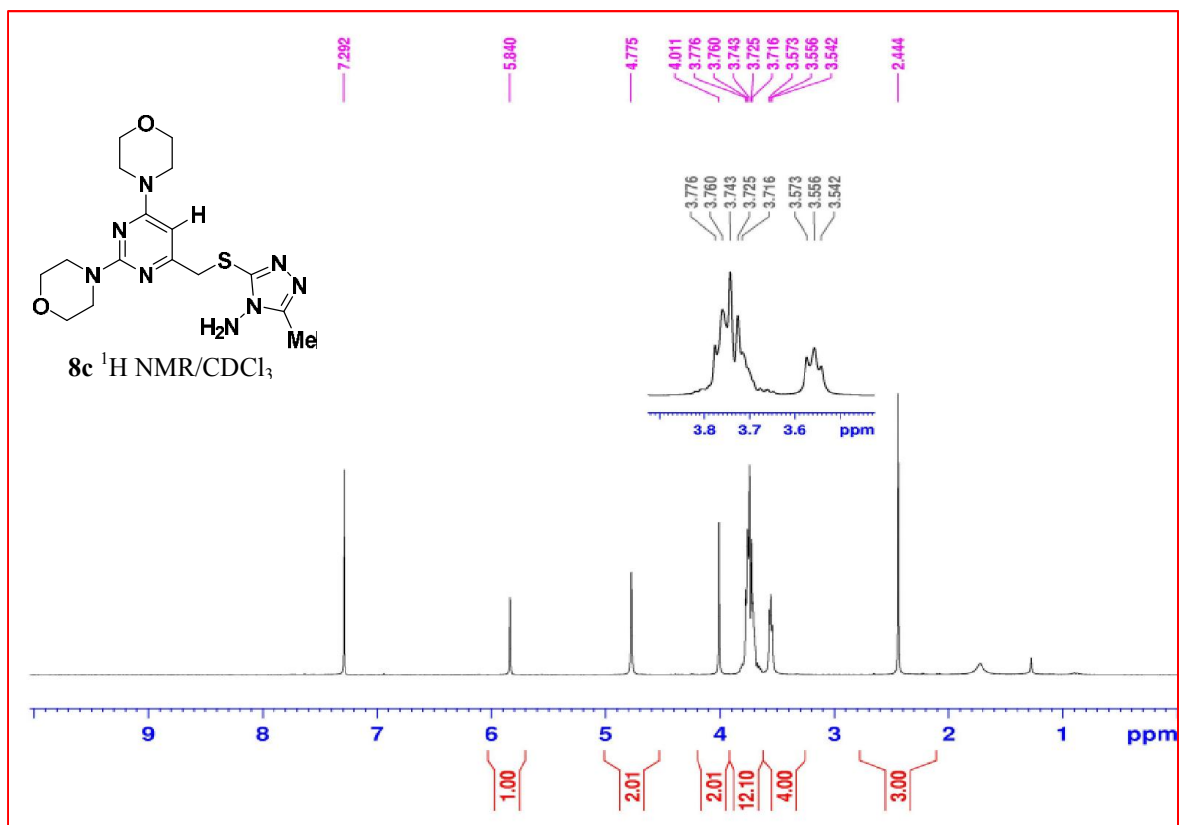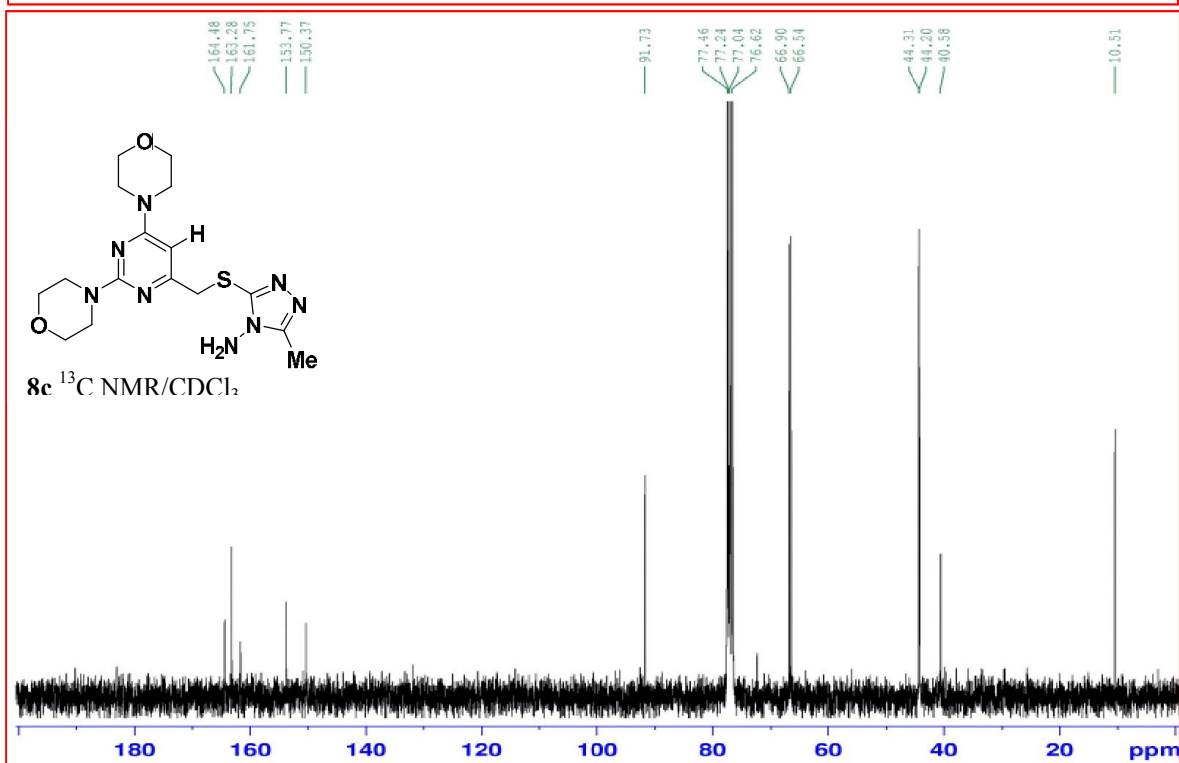

Figure S61.  $^{13}\text{C}$  NMR spectrum for compound 8c.

**Figure S62.** D<sub>2</sub>O exchange-<sup>1</sup>H NMR spectrum for compound 8c.

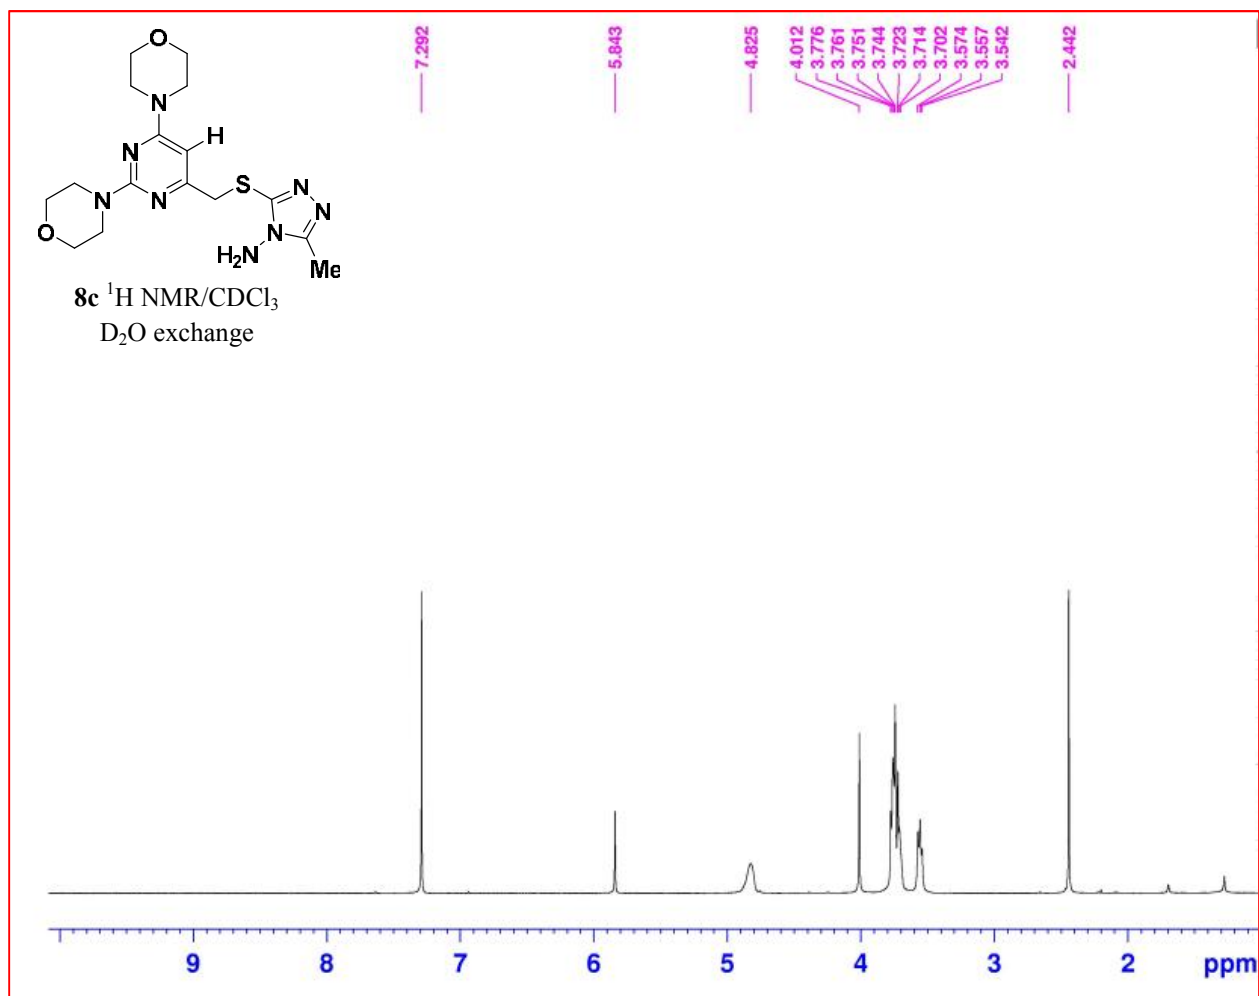

**Figure S63.** Mass spectrum for compound 8c.

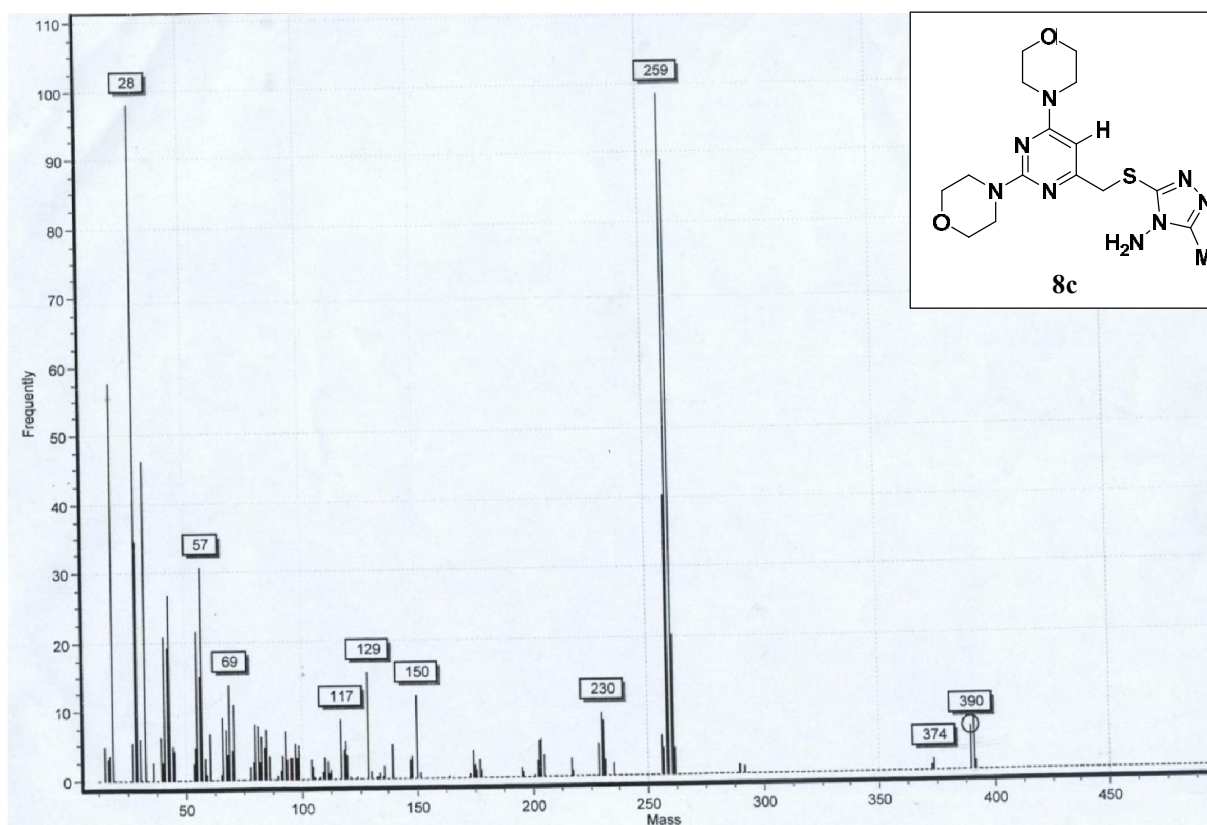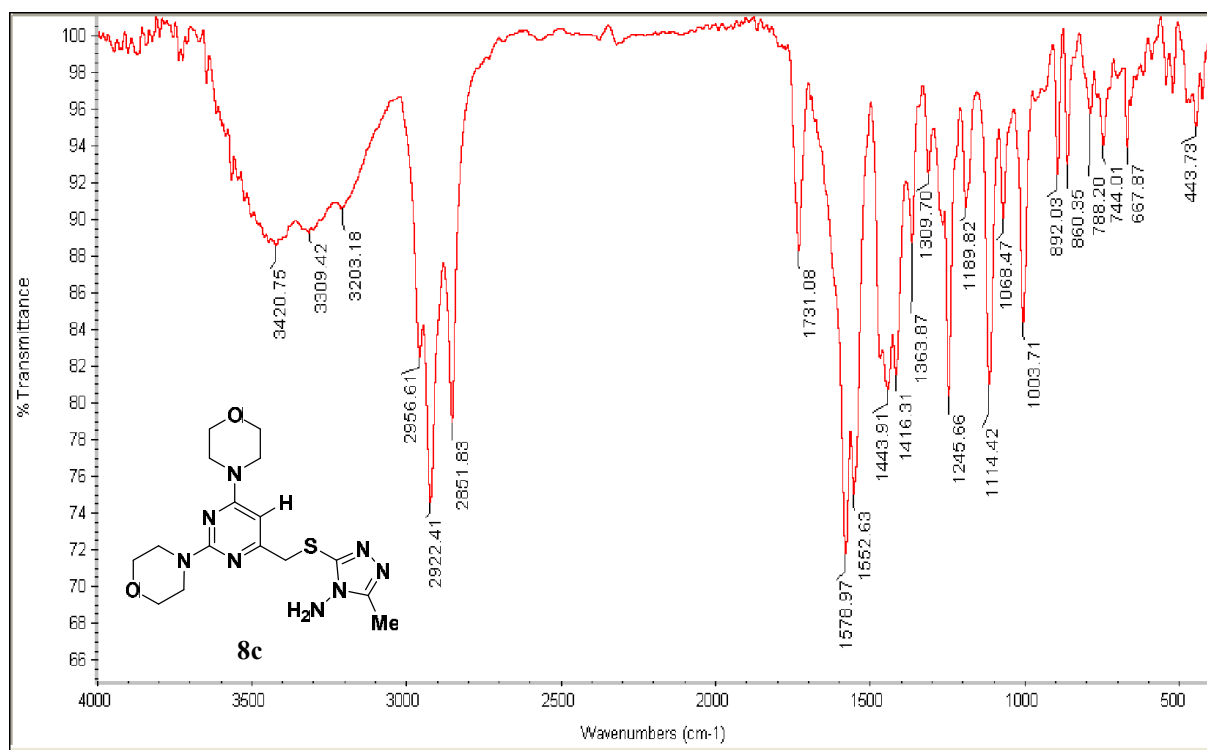

**Figure S64.** FTIR spectrum for compound 8c.

Figure S65.  $^1\text{H}$  NMR spectrum for compound 8d.

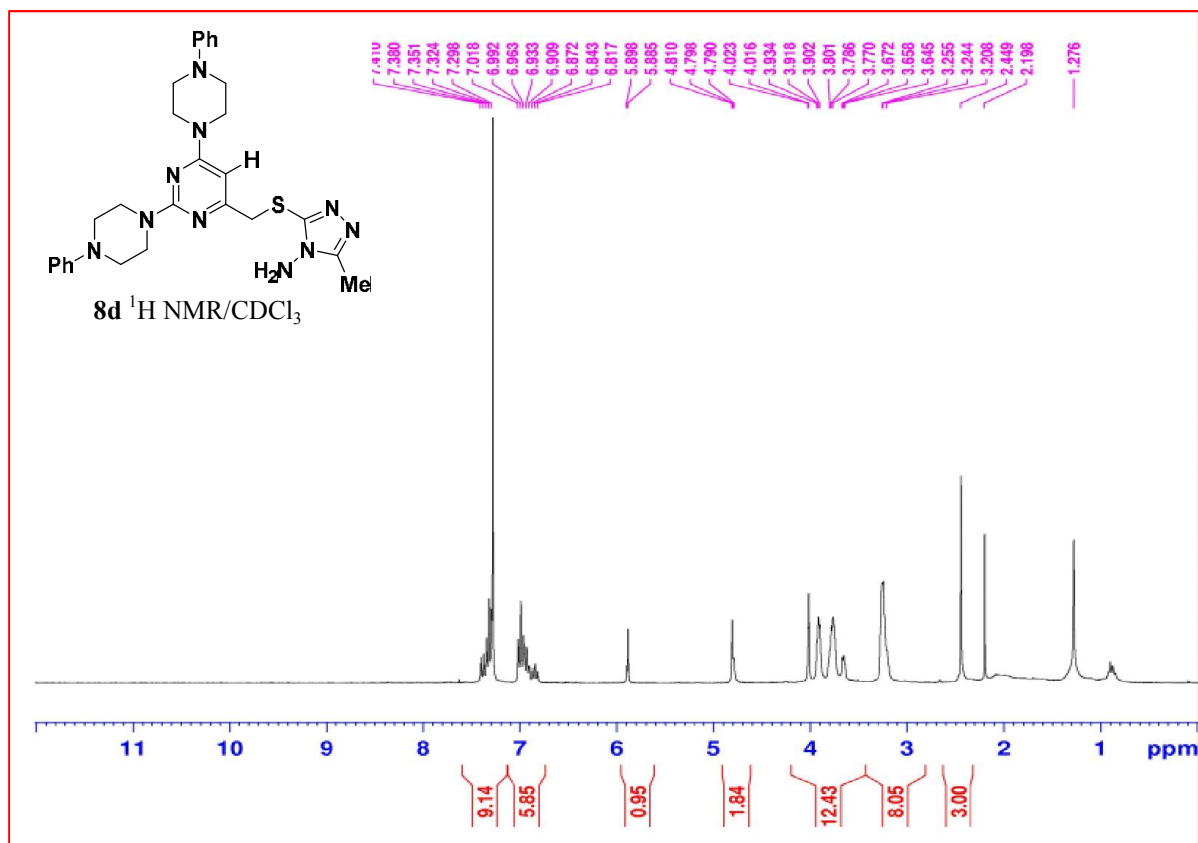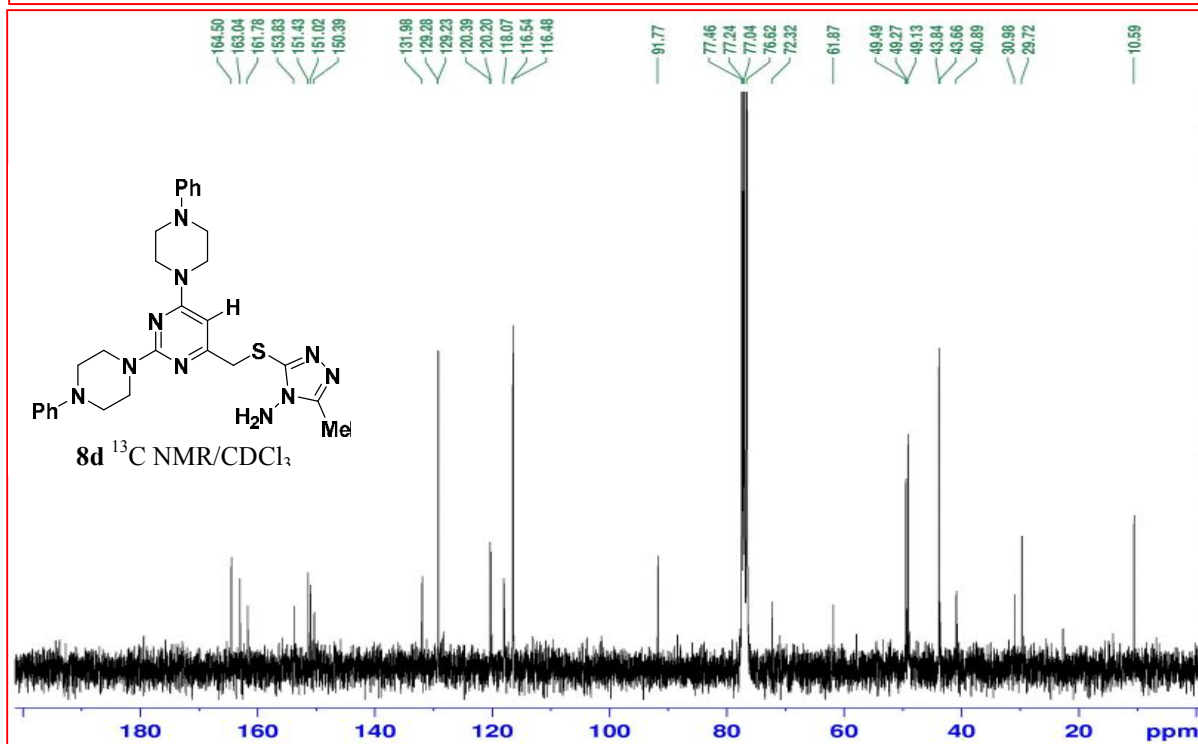

Figure S66.  $^{13}\text{C}$  NMR spectrum for compound 8d.

**Figure S67.** Mass spectrum for compound 8d.

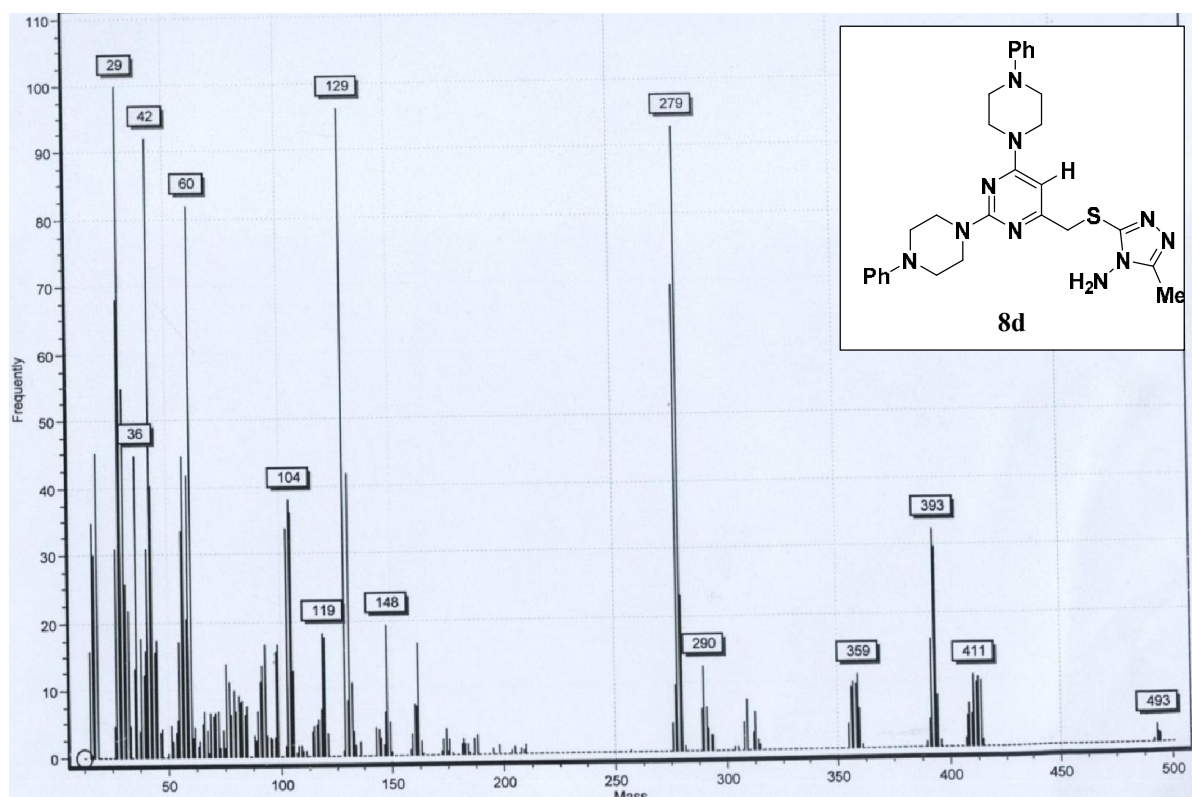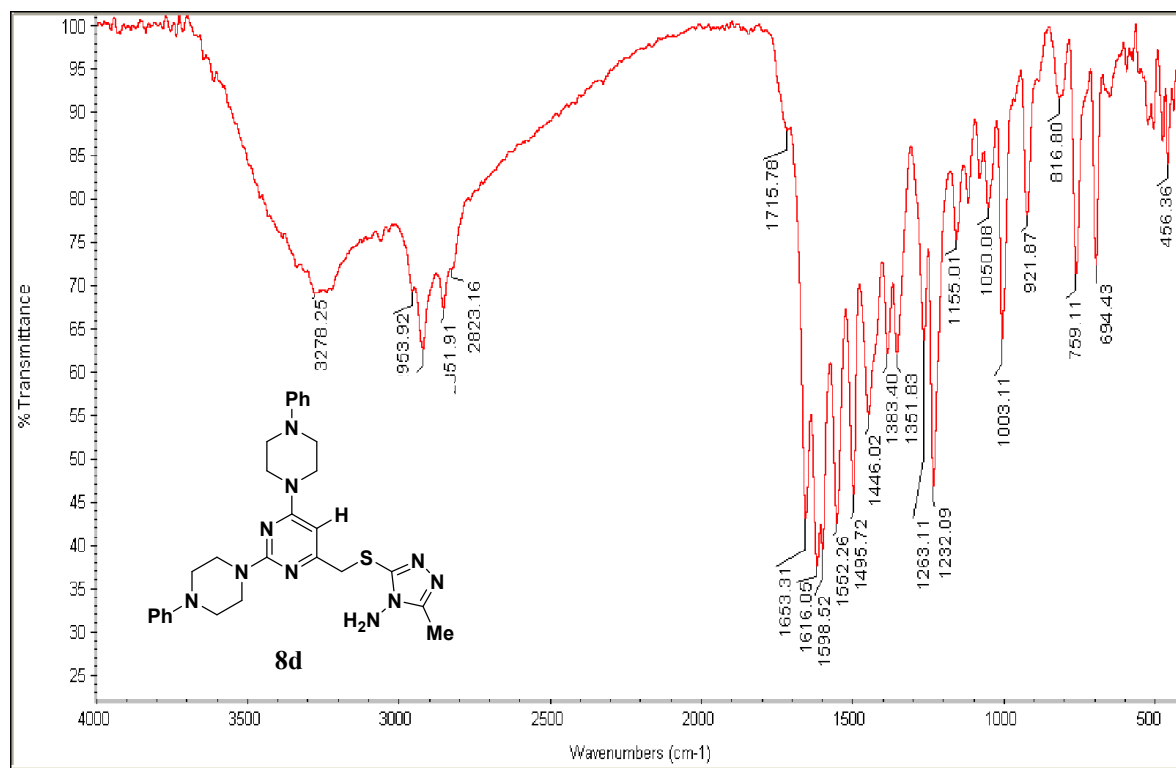

**Figure S68.** FTIR spectrum for compound 8d.

Figure S69.  $^1\text{H}$  NMR spectrum for compound 8e.

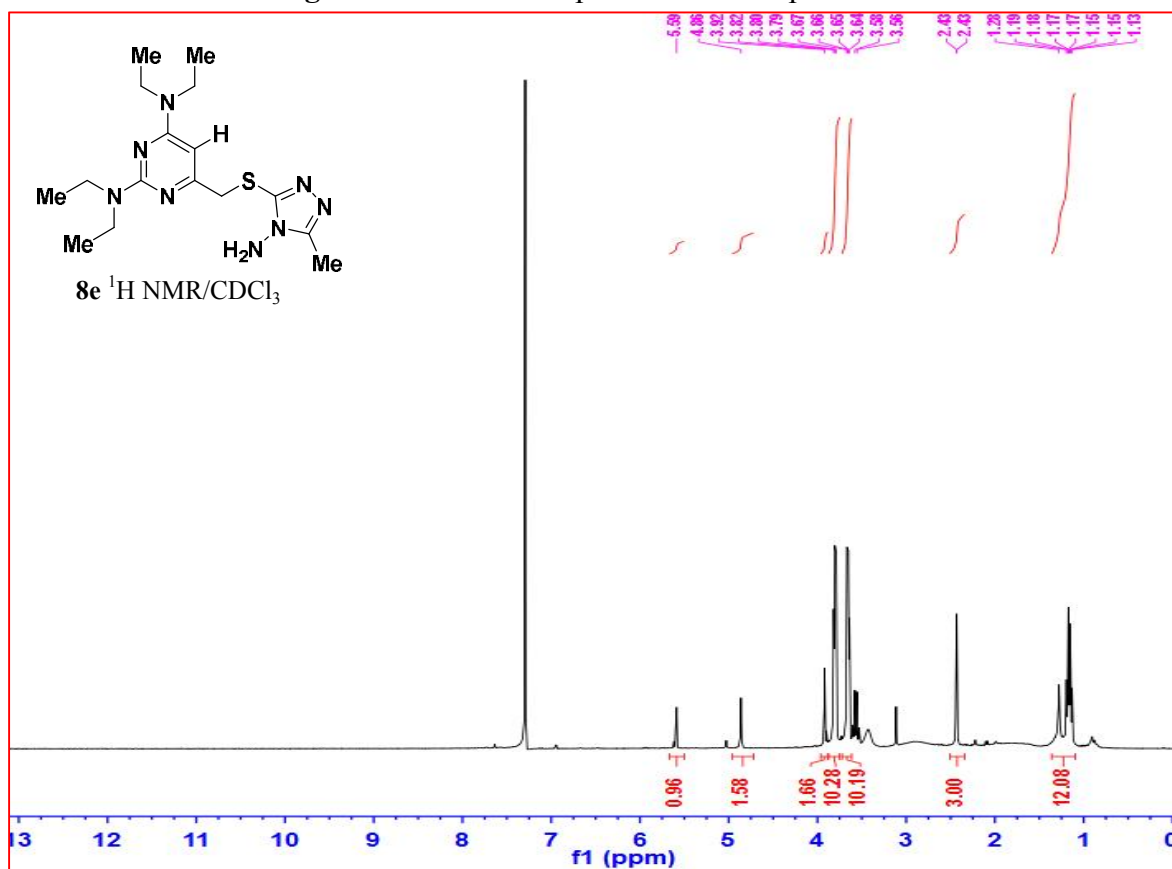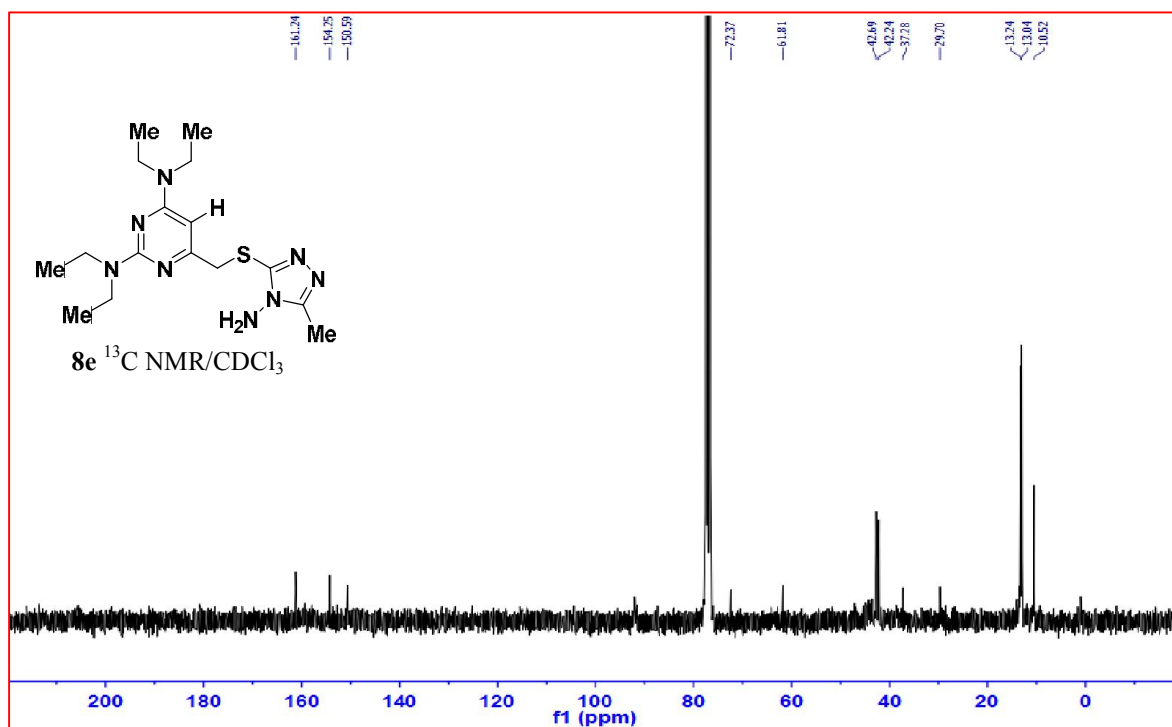

Figure S70.  $^{13}\text{C}$  NMR spectrum for compound 8e.



**Figure S71.** Mass spectrum for compound **8e**.

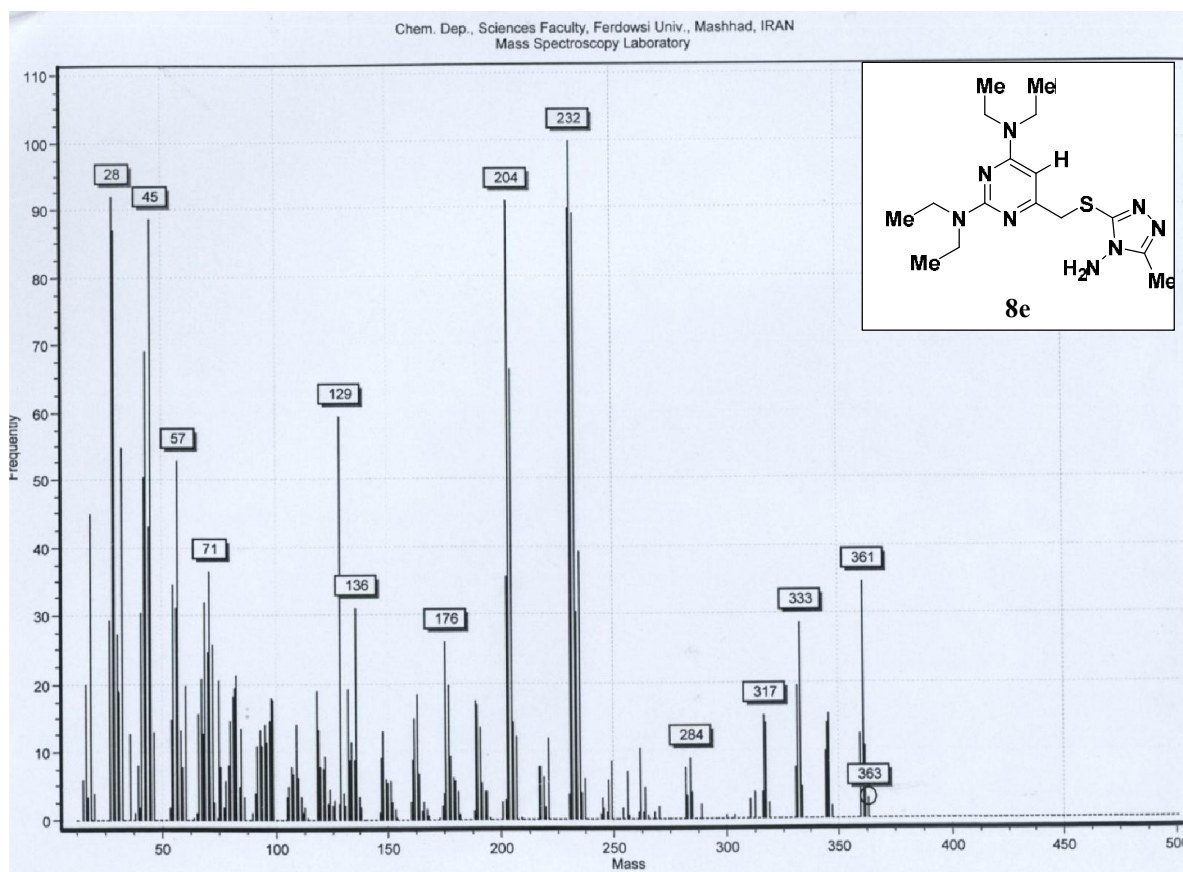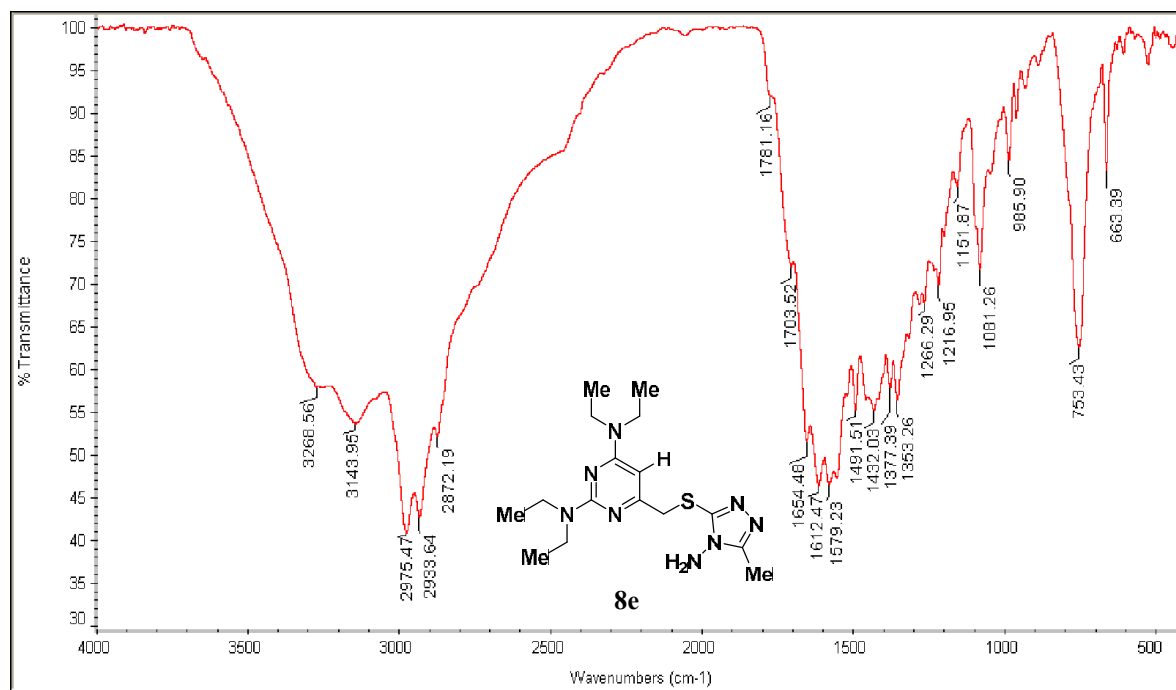

**Figure S72.** FTIR spectrum for compound **8e**.

**Figure S73.**  $^1\text{H}$  NMR spectrum for compound 10.

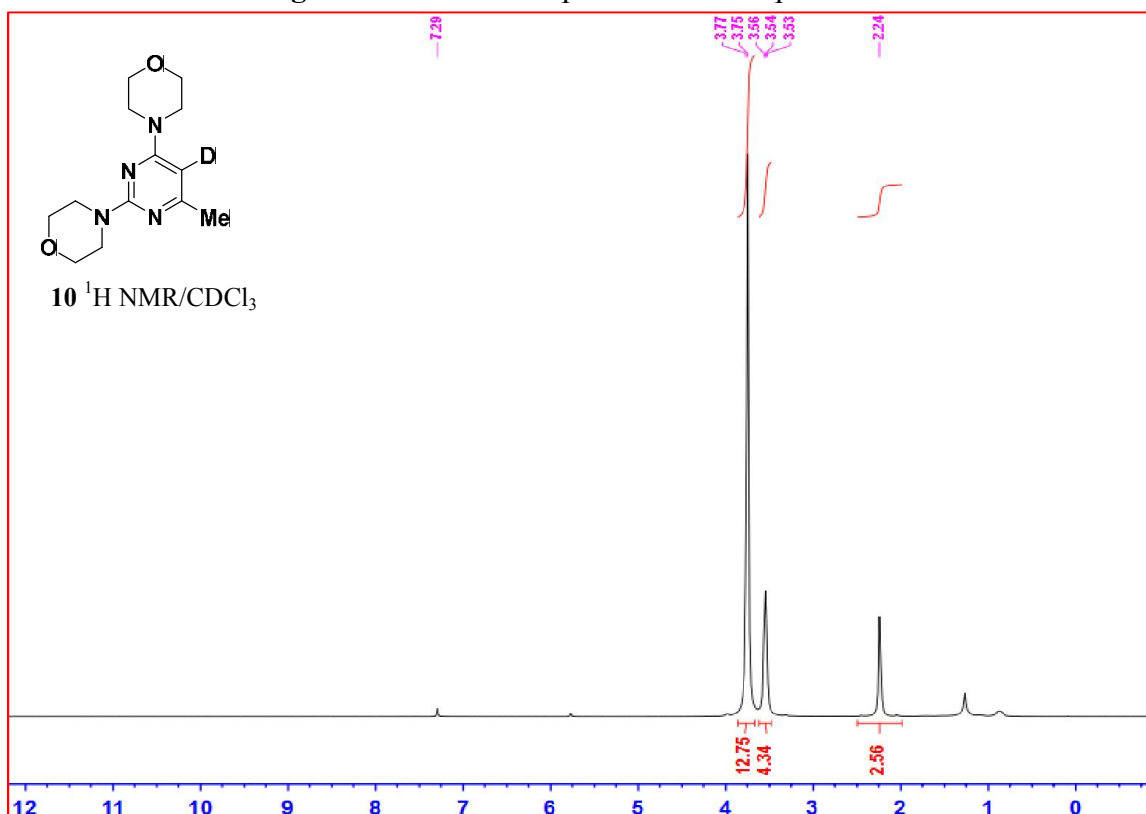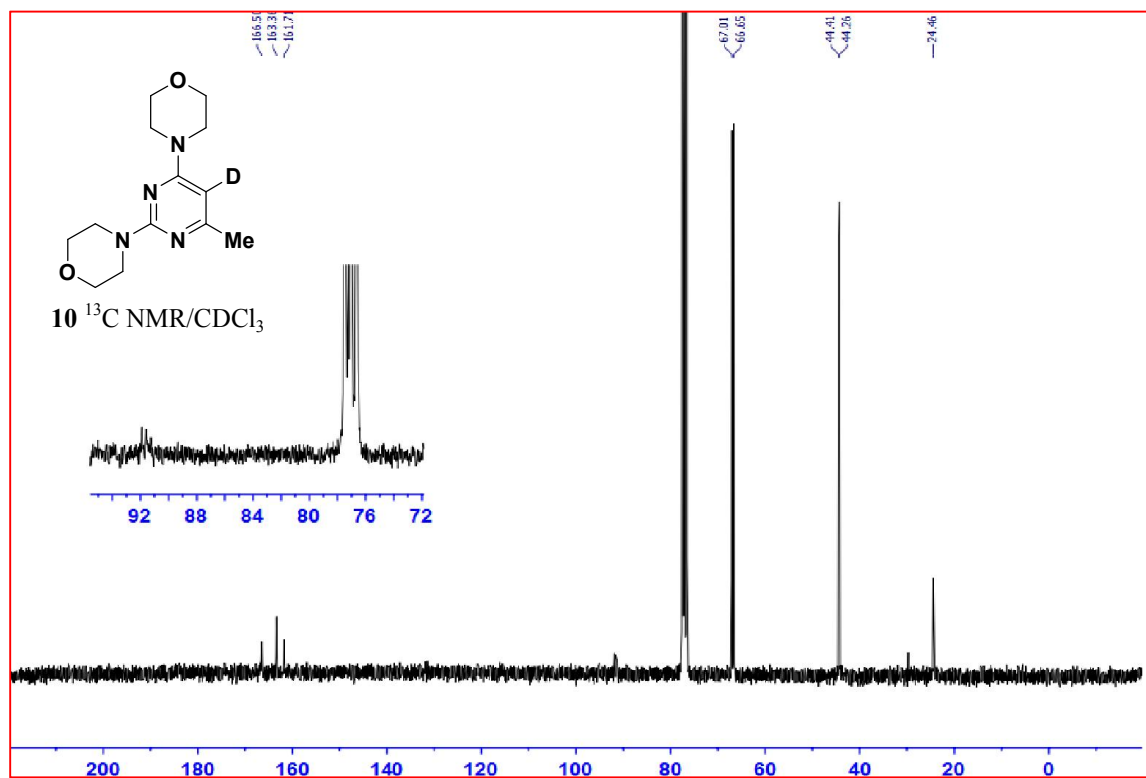

**Figure S74.**  $^{13}\text{C}$  NMR spectrum for compound 10
